# Supplementary material for: Maturity Group Classification and Maturity Locus Genotyping of Early-Maturing Soybean Varieties from High-Latitude Cold Regions
Source: PLoS One. 2014 Apr 16;9(4):e94139. doi: 10.1371/journal.pone.0094139 (PMC3989213; doi:10.1371/journal.pone.0094139)
Supplement: File S1 — Raw data of soybean maturity traits in 2010 and 2011. (XLS) [file pone.0094139.s001.xls]

## Sheet: 2010ori
Soybean Variety	The sowing day	The day to emergence (VE)	The day to beginning bloom (R1)	The day to beginning maturity (R7)
R-4	2010-05-09	2010-05-23	2010-06-19	2010-08-10
	2010-05-09	2010-05-23	2010-06-17	2010-08-10
	2010-05-09	2010-05-23	2010-06-19	2010-08-10
	2010-05-09	2010-05-23	2010-06-19	2010-08-10
	2010-05-09	2010-05-24	2010-06-19	2010-08-10
	2010-05-09	2010-05-24	2010-06-20	2010-08-10
	2010-05-09	2010-05-24	2010-06-17	2010-08-10
	2010-05-09	2010-05-24	2010-06-20	2010-08-10
	2010-05-09	2010-05-24	2010-06-19	2010-08-10
	2010-05-09	2010-05-24	2010-06-19	2010-08-10
	2010-05-09	2010-05-23	2010-06-19	2010-08-10
	2010-05-09	2010-05-23	2010-06-19	2010-08-10
	2010-05-09	2010-05-24	2010-06-19	2010-08-10
	2010-05-09	2010-05-24	2010-06-18	2010-08-10
	2010-05-09	2010-05-24	2010-06-19	2010-08-10
	2010-05-09	2010-05-23	2010-06-18	2010-08-10
	2010-05-09	2010-05-24	2010-06-18	2010-08-10
	2010-05-09	2010-05-24	2010-06-19	2010-08-10
	2010-05-09	2010-05-24	2010-06-19	2010-08-10
	2010-05-09	2010-05-23	2010-06-18	2010-08-10
	2010-05-09	2010-05-24	2010-06-20	2010-08-10
	2010-05-09	2010-05-24	2010-06-20	2010-08-10
	2010-05-09	2010-05-24	2010-06-17	2010-08-10
	2010-05-09	2010-05-24	2010-06-17	2010-08-10
	2010-05-09	2010-05-24	2010-06-17	2010-08-10
	2010-05-09	2010-05-24	2010-06-19	2010-08-10
	2010-05-09	2010-05-24	2010-06-19	2010-08-10
	2010-05-09	2010-05-24	2010-06-19	2010-08-10
	2010-05-09	2010-05-23	2010-06-19	2010-08-10
	2010-05-09	2010-05-24	2010-06-19	2010-08-10
Star 4/75	2010-05-09	2010-05-24	2010-06-17	2010-08-10
	2010-05-09	2010-05-23	2010-06-19	2010-08-10
	2010-05-09	2010-05-23	2010-06-19	2010-08-10
	2010-05-09	2010-05-24	2010-06-18	2010-08-10
	2010-05-09	2010-05-24	2010-06-19	2010-08-10
	2010-05-09	2010-05-24	2010-06-19	2010-08-10
	2010-05-09	2010-05-24	2010-06-19	2010-08-10
	2010-05-09	2010-05-24	2010-06-19	2010-08-10
	2010-05-09	2010-05-24	2010-06-19	2010-08-10
	2010-05-09	2010-05-24	2010-06-18	2010-08-10
	2010-05-09	2010-05-24	2010-06-18	2010-08-10
	2010-05-09	2010-05-24	2010-06-19	2010-08-10
	2010-05-09	2010-05-23	2010-06-19	2010-08-10
	2010-05-09	2010-05-24	2010-06-19	2010-08-10
	2010-05-09	2010-05-24	2010-06-18	2010-08-10
	2010-05-09	2010-05-23	2010-06-18	2010-08-10
	2010-05-09	2010-05-23	2010-06-18	2010-08-10
	2010-05-09	2010-05-24	2010-06-19	2010-08-10
	2010-05-09	2010-05-24	2010-06-19	2010-08-10
	2010-05-09	2010-05-24	2010-06-18	2010-08-10
	2010-05-09	2010-05-24	2010-06-19	2010-08-10
	2010-05-09	2010-05-24	2010-06-19	2010-08-10
	2010-05-09	2010-05-24	2010-06-18	2010-08-10
	2010-05-09	2010-05-24	2010-06-19	2010-08-10
	2010-05-09	2010-05-24	2010-06-18	2010-08-10
	2010-05-09	2010-05-24	2010-06-19	2010-08-10
	2010-05-09	2010-05-25	2010-06-19	2010-08-10
	2010-05-09	2010-05-24	2010-06-19	2010-08-10
	2010-05-09	2010-05-24	2010-06-18	2010-08-10
	2010-05-09	2010-05-23	2010-06-18	2010-08-10
Paula	2010-05-09	2010-05-24	2010-06-17	2010-08-12
	2010-05-09	2010-05-25	2010-06-18	2010-08-12
	2010-05-09	2010-05-25	2010-06-18	2010-08-12
	2010-05-09	2010-05-25	2010-06-18	2010-08-12
	2010-05-09	2010-05-25	2010-06-18	2010-08-12
	2010-05-09	2010-05-25	2010-06-18	2010-08-13
	2010-05-09	2010-05-24	2010-06-18	2010-08-13
	2010-05-09	2010-05-25	2010-06-18	2010-08-12
	2010-05-09	2010-05-24	2010-06-18	2010-08-12
	2010-05-09	2010-05-24	2010-06-19	2010-08-12
	2010-05-09	2010-05-24	2010-06-18	2010-08-12
	2010-05-09	2010-05-24	2010-06-18	2010-08-13
	2010-05-09	2010-05-25	2010-06-18	2010-08-12
	2010-05-09	2010-05-25	2010-06-18	2010-08-12
	2010-05-09	2010-05-25	2010-06-19	2010-08-13
	2010-05-09	2010-05-24	2010-06-19	2010-08-12
	2010-05-09	2010-05-25	2010-06-18	2010-08-12
	2010-05-09	2010-05-24	2010-06-18	2010-08-12
	2010-05-09	2010-05-25	2010-06-18	2010-08-12
	2010-05-09	2010-05-25	2010-06-18	2010-08-12
	2010-05-09	2010-05-24	2010-06-19	2010-08-12
	2010-05-09	2010-05-24	2010-06-18	2010-08-12
	2010-05-09	2010-05-25	2010-06-18	2010-08-13
	2010-05-09	2010-05-25	2010-06-19	2010-08-13
	2010-05-09	2010-05-24	2010-06-19	2010-08-13
	2010-05-09	2010-05-24	2010-06-18	2010-08-13
	2010-05-09	2010-05-25	2010-06-18	2010-08-13
	2010-05-09	2010-05-25	2010-06-18	2010-08-12
	2010-05-09	2010-05-25	2010-06-18	2010-08-13
	2010-05-09	NA	NA	NA
R-2	2010-05-09	2010-05-24	2010-06-19	2010-08-22
	2010-05-09	2010-05-24	2010-06-20	2010-08-22
	2010-05-09	2010-05-24	2010-06-20	2010-08-22
	2010-05-09	2010-05-24	2010-06-19	2010-08-22
	2010-05-09	2010-05-24	2010-06-19	2010-08-22
	2010-05-09	2010-05-24	2010-06-19	2010-08-22
	2010-05-09	2010-05-24	2010-06-19	2010-08-22
	2010-05-09	2010-05-24	2010-06-19	2010-08-22
	2010-05-09	2010-05-24	2010-06-19	2010-08-22
	2010-05-09	2010-05-24	2010-06-19	2010-08-22
	2010-05-09	2010-05-25	2010-06-20	2010-08-22
	2010-05-09	2010-05-25	2010-06-19	2010-08-22
	2010-05-09	2010-05-25	2010-06-19	2010-08-22
	2010-05-09	2010-05-25	2010-06-18	2010-08-22
	2010-05-09	2010-05-24	2010-06-19	2010-08-22
	2010-05-09	2010-05-24	2010-06-20	2010-08-22
	2010-05-09	2010-05-24	2010-06-19	2010-08-22
	2010-05-09	2010-05-25	2010-06-19	2010-08-22
	2010-05-09	2010-05-24	2010-06-19	2010-08-22
	2010-05-09	2010-05-24	2010-06-20	2010-08-22
	2010-05-09	2010-05-24	2010-06-20	2010-08-22
	2010-05-09	2010-05-24	2010-06-19	2010-08-22
	2010-05-09	2010-05-24	2010-06-19	2010-08-22
	2010-05-09	2010-05-24	2010-06-19	2010-08-22
	2010-05-09	2010-05-25	2010-06-19	2010-08-22
	2010-05-09	2010-05-25	2010-06-19	2010-08-22
	2010-05-09	2010-05-25	2010-06-19	2010-08-22
	2010-05-09	2010-05-25	2010-06-19	2010-08-22
	2010-05-09	2010-05-25	2010-06-19	2010-08-22
	2010-05-09	2010-05-24	2010-06-19	2010-08-22
R-3	2010-05-09	2010-05-24	2010-06-19	2010-08-12
	2010-05-09	2010-05-24	2010-06-19	2010-08-12
	2010-05-09	2010-05-24	2010-06-19	2010-08-12
	2010-05-09	2010-05-24	2010-06-20	2010-08-12
	2010-05-09	2010-05-24	2010-06-20	2010-08-12
	2010-05-09	2010-05-24	2010-06-20	2010-08-12
	2010-05-09	2010-05-24	2010-06-20	2010-08-12
	2010-05-09	2010-05-24	2010-06-20	2010-08-12
	2010-05-09	2010-05-25	2010-06-20	2010-08-12
	2010-05-09	2010-05-24	2010-06-19	2010-08-12
	2010-05-09	2010-05-24	2010-06-20	2010-08-12
	2010-05-09	2010-05-24	2010-06-20	2010-08-12
	2010-05-09	2010-05-25	2010-06-19	2010-08-13
	2010-05-09	2010-05-24	2010-06-20	2010-08-12
	2010-05-09	2010-05-24	2010-06-19	2010-08-12
	2010-05-09	2010-05-24	2010-06-20	2010-08-13
	2010-05-09	2010-05-24	2010-06-20	2010-08-13
	2010-05-09	2010-05-24	2010-06-20	2010-08-13
	2010-05-09	2010-05-24	2010-06-20	2010-08-12
	2010-05-09	2010-05-24	2010-06-20	2010-08-12
	2010-05-09	2010-05-24	2010-06-20	2010-08-12
	2010-05-09	2010-05-24	2010-06-20	2010-08-12
	2010-05-09	2010-05-24	2010-06-19	2010-08-13
	2010-05-09	2010-05-25	2010-06-20	2010-08-12
	2010-05-09	2010-05-25	2010-06-19	2010-08-12
	2010-05-09	2010-05-24	2010-06-19	2010-08-12
	2010-05-09	2010-05-24	2010-06-20	2010-08-12
	2010-05-09	2010-05-24	2010-06-20	2010-08-12
	2010-05-09	2010-05-25	2010-06-20	2010-08-12
	2010-05-09	2010-05-24	2010-06-19	2010-08-12
Dongnong 41-C	2010-05-09	2010-05-25	2010-06-19	2010-08-17
	2010-05-09	2010-05-24	2010-06-19	2010-08-17
	2010-05-09	2010-05-25	2010-06-20	2010-08-17
	2010-05-09	2010-05-25	2010-06-20	2010-08-17
	2010-05-09	2010-05-25	2010-06-20	2010-08-17
	2010-05-09	2010-05-24	2010-06-20	2010-08-17
	2010-05-09	2010-05-24	2010-06-20	2010-08-17
	2010-05-09	2010-05-25	2010-06-19	2010-08-17
	2010-05-09	2010-05-24	2010-06-20	2010-08-17
	2010-05-09	2010-05-25	2010-06-19	2010-08-16
	2010-05-09	2010-05-25	2010-06-20	2010-08-16
	2010-05-09	2010-05-25	2010-06-20	2010-08-16
	2010-05-09	2010-05-24	2010-06-20	2010-08-16
	2010-05-09	2010-05-25	2010-06-20	2010-08-17
	2010-05-09	2010-05-24	2010-06-20	2010-08-16
	2010-05-09	2010-05-24	2010-06-19	2010-08-16
	2010-05-09	2010-05-25	2010-06-19	2010-08-16
	2010-05-09	2010-05-25	2010-06-19	2010-08-16
	2010-05-09	2010-05-25	2010-06-19	2010-08-17
	2010-05-09	2010-05-24	2010-06-19	2010-08-17
	2010-05-09	2010-05-24	2010-06-19	2010-08-16
	2010-05-09	2010-05-24	2010-06-19	2010-08-16
	2010-05-09	2010-05-25	2010-06-19	2010-08-16
	2010-05-09	2010-05-25	2010-06-19	2010-08-16
	2010-05-09	2010-05-24	2010-06-19	2010-08-16
	2010-05-09	2010-05-25	2010-06-19	2010-08-16
	2010-05-09	2010-05-23	2010-06-19	2010-08-17
	2010-05-09	2010-05-24	2010-06-19	2010-08-16
	2010-05-09	2010-05-25	2010-06-19	2010-08-17
	2010-05-09	2010-05-24	2010-06-20	2010-08-17
Lingbei 8	2010-05-09	2010-05-24	2010-06-19	2010-08-15
	2010-05-09	2010-05-24	2010-06-20	2010-08-16
	2010-05-09	2010-05-24	2010-06-18	2010-08-15
	2010-05-09	2010-05-25	2010-06-19	2010-08-15
	2010-05-09	2010-05-25	2010-06-20	2010-08-15
	2010-05-09	2010-05-24	2010-06-19	2010-08-15
	2010-05-09	2010-05-24	2010-06-19	2010-08-15
	2010-05-09	2010-05-25	2010-06-20	2010-08-15
	2010-05-09	2010-05-24	2010-06-19	2010-08-15
	2010-05-09	2010-05-24	2010-06-19	2010-08-15
	2010-05-09	2010-05-25	2010-06-19	2010-08-15
	2010-05-09	2010-05-25	2010-06-19	2010-08-15
	2010-05-09	2010-05-24	2010-06-19	2010-08-15
	2010-05-09	2010-05-25	2010-06-19	2010-08-15
	2010-05-09	2010-05-24	2010-06-20	2010-08-15
	2010-05-09	2010-05-24	2010-06-19	2010-08-15
	2010-05-09	2010-05-25	2010-06-20	2010-08-14
	2010-05-09	2010-05-24	2010-06-19	2010-08-14
	2010-05-09	2010-05-24	2010-06-20	2010-08-14
	2010-05-09	2010-05-25	2010-06-20	2010-08-14
	2010-05-09	2010-05-24	2010-06-19	2010-08-14
	2010-05-09	2010-05-24	2010-06-20	2010-08-15
	2010-05-09	2010-05-25	2010-06-19	2010-08-15
	2010-05-09	2010-05-25	2010-06-19	2010-08-15
	2010-05-09	2010-05-25	2010-06-19	2010-08-15
	2010-05-09	2010-05-24	2010-06-19	2010-08-15
	2010-05-09	2010-05-24	2010-06-19	2010-08-15
	2010-05-09	2010-05-25	2010-06-19	2010-08-15
	2010-05-09	2010-05-24	2010-06-20	2010-08-15
	2010-05-09	2010-05-24	2010-06-19	2010-08-15
Heihe 14	2010-05-09	2010-05-24	2010-06-19	2010-08-22
	2010-05-09	2010-05-23	2010-06-17	2010-08-22
	2010-05-09	2010-05-24	2010-06-18	2010-08-22
	2010-05-09	2010-05-25	2010-06-18	2010-08-22
	2010-05-09	2010-05-25	2010-06-19	2010-08-22
	2010-05-09	2010-05-25	2010-06-18	2010-08-22
	2010-05-09	2010-05-24	2010-06-18	2010-08-22
	2010-05-09	2010-05-24	2010-06-19	2010-08-22
	2010-05-09	2010-05-24	2010-06-19	2010-08-23
	2010-05-09	2010-05-24	2010-06-19	2010-08-22
	2010-05-09	2010-05-25	2010-06-19	2010-08-22
	2010-05-09	2010-05-24	2010-06-19	2010-08-22
	2010-05-09	2010-05-24	2010-06-19	2010-08-22
	2010-05-09	2010-05-24	2010-06-19	2010-08-22
	2010-05-09	2010-05-24	2010-06-19	2010-08-22
	2010-05-09	2010-05-24	2010-06-19	2010-08-23
	2010-05-09	2010-05-25	2010-06-19	2010-08-22
	2010-05-09	2010-05-25	2010-06-19	2010-08-22
	2010-05-09	2010-05-24	2010-06-19	2010-08-22
	2010-05-09	2010-05-24	2010-06-19	2010-08-22
	2010-05-09	2010-05-24	2010-06-19	2010-08-22
	2010-05-09	2010-05-24	2010-06-19	2010-08-23
	2010-05-09	2010-05-24	2010-06-19	2010-08-23
	2010-05-09	2010-05-25	2010-06-19	2010-08-23
	2010-05-09	2010-05-24	2010-06-19	2010-08-23
	2010-05-09	2010-05-25	2010-06-19	2010-08-23
	2010-05-09	2010-05-24	2010-06-19	2010-08-23
	2010-05-09	2010-05-25	2010-06-19	2010-08-22
	2010-05-09	2010-05-25	2010-06-19	2010-08-22
	2010-05-09	2010-05-24	2010-06-19	2010-08-22
Bista	2010-05-09	2010-05-24	2010-06-20	2010-08-22
	2010-05-09	2010-05-23	2010-06-21	2010-08-22
	2010-05-09	2010-05-23	2010-06-20	2010-08-22
	2010-05-09	2010-05-23	2010-06-19	2010-08-22
	2010-05-09	2010-05-24	2010-06-21	2010-08-22
	2010-05-09	2010-05-24	2010-06-19	2010-08-22
	2010-05-09	2010-05-24	2010-06-19	2010-08-22
	2010-05-09	2010-05-24	2010-06-19	2010-08-22
	2010-05-09	2010-05-24	2010-06-20	2010-08-22
	2010-05-09	2010-05-24	2010-06-19	2010-08-23
	2010-05-09	2010-05-24	2010-06-19	2010-08-22
	2010-05-09	2010-05-24	2010-06-19	2010-08-22
	2010-05-09	2010-05-25	2010-06-19	2010-08-22
	2010-05-09	2010-05-25	2010-06-19	2010-08-22
	2010-05-09	2010-05-24	2010-06-19	2010-08-22
	2010-05-09	2010-05-24	2010-06-19	2010-08-22
	2010-05-09	2010-05-24	2010-06-19	2010-08-23
	2010-05-09	2010-05-23	2010-06-21	2010-08-22
	2010-05-09	2010-05-23	2010-06-19	2010-08-22
	2010-05-09	2010-05-24	2010-06-21	2010-08-22
	2010-05-09	2010-05-23	2010-06-19	2010-08-22
	2010-05-09	2010-05-24	2010-06-19	2010-08-22
	2010-05-09	2010-05-24	2010-06-19	2010-08-22
	2010-05-09	2010-05-24	2010-06-19	2010-08-22
	2010-05-09	2010-05-24	2010-06-19	2010-08-22
	2010-05-09	2010-05-24	2010-06-20	2010-08-22
	2010-05-09	2010-05-24	2010-06-19	2010-08-22
	2010-05-09	2010-05-25	2010-06-20	2010-08-22
	2010-05-09	2010-05-25	2010-06-19	2010-08-22
	2010-05-09	2010-05-24	2010-06-19	2010-08-22
Ha 6223-4	2010-05-09	2010-05-23	2010-06-17	2010-08-25
	2010-05-09	2010-05-24	2010-06-17	2010-08-25
	2010-05-09	2010-05-23	2010-06-17	2010-08-25
	2010-05-09	2010-05-24	2010-06-17	2010-08-25
	2010-05-09	2010-05-24	2010-06-18	2010-08-25
	2010-05-09	2010-05-24	2010-06-18	2010-08-25
	2010-05-09	2010-05-24	2010-06-17	2010-08-25
	2010-05-09	2010-05-24	2010-06-17	2010-08-25
	2010-05-09	2010-05-24	2010-06-18	2010-08-25
	2010-05-09	2010-05-24	2010-06-18	2010-08-25
	2010-05-09	2010-05-23	2010-06-18	2010-08-25
	2010-05-09	2010-05-24	2010-06-18	2010-08-25
	2010-05-09	2010-05-24	2010-06-18	2010-08-25
	2010-05-09	2010-05-24	2010-06-18	2010-08-25
	2010-05-09	2010-05-24	2010-06-18	2010-08-25
	2010-05-09	2010-05-24	2010-06-18	2010-08-25
	2010-05-09	2010-05-24	2010-06-18	2010-08-25
	2010-05-09	2010-05-24	2010-06-18	2010-08-25
	2010-05-09	2010-05-23	2010-06-18	2010-08-25
	2010-05-09	2010-05-25	2010-06-18	2010-08-25
	2010-05-09	2010-05-25	2010-06-18	2010-08-25
	2010-05-09	2010-05-25	2010-06-18	2010-08-25
	2010-05-09	2010-05-24	2010-06-18	2010-08-24
	2010-05-09	2010-05-24	2010-06-17	2010-08-25
	2010-05-09	2010-05-24	2010-06-17	2010-08-25
	2010-05-09	2010-05-24	2010-06-19	2010-08-25
	2010-05-09	2010-05-25	2010-06-19	2010-08-25
	2010-05-09	2010-05-24	2010-06-17	2010-08-24
	2010-05-09	2010-05-24	2010-06-19	2010-08-24
	2010-05-09	2010-05-24	2010-06-19	2010-08-24
Maple Presto	2010-05-09	2010-05-23	2010-06-20	2010-08-20
	2010-05-09	2010-05-23	2010-06-20	2010-08-20
	2010-05-09	2010-05-25	2010-06-20	2010-08-20
	2010-05-09	2010-05-24	2010-06-20	2010-08-20
	2010-05-09	2010-05-25	2010-06-20	2010-08-20
	2010-05-09	2010-05-24	2010-06-20	2010-08-20
	2010-05-09	2010-05-25	2010-06-20	2010-08-20
	2010-05-09	2010-05-23	2010-06-20	2010-08-20
	2010-05-09	2010-05-23	2010-06-20	2010-08-20
	2010-05-09	2010-05-24	2010-06-20	2010-08-20
	2010-05-09	2010-05-25	2010-06-20	2010-08-20
	2010-05-09	2010-05-24	2010-06-20	2010-08-20
	2010-05-09	2010-05-23	2010-06-20	2010-08-20
	2010-05-09	2010-05-24	2010-06-20	2010-08-20
	2010-05-09	2010-05-24	2010-06-20	2010-08-20
	2010-05-09	2010-05-23	2010-06-20	2010-08-20
	2010-05-09	2010-05-25	2010-06-20	2010-08-21
	2010-05-09	2010-05-24	2010-06-20	2010-08-21
	2010-05-09	2010-05-25	2010-06-21	2010-08-21
	2010-05-09	2010-05-24	2010-06-20	2010-08-21
	2010-05-09	2010-05-25	2010-06-20	2010-08-21
	2010-05-09	2010-05-24	2010-06-20	2010-08-21
	2010-05-09	2010-05-24	2010-06-21	2010-08-21
	2010-05-09	2010-05-24	2010-06-20	2010-08-21
	2010-05-09	2010-05-24	2010-06-20	2010-08-21
	2010-05-09	2010-05-24	2010-06-20	2010-08-21
	2010-05-09	2010-05-24	2010-06-20	2010-08-21
	2010-05-09	2010-05-23	2010-06-20	2010-08-21
	2010-05-09	2010-05-23	2010-06-20	2010-08-21
	2010-05-09	2010-05-23	2010-06-20	2010-08-21
OAC Vision	2010-05-09	2010-05-23	2010-06-21	2010-08-25
	2010-05-09	2010-05-23	2010-06-21	2010-08-25
	2010-05-09	2010-05-23	2010-06-21	2010-08-25
	2010-05-09	2010-05-23	2010-06-21	2010-08-25
	2010-05-09	2010-05-23	2010-06-20	2010-08-25
	2010-05-09	2010-05-23	2010-06-21	2010-08-25
	2010-05-09	2010-05-23	2010-06-20	2010-08-25
	2010-05-09	2010-05-24	2010-06-21	2010-08-25
	2010-05-09	2010-05-24	2010-06-21	2010-08-25
	2010-05-09	2010-05-24	2010-06-21	2010-08-25
	2010-05-09	2010-05-23	2010-06-21	2010-08-25
	2010-05-09	2010-05-23	2010-06-21	2010-08-25
	2010-05-09	2010-05-23	2010-06-21	2010-08-25
	2010-05-09	2010-05-23	2010-06-21	2010-08-25
	2010-05-09	2010-05-23	2010-06-21	2010-08-25
	2010-05-09	2010-05-23	2010-06-21	2010-08-25
	2010-05-09	2010-05-23	2010-06-21	2010-08-25
	2010-05-09	2010-05-23	2010-06-21	2010-08-25
	2010-05-09	2010-05-23	2010-06-21	2010-08-25
	2010-05-09	2010-05-24	2010-06-21	2010-08-25
	2010-05-09	2010-05-24	2010-06-21	2010-08-25
	2010-05-09	2010-05-23	2010-06-21	2010-08-25
	2010-05-09	2010-05-24	2010-06-21	2010-08-25
	2010-05-09	2010-05-24	2010-06-21	2010-08-25
	2010-05-09	2010-05-23	2010-06-21	2010-08-25
	2010-05-09	2010-05-23	2010-06-21	2010-08-25
	2010-05-09	2010-05-23	2010-06-21	2010-08-25
	2010-05-09	2010-05-23	2010-06-21	2010-08-25
	2010-05-09	2010-05-23	2010-06-21	2010-08-25
	2010-05-09	2010-05-23	2010-06-21	2010-08-25
Heihe 28	2010-05-09	2010-05-23	2010-06-21	2010-08-25
	2010-05-09	2010-05-23	2010-06-21	2010-08-25
	2010-05-09	2010-05-23	2010-06-21	2010-08-25
	2010-05-09	2010-05-24	2010-06-21	2010-08-25
	2010-05-09	2010-05-24	2010-06-21	2010-08-25
	2010-05-09	2010-05-24	2010-06-21	2010-08-25
	2010-05-09	2010-05-24	2010-06-20	2010-08-25
	2010-05-09	2010-05-24	2010-06-20	2010-08-25
	2010-05-09	2010-05-24	2010-06-21	2010-08-25
	2010-05-09	2010-05-24	2010-06-21	2010-08-25
	2010-05-09	2010-05-23	2010-06-21	2010-08-25
	2010-05-09	2010-05-23	2010-06-21	2010-08-25
	2010-05-09	2010-05-24	2010-06-21	2010-08-25
	2010-05-09	2010-05-23	2010-06-21	2010-08-25
	2010-05-09	2010-05-24	2010-06-20	2010-08-25
	2010-05-09	2010-05-23	2010-06-21	2010-08-25
	2010-05-09	2010-05-23	2010-06-21	2010-08-25
	2010-05-09	2010-05-24	2010-06-21	2010-08-25
	2010-05-09	2010-05-23	2010-06-21	2010-08-25
	2010-05-09	2010-05-23	2010-06-21	2010-08-25
	2010-05-09	2010-05-24	2010-06-21	2010-08-25
	2010-05-09	2010-05-24	2010-06-21	2010-08-25
	2010-05-09	2010-05-24	2010-06-21	2010-08-24
	2010-05-09	2010-05-23	2010-06-21	2010-08-25
	2010-05-09	2010-05-23	2010-06-21	2010-08-24
	2010-05-09	2010-05-23	2010-06-21	2010-08-24
	2010-05-09	2010-05-23	2010-06-21	2010-08-24
	2010-05-09	2010-05-24	NA	NA
	2010-05-09	2010-05-24	NA	NA
	2010-05-09	2010-05-23	NA	NA
Beifeng 1	2010-05-09	2010-05-23	2010-06-21	2010-08-30
	2010-05-09	2010-05-23	2010-06-21	2010-08-30
	2010-05-09	2010-05-23	2010-06-21	2010-08-30
	2010-05-09	2010-05-24	2010-06-21	2010-08-30
	2010-05-09	2010-05-24	2010-06-21	2010-08-30
	2010-05-09	2010-05-24	2010-06-21	2010-08-30
	2010-05-09	2010-05-24	2010-06-21	2010-08-30
	2010-05-09	2010-05-24	2010-06-21	2010-08-30
	2010-05-09	2010-05-24	2010-06-21	2010-08-30
	2010-05-09	2010-05-24	2010-06-21	2010-08-31
	2010-05-09	2010-05-24	2010-06-21	2010-08-31
	2010-05-09	2010-05-24	2010-06-21	2010-08-31
	2010-05-09	2010-05-24	2010-06-21	2010-08-31
	2010-05-09	2010-05-24	2010-06-21	2010-08-31
	2010-05-09	2010-05-25	2010-06-21	2010-08-30
	2010-05-09	2010-05-23	2010-06-21	2010-08-30
	2010-05-09	2010-05-24	2010-06-21	2010-08-30
	2010-05-09	2010-05-24	2010-06-21	2010-08-30
	2010-05-09	2010-05-25	2010-06-21	2010-08-30
	2010-05-09	2010-05-24	2010-06-21	2010-08-30
	2010-05-09	2010-05-25	2010-06-21	2010-08-30
	2010-05-09	2010-05-25	2010-06-21	2010-08-30
	2010-05-09	2010-05-24	2010-06-21	2010-08-30
	2010-05-09	2010-05-24	2010-06-21	2010-08-30
	2010-05-09	2010-05-24	2010-06-21	2010-08-30
	2010-05-09	2010-05-24	2010-06-21	2010-08-30
	2010-05-09	2010-05-24	2010-06-21	2010-08-30
	2010-05-09	2010-05-24	2010-06-21	2010-08-30
	2010-05-09	2010-05-24	2010-06-21	2010-08-30
	2010-05-09	2010-05-24	2010-06-21	2010-08-30
Heihe 11	2010-05-09	2010-05-24	2010-06-25	2010-08-30
	2010-05-09	2010-05-24	2010-06-25	2010-08-30
	2010-05-09	2010-05-23	2010-06-26	2010-08-30
	2010-05-09	2010-05-23	2010-06-25	2010-08-30
	2010-05-09	2010-05-23	2010-06-25	2010-08-30
	2010-05-09	2010-05-24	2010-06-25	2010-08-30
	2010-05-09	2010-05-23	2010-06-25	2010-08-30
	2010-05-09	2010-05-24	2010-06-25	2010-08-30
	2010-05-09	2010-05-24	2010-06-25	2010-08-31
	2010-05-09	2010-05-24	2010-06-25	2010-08-31
	2010-05-09	2010-05-24	2010-06-25	2010-08-30
	2010-05-09	2010-05-24	2010-06-25	2010-08-30
	2010-05-09	2010-05-23	2010-06-25	2010-08-31
	2010-05-09	2010-05-23	2010-06-25	2010-08-30
	2010-05-09	2010-05-23	2010-06-25	2010-08-30
	2010-05-09	2010-05-24	2010-06-25	2010-08-31
	2010-05-09	2010-05-24	2010-06-25	2010-08-31
	2010-05-09	2010-05-23	2010-06-25	2010-08-31
	2010-05-09	2010-05-24	2010-06-25	2010-08-30
	2010-05-09	2010-05-24	2010-06-25	2010-08-30
	2010-05-09	2010-05-25	2010-06-25	2010-08-30
	2010-05-09	2010-05-25	2010-06-25	2010-09-01
	2010-05-09	2010-05-24	2010-06-25	2010-09-01
	2010-05-09	2010-05-25	2010-06-25	2010-09-01
	2010-05-09	2010-05-24	2010-06-25	2010-09-01
	2010-05-09	2010-05-25	2010-06-25	2010-09-01
	2010-05-09	2010-05-24	2010-06-25	2010-09-01
	2010-05-09	2010-05-24	2010-06-25	2010-08-30
	2010-05-09	2010-05-24	2010-06-25	2010-08-30
	2010-05-09	2010-05-24	2010-06-25	2010-08-30
Amur 283	2010-05-09	2010-05-25	2010-06-26	2010-09-05
	2010-05-09	2010-05-25	2010-06-26	2010-09-06
	2010-05-09	2010-05-24	2010-06-27	2010-09-06
	2010-05-09	2010-05-25	2010-06-26	2010-09-06
	2010-05-09	2010-05-25	2010-06-27	2010-09-05
	2010-05-09	2010-05-24	2010-06-27	2010-09-05
	2010-05-09	2010-05-25	2010-06-27	2010-09-05
	2010-05-09	2010-05-25	2010-06-26	2010-09-05
	2010-05-09	2010-05-24	2010-06-27	2010-09-05
	2010-05-09	2010-05-25	2010-06-27	2010-09-05
	2010-05-09	2010-05-25	2010-06-27	2010-09-05
	2010-05-09	2010-05-25	2010-06-27	2010-09-05
	2010-05-09	2010-05-25	2010-06-26	2010-09-05
	2010-05-09	2010-05-24	2010-06-27	2010-09-05
	2010-05-09	2010-05-25	2010-06-27	2010-09-05
	2010-05-09	2010-05-25	2010-06-27	2010-09-05
	2010-05-09	2010-05-25	2010-06-27	2010-09-05
	2010-05-09	2010-05-24	2010-06-26	2010-09-05
	2010-05-09	2010-05-25	2010-06-27	2010-09-06
	2010-05-09	2010-05-25	2010-06-27	2010-09-06
	2010-05-09	2010-05-24	2010-06-27	2010-09-06
	2010-05-09	2010-05-25	2010-06-27	2010-09-06
	2010-05-09	2010-05-25	2010-06-26	2010-09-06
	2010-05-09	2010-05-25	2010-06-28	2010-09-06
	2010-05-09	2010-05-24	2010-06-25	2010-09-05
	2010-05-09	2010-05-24	2010-06-26	2010-09-04
	2010-05-09	2010-05-25	2010-06-26	2010-09-05
	2010-05-09	2010-05-25	2010-06-26	2010-09-05
	2010-05-09	NA	NA	NA
	2010-05-09	NA	NA	NA
Beidou 8	2010-05-09	2010-05-25	2010-06-27	2010-09-09
	2010-05-09	2010-05-24	2010-06-27	2010-09-09
	2010-05-09	2010-05-25	2010-06-27	2010-09-09
	2010-05-09	2010-05-25	2010-06-27	2010-09-09
	2010-05-09	2010-05-26	2010-06-27	2010-09-09
	2010-05-09	2010-05-26	2010-06-27	2010-09-09
	2010-05-09	2010-05-25	2010-06-27	2010-09-09
	2010-05-09	2010-05-25	2010-06-27	2010-09-09
	2010-05-09	2010-05-25	2010-06-27	2010-09-07
	2010-05-09	2010-05-24	2010-06-27	2010-09-07
	2010-05-09	2010-05-24	2010-06-27	2010-09-09
	2010-05-09	2010-05-25	2010-06-27	2010-09-08
	2010-05-09	2010-05-25	2010-06-27	2010-09-08
	2010-05-09	2010-05-24	2010-06-27	2010-09-08
	2010-05-09	2010-05-23	2010-06-27	2010-09-07
	2010-05-09	2010-05-23	2010-06-26	2010-09-07
	2010-05-09	2010-05-26	2010-06-27	2010-09-09
	2010-05-09	2010-05-26	2010-06-25	2010-09-08
	2010-05-09	2010-05-26	2010-06-27	2010-09-08
	2010-05-09	2010-05-25	2010-06-27	2010-09-08
	2010-05-09	2010-05-25	2010-06-27	2010-09-09
	2010-05-09	2010-05-25	2010-06-27	2010-09-08
	2010-05-09	2010-05-25	2010-06-27	2010-09-08
	2010-05-09	2010-05-25	2010-06-27	2010-09-09
	2010-05-09	2010-05-25	2010-06-27	2010-09-09
	2010-05-09	2010-05-25	2010-06-27	2010-09-07
	2010-05-09	2010-05-25	2010-06-27	2010-09-07
	2010-05-09	2010-05-25	2010-06-27	2010-09-08
	2010-05-09	NA	NA	NA
	2010-05-09	NA	NA	NA
Heihe 20	2010-05-09	2010-05-23	2010-06-23	2010-08-25
	2010-05-09	2010-05-24	2010-06-23	2010-08-24
	2010-05-09	2010-05-26	2010-06-23	2010-08-24
	2010-05-09	2010-05-23	2010-06-23	2010-08-24
	2010-05-09	2010-05-26	2010-06-22	2010-08-25
	2010-05-09	2010-05-23	2010-06-22	2010-08-26
	2010-05-09	2010-05-26	2010-06-22	2010-08-25
	2010-05-09	2010-05-23	2010-06-22	2010-08-25
	2010-05-09	2010-05-24	2010-06-22	2010-08-24
	2010-05-09	2010-05-24	2010-06-22	2010-08-24
	2010-05-09	2010-05-23	2010-06-22	2010-08-26
	2010-05-09	2010-05-23	2010-06-22	2010-08-24
	2010-05-09	2010-05-23	2010-06-22	2010-08-26
	2010-05-09	2010-05-23	2010-06-22	2010-08-24
	2010-05-09	2010-05-25	2010-06-23	2010-08-25
	2010-05-09	2010-05-24	2010-06-23	2010-08-25
	2010-05-09	2010-05-23	2010-06-23	2010-08-24
	2010-05-09	2010-05-24	2010-06-23	2010-08-24
	2010-05-09	2010-05-24	2010-06-23	2010-08-26
	2010-05-09	2010-05-23	2010-06-23	2010-08-24
	2010-05-09	2010-05-23	2010-06-23	2010-08-24
	2010-05-09	2010-05-24	2010-06-23	2010-08-25
	2010-05-09	2010-05-24	2010-06-23	2010-08-25
	2010-05-09	2010-05-23	2010-06-23	2010-08-24
	2010-05-09	2010-05-24	2010-06-23	2010-08-24
	2010-05-09	2010-05-24	2010-06-23	2010-08-26
	2010-05-09	2010-05-23	2010-06-23	2010-08-24
	2010-05-09	2010-05-23	2010-06-22	2010-08-26
	2010-05-09	2010-05-24	2010-06-22	2010-08-24
	2010-05-09	2010-05-23	2010-06-23	2010-08-25
Dongnong 40	2010-05-09	2010-05-24	2010-06-24	2010-08-30
	2010-05-09	2010-05-24	2010-06-24	2010-08-30
	2010-05-09	2010-05-25	2010-06-24	2010-08-30
	2010-05-09	2010-05-25	2010-06-24	2010-08-30
	2010-05-09	2010-05-24	2010-06-24	2010-08-30
	2010-05-09	2010-05-23	2010-06-23	2010-08-30
	2010-05-09	2010-05-23	2010-06-22	2010-08-30
	2010-05-09	2010-05-24	2010-06-24	2010-08-30
	2010-05-09	2010-05-25	2010-06-24	2010-08-30
	2010-05-09	2010-05-24	2010-06-24	2010-08-30
	2010-05-09	2010-05-25	2010-06-24	2010-08-30
	2010-05-09	2010-05-24	2010-06-24	2010-08-30
	2010-05-09	2010-05-26	2010-06-24	2010-08-30
	2010-05-09	2010-05-23	2010-06-24	2010-08-30
	2010-05-09	2010-05-24	2010-06-24	2010-08-30
	2010-05-09	2010-05-24	2010-06-24	2010-08-30
	2010-05-09	2010-05-25	2010-06-24	2010-08-30
	2010-05-09	2010-05-25	2010-06-24	2010-08-30
	2010-05-09	2010-05-25	2010-06-24	2010-08-30
	2010-05-09	2010-05-23	2010-06-24	2010-08-30
	2010-05-09	2010-05-23	2010-06-24	2010-08-30
	2010-05-09	2010-05-23	2010-06-24	2010-08-30
	2010-05-09	2010-05-24	2010-06-24	2010-08-30
	2010-05-09	2010-05-25	2010-06-24	2010-08-30
	2010-05-09	2010-05-24	2010-06-24	2010-08-30
	2010-05-09	2010-05-25	2010-06-24	2010-08-30
	2010-05-09	2010-05-24	2010-06-24	2010-08-30
	2010-05-09	2010-05-23	2010-06-24	2010-08-30
	2010-05-09	2010-05-26	2010-06-24	2010-08-30
	2010-05-09	2010-05-25	2010-06-24	2010-08-30
Dongnong 41	2010-05-09	2010-05-25	2010-06-24	2010-08-17
	2010-05-09	2010-05-26	2010-06-24	2010-08-17
	2010-05-09	2010-05-24	2010-06-24	2010-08-17
	2010-05-09	2010-05-26	2010-06-24	2010-08-17
	2010-05-09	2010-05-24	2010-06-24	2010-08-17
	2010-05-09	2010-05-25	2010-06-24	2010-08-17
	2010-05-09	2010-05-25	2010-06-24	2010-08-17
	2010-05-09	2010-05-24	2010-06-24	2010-08-17
	2010-05-09	2010-05-25	2010-06-24	2010-08-17
	2010-05-09	2010-05-24	2010-06-24	2010-08-17
	2010-05-09	2010-05-24	2010-06-24	2010-08-17
	2010-05-09	2010-05-24	2010-06-24	2010-08-17
	2010-05-09	2010-05-25	2010-06-24	2010-08-17
	2010-05-09	2010-05-24	2010-06-24	2010-08-17
	2010-05-09	2010-05-25	2010-06-24	2010-08-17
	2010-05-09	2010-05-26	2010-06-23	2010-08-17
	2010-05-09	2010-05-26	2010-06-24	2010-08-17
	2010-05-09	2010-05-25	2010-06-24	2010-08-17
	2010-05-09	2010-05-26	2010-06-24	2010-08-17
	2010-05-09	2010-05-25	2010-06-23	2010-08-17
	2010-05-09	2010-05-24	2010-06-23	2010-08-17
	2010-05-09	2010-05-24	2010-06-24	2010-08-16
	2010-05-09	2010-05-26	2010-06-23	2010-08-16
	2010-05-09	2010-05-24	2010-06-24	2010-08-18
	2010-05-09	2010-05-24	2010-06-24	2010-08-17
	2010-05-09	2010-05-25	2010-06-24	2010-08-18
	2010-05-09	2010-05-25	2010-06-24	2010-08-18
	2010-05-09	2010-05-23	2010-06-24	2010-08-18
	2010-05-09	NA	NA	NA
	2010-05-09	NA	NA	NA
Kennong 8	2010-05-09	2010-05-24	2010-06-25	2010-08-24
	2010-05-09	2010-05-24	2010-06-25	2010-08-24
	2010-05-09	2010-05-24	2010-06-25	2010-08-24
	2010-05-09	2010-05-24	2010-06-25	2010-08-24
	2010-05-09	2010-05-25	2010-06-25	2010-08-24
	2010-05-09	2010-05-25	2010-06-25	2010-08-23
	2010-05-09	2010-05-23	2010-06-25	2010-08-23
	2010-05-09	2010-05-24	2010-06-25	2010-08-23
	2010-05-09	2010-05-24	2010-06-25	2010-08-24
	2010-05-09	2010-05-24	2010-06-25	2010-08-24
	2010-05-09	2010-05-24	2010-06-25	2010-08-24
	2010-05-09	2010-05-25	2010-06-25	2010-08-24
	2010-05-09	2010-05-24	2010-06-25	2010-08-24
	2010-05-09	2010-05-25	2010-06-25	2010-08-24
	2010-05-09	2010-05-24	2010-06-25	2010-08-24
	2010-05-09	2010-05-24	2010-06-24	2010-08-24
	2010-05-09	2010-05-23	2010-06-24	2010-08-24
	2010-05-09	2010-05-24	2010-06-24	2010-08-24
	2010-05-09	2010-05-25	2010-06-24	2010-08-24
	2010-05-09	2010-05-25	2010-06-24	2010-08-24
	2010-05-09	2010-05-25	2010-06-25	2010-08-24
	2010-05-09	2010-05-24	2010-06-25	2010-08-24
	2010-05-09	2010-05-24	2010-06-24	2010-08-23
	2010-05-09	2010-05-24	2010-06-24	2010-08-23
	2010-05-09	2010-05-24	2010-06-24	2010-08-24
	2010-05-09	2010-05-24	2010-06-24	2010-08-24
	2010-05-09	2010-05-25	2010-06-24	2010-08-24
	2010-05-09	2010-05-24	2010-06-24	2010-08-24
	2010-05-09	2010-05-24	2010-06-24	2010-08-24
	2010-05-09	NA	NA	NA
Canatto	2010-05-09	2010-05-24	2010-06-28	2010-08-30
	2010-05-09	2010-05-25	2010-06-28	2010-08-30
	2010-05-09	2010-05-23	2010-06-28	2010-08-29
	2010-05-09	2010-05-23	2010-06-28	2010-08-29
	2010-05-09	2010-05-24	2010-06-28	2010-08-29
	2010-05-09	2010-05-24	2010-06-28	2010-08-30
	2010-05-09	2010-05-24	2010-06-28	2010-08-30
	2010-05-09	2010-05-24	2010-06-28	2010-08-29
	2010-05-09	2010-05-24	2010-06-27	2010-08-31
	2010-05-09	2010-05-24	2010-06-27	2010-08-29
	2010-05-09	2010-05-24	2010-06-28	2010-08-30
	2010-05-09	2010-05-24	2010-06-28	2010-08-30
	2010-05-09	2010-05-24	2010-06-28	2010-08-29
	2010-05-09	2010-05-24	2010-06-28	2010-08-29
	2010-05-09	2010-05-23	2010-06-28	2010-08-29
	2010-05-09	2010-05-24	2010-06-28	2010-08-30
	2010-05-09	2010-05-22	2010-06-28	2010-08-30
	2010-05-09	2010-05-25	2010-06-28	2010-08-30
	2010-05-09	2010-05-23	2010-06-28	2010-08-30
	2010-05-09	2010-05-24	2010-06-28	2010-08-29
	2010-05-09	2010-05-24	2010-06-28	2010-08-29
	2010-05-09	2010-05-24	2010-06-28	2010-08-29
	2010-05-09	2010-05-24	2010-06-28	2010-08-29
	2010-05-09	2010-05-22	2010-06-28	2010-08-30
	2010-05-09	2010-05-23	2010-06-28	2010-08-30
	2010-05-09	2010-05-24	2010-06-28	2010-08-29
	2010-05-09	2010-05-24	2010-06-28	2010-08-29
	2010-05-09	2010-05-24	2010-06-28	2010-08-30
	2010-05-09	2010-05-24	2010-06-28	2010-08-30
	2010-05-09	2010-05-24	2010-06-28	2010-08-29
Glacier	2010-05-09	2010-05-24	2010-06-28	2010-09-08
	2010-05-09	2010-05-24	2010-06-28	2010-09-08
	2010-05-09	2010-05-23	2010-06-28	2010-09-08
	2010-05-09	2010-05-23	2010-06-27	2010-09-08
	2010-05-09	2010-05-22	2010-06-27	2010-09-08
	2010-05-09	2010-05-23	2010-06-28	2010-09-08
	2010-05-09	2010-05-24	2010-06-28	2010-09-07
	2010-05-09	2010-05-24	2010-06-28	2010-09-08
	2010-05-09	2010-05-24	2010-06-28	2010-09-08
	2010-05-09	2010-05-23	2010-06-27	2010-09-08
	2010-05-09	2010-05-23	2010-06-28	2010-09-08
	2010-05-09	2010-05-22	2010-06-28	2010-09-08
	2010-05-09	2010-05-22	2010-06-28	2010-09-08
	2010-05-09	2010-05-25	2010-06-28	2010-09-07
	2010-05-09	2010-05-24	2010-06-27	2010-09-08
	2010-05-09	2010-05-24	2010-06-27	2010-09-08
	2010-05-09	2010-05-23	2010-06-28	2010-09-07
	2010-05-09	2010-05-24	2010-06-28	2010-09-07
	2010-05-09	2010-05-24	2010-06-28	2010-09-07
	2010-05-09	2010-05-22	2010-06-28	2010-09-08
	2010-05-09	2010-05-23	2010-06-28	2010-09-08
	2010-05-09	2010-05-24	2010-06-28	2010-09-07
	2010-05-09	2010-05-24	2010-06-28	2010-09-08
	2010-05-09	2010-05-24	2010-06-27	2010-09-08
	2010-05-09	2010-05-24	2010-06-28	2010-09-08
	2010-05-09	2010-05-22	2010-06-28	2010-09-08
	2010-05-09	2010-05-23	2010-06-27	2010-09-08
	2010-05-09	2010-05-23	2010-06-28	2010-09-07
	2010-05-09	2010-05-25	2010-06-28	2010-09-07
	2010-05-09	2010-05-24	2010-06-28	2010-09-08
Heihe 12	2010-05-09	2010-05-24	2010-06-25	2010-08-27
	2010-05-09	2010-05-24	2010-06-25	2010-08-27
	2010-05-09	2010-05-23	2010-06-25	2010-08-27
	2010-05-09	2010-05-24	2010-06-25	2010-08-25
	2010-05-09	2010-05-24	2010-06-25	2010-08-25
	2010-05-09	2010-05-24	2010-06-25	2010-08-27
	2010-05-09	2010-05-24	2010-06-25	2010-08-27
	2010-05-09	2010-05-24	2010-06-25	2010-08-26
	2010-05-09	2010-05-24	2010-06-25	2010-08-27
	2010-05-09	2010-05-24	2010-06-24	2010-08-27
	2010-05-09	2010-05-24	2010-06-25	2010-08-27
	2010-05-09	2010-05-25	2010-06-25	2010-08-26
	2010-05-09	2010-05-25	2010-06-24	2010-08-26
	2010-05-09	2010-05-24	2010-06-24	2010-08-27
	2010-05-09	2010-05-24	2010-06-24	2010-08-27
	2010-05-09	2010-05-24	2010-06-25	2010-08-27
	2010-05-09	2010-05-24	2010-06-24	2010-08-27
	2010-05-09	2010-05-24	2010-06-24	2010-08-26
	2010-05-09	2010-05-24	2010-06-25	2010-08-27
	2010-05-09	2010-05-23	2010-06-25	2010-08-27
	2010-05-09	2010-05-23	2010-06-25	2010-08-26
	2010-05-09	2010-05-24	2010-06-25	2010-08-27
	2010-05-09	2010-05-24	2010-06-24	2010-08-27
	2010-05-09	2010-05-24	2010-06-25	2010-08-27
	2010-05-09	2010-05-24	2010-06-24	2010-08-26
	2010-05-09	2010-05-25	2010-06-25	2010-08-26
	2010-05-09	2010-05-25	2010-06-25	2010-08-26
	2010-05-09	2010-05-24	2010-06-25	2010-08-27
	2010-05-09	2010-05-24	2010-06-25	2010-08-27
	2010-05-09	2010-05-24	2010-06-25	2010-08-27
Heihe 3	2010-05-09	2010-05-24	2010-06-24	2010-09-04
	2010-05-09	2010-05-25	2010-06-24	2010-09-04
	2010-05-09	2010-05-25	2010-06-24	2010-09-04
	2010-05-09	2010-05-25	2010-06-24	2010-09-04
	2010-05-09	2010-05-25	2010-06-24	2010-09-04
	2010-05-09	2010-05-25	2010-06-25	2010-09-04
	2010-05-09	2010-05-25	2010-06-25	2010-09-03
	2010-05-09	2010-05-25	2010-06-25	2010-09-03
	2010-05-09	2010-05-25	2010-06-25	2010-09-03
	2010-05-09	2010-05-23	2010-06-25	2010-09-03
	2010-05-09	2010-05-25	2010-06-25	2010-09-03
	2010-05-09	2010-05-25	2010-06-25	2010-09-04
	2010-05-09	2010-05-25	2010-06-25	2010-09-03
	2010-05-09	2010-05-25	2010-06-25	2010-09-03
	2010-05-09	2010-05-25	2010-06-25	2010-09-04
	2010-05-09	2010-05-24	2010-06-24	2010-09-04
	2010-05-09	2010-05-23	2010-06-24	2010-09-04
	2010-05-09	2010-05-25	2010-06-24	2010-09-03
	2010-05-09	2010-05-25	2010-06-24	2010-09-03
	2010-05-09	2010-05-25	2010-06-24	2010-09-04
	2010-05-09	2010-05-24	2010-06-24	2010-09-04
	2010-05-09	2010-05-24	2010-06-24	2010-09-04
	2010-05-09	2010-05-23	2010-06-24	2010-09-04
	2010-05-09	2010-05-23	2010-06-24	2010-09-04
	2010-05-09	2010-05-25	2010-06-24	2010-09-04
	2010-05-09	2010-05-23	2010-06-24	2010-09-04
	2010-05-09	2010-05-23	2010-06-24	2010-09-04
	2010-05-09	2010-05-23	2010-06-24	2010-09-04
	2010-05-09	2010-05-23	2010-06-24	2010-09-04
	2010-05-09	2010-05-23	2010-06-24	2010-09-04
Heihe 8	2010-05-09	2010-05-23	2010-06-24	2010-08-30
	2010-05-09	2010-05-24	2010-06-24	2010-08-30
	2010-05-09	2010-05-25	2010-06-24	2010-08-30
	2010-05-09	2010-05-25	2010-06-24	2010-08-30
	2010-05-09	2010-05-24	2010-06-24	2010-08-29
	2010-05-09	2010-05-24	2010-06-24	2010-08-30
	2010-05-09	2010-05-25	2010-06-24	2010-08-30
	2010-05-09	2010-05-25	2010-06-23	2010-08-30
	2010-05-09	2010-05-23	2010-06-24	2010-08-30
	2010-05-09	2010-05-23	2010-06-23	2010-08-30
	2010-05-09	2010-05-25	2010-06-24	2010-08-29
	2010-05-09	2010-05-25	2010-06-23	2010-08-30
	2010-05-09	2010-05-25	2010-06-24	2010-08-30
	2010-05-09	2010-05-24	2010-06-24	2010-08-30
	2010-05-09	2010-05-24	2010-06-24	2010-08-30
	2010-05-09	2010-05-23	2010-06-24	2010-08-30
	2010-05-09	2010-05-25	2010-06-24	2010-08-30
	2010-05-09	2010-05-24	2010-06-24	2010-08-30
	2010-05-09	2010-05-25	2010-06-24	2010-08-30
	2010-05-09	2010-05-25	2010-06-24	2010-08-30
	2010-05-09	2010-05-25	2010-06-24	2010-08-29
	2010-05-09	2010-05-23	2010-06-24	2010-08-30
	2010-05-09	2010-05-24	2010-06-24	2010-08-28
	2010-05-09	2010-05-25	2010-06-24	2010-08-28
	2010-05-09	2010-05-25	2010-06-24	2010-08-28
	2010-05-09	2010-05-24	2010-06-24	2010-08-30
	2010-05-09	2010-05-24	2010-06-24	2010-08-30
	2010-05-09	2010-05-25	2010-06-24	2010-08-30
	2010-05-09	2010-05-25	2010-06-24	2010-08-30
	2010-05-09	2010-05-26	NA	NA
Bei 02-7495	2010-05-09	2010-05-24	2010-06-26	2010-09-02
	2010-05-09	2010-05-23	2010-06-26	2010-09-02
	2010-05-09	2010-05-24	2010-06-25	2010-09-02
	2010-05-09	2010-05-24	2010-06-25	2010-09-02
	2010-05-09	2010-05-24	2010-06-26	2010-09-02
	2010-05-09	2010-05-24	2010-06-25	2010-09-02
	2010-05-09	2010-05-25	2010-06-25	2010-09-03
	2010-05-09	2010-05-23	2010-06-25	2010-09-03
	2010-05-09	2010-05-23	2010-06-25	2010-09-02
	2010-05-09	2010-05-24	2010-06-24	2010-09-02
	2010-05-09	2010-05-23	2010-06-25	2010-09-02
	2010-05-09	2010-05-23	2010-06-24	2010-09-02
	2010-05-09	2010-05-24	2010-06-26	2010-09-02
	2010-05-09	2010-05-23	2010-06-26	2010-09-02
	2010-05-09	2010-05-24	2010-06-26	2010-09-02
	2010-05-09	2010-05-24	2010-06-26	2010-09-03
	2010-05-09	2010-05-24	2010-06-26	2010-09-03
	2010-05-09	2010-05-24	2010-06-25	2010-09-02
	2010-05-09	2010-05-24	2010-06-26	2010-09-02
	2010-05-09	2010-05-24	2010-06-25	2010-09-02
	2010-05-09	2010-05-25	2010-06-25	2010-09-02
	2010-05-09	2010-05-25	2010-06-25	2010-09-02
	2010-05-09	2010-05-25	2010-06-25	2010-09-02
	2010-05-09	2010-05-24	2010-06-25	2010-09-02
	2010-05-09	2010-05-24	2010-06-26	2010-09-02
	2010-05-09	2010-05-24	2010-06-25	2010-09-02
	2010-05-09	2010-05-23	2010-06-26	2010-09-02
	2010-05-09	2010-05-23	2010-06-26	2010-09-02
	2010-05-09	2010-05-23	2010-06-26	2010-09-02
	2010-05-09	2010-05-24	2010-06-26	2010-09-02
Heihe 7	2010-05-09	2010-05-23	2010-06-23	2010-08-30
	2010-05-09	2010-05-23	2010-06-23	2010-08-30
	2010-05-09	2010-05-25	2010-06-22	2010-08-30
	2010-05-09	2010-05-25	2010-06-21	2010-08-30
	2010-05-09	2010-05-23	2010-06-23	2010-08-30
	2010-05-09	2010-05-23	2010-06-23	2010-08-30
	2010-05-09	2010-05-25	2010-06-22	2010-08-30
	2010-05-09	2010-05-24	2010-06-23	2010-08-30
	2010-05-09	2010-05-25	2010-06-22	2010-08-30
	2010-05-09	2010-05-24	2010-06-23	2010-08-30
	2010-05-09	2010-05-26	2010-06-23	2010-08-30
	2010-05-09	2010-05-24	2010-06-22	2010-08-30
	2010-05-09	2010-05-23	2010-06-23	2010-08-30
	2010-05-09	2010-05-23	2010-06-23	2010-08-30
	2010-05-09	2010-05-23	2010-06-22	2010-08-30
	2010-05-09	2010-05-23	2010-06-23	2010-08-31
	2010-05-09	2010-05-24	2010-06-23	2010-08-31
	2010-05-09	2010-05-24	2010-06-23	2010-08-31
	2010-05-09	2010-05-24	2010-06-23	2010-08-30
	2010-05-09	2010-05-23	2010-06-23	2010-08-30
	2010-05-09	2010-05-23	2010-06-23	2010-08-30
	2010-05-09	2010-05-23	2010-06-22	2010-08-30
	2010-05-09	2010-05-25	2010-06-24	2010-08-31
	2010-05-09	2010-05-25	2010-06-23	2010-08-30
	2010-05-09	2010-05-23	2010-06-22	2010-08-30
	2010-05-09	2010-05-23	2010-06-22	2010-08-30
	2010-05-09	2010-05-25	2010-06-23	2010-08-30
	2010-05-09	2010-05-23	2010-06-23	2010-08-30
	2010-05-09	2010-05-23	2010-06-23	2010-08-30
	2010-05-09	2010-05-25	2010-06-23	2010-08-30
Heihe 5	2010-05-09	2010-05-23	2010-06-23	2010-09-08
	2010-05-09	2010-05-24	2010-06-22	2010-09-08
	2010-05-09	2010-05-25	2010-06-23	2010-09-08
	2010-05-09	2010-05-22	2010-06-21	2010-09-08
	2010-05-09	2010-05-23	2010-06-22	2010-09-08
	2010-05-09	2010-05-25	2010-06-23	2010-09-07
	2010-05-09	2010-05-25	2010-06-22	2010-09-07
	2010-05-09	2010-05-25	2010-06-23	2010-09-07
	2010-05-09	2010-05-22	2010-06-22	2010-09-08
	2010-05-09	2010-05-23	2010-06-23	2010-09-08
	2010-05-09	2010-05-24	2010-06-22	2010-09-08
	2010-05-09	2010-05-23	2010-06-23	2010-09-08
	2010-05-09	2010-05-22	2010-06-23	2010-09-07
	2010-05-09	2010-05-22	2010-06-23	2010-09-07
	2010-05-09	2010-05-24	2010-06-22	2010-09-06
	2010-05-09	2010-05-24	2010-06-22	2010-09-08
	2010-05-09	2010-05-24	2010-06-23	2010-09-08
	2010-05-09	2010-05-23	2010-06-22	2010-09-08
	2010-05-09	2010-05-22	2010-06-22	2010-09-07
	2010-05-09	2010-05-23	2010-06-21	2010-09-08
	2010-05-09	2010-05-26	2010-06-23	2010-09-08
	2010-05-09	2010-05-25	2010-06-22	2010-09-08
	2010-05-09	2010-05-23	2010-06-21	2010-09-08
	2010-05-09	2010-05-22	2010-06-23	2010-09-08
	2010-05-09	2010-05-25	2010-06-22	2010-09-08
	2010-05-09	2010-05-23	2010-06-23	2010-09-08
	2010-05-09	2010-05-22	2010-06-23	2010-09-07
	2010-05-09	2010-05-22	2010-06-22	2010-09-07
	2010-05-09	2010-05-23	2010-06-23	2010-09-08
	2010-05-09	2010-05-25	2010-06-23	2010-09-08
Heihe 35	2010-05-09	2010-05-23	2010-06-23	2010-08-24
	2010-05-09	2010-05-23	2010-06-23	2010-08-24
	2010-05-09	2010-05-23	2010-06-23	2010-08-24
	2010-05-09	2010-05-23	2010-06-23	2010-08-23
	2010-05-09	2010-05-24	2010-06-22	2010-08-23
	2010-05-09	2010-05-26	2010-06-22	2010-08-24
	2010-05-09	2010-05-25	2010-06-22	2010-08-24
	2010-05-09	2010-05-25	2010-06-21	2010-08-24
	2010-05-09	2010-05-23	2010-06-22	2010-08-24
	2010-05-09	2010-05-23	2010-06-22	2010-08-22
	2010-05-09	2010-05-24	2010-06-23	2010-08-23
	2010-05-09	2010-05-25	2010-06-22	2010-08-24
	2010-05-09	2010-05-23	2010-06-22	2010-08-24
	2010-05-09	2010-05-25	2010-06-22	2010-08-24
	2010-05-09	2010-05-23	2010-06-22	2010-08-24
	2010-05-09	2010-05-23	2010-06-22	2010-08-24
	2010-05-09	2010-05-23	2010-06-22	2010-08-24
	2010-05-09	2010-05-22	2010-06-22	2010-08-23
	2010-05-09	2010-05-24	2010-06-22	2010-08-24
	2010-05-09	2010-05-26	2010-06-22	2010-08-24
	2010-05-09	2010-05-26	2010-06-22	2010-08-24
	2010-05-09	2010-05-26	2010-06-22	2010-08-24
	2010-05-09	2010-05-25	2010-06-22	2010-08-22
	2010-05-09	2010-05-23	2010-06-22	2010-08-22
	2010-05-09	2010-05-24	2010-06-22	2010-08-22
	2010-05-09	2010-05-24	2010-06-23	2010-08-24
	2010-05-09	2010-05-25	2010-06-22	2010-08-24
	2010-05-09	2010-05-24	2010-06-22	2010-08-24
	2010-05-09	2010-05-24	2010-06-22	2010-08-24
	2010-05-09	2010-05-23	2010-06-23	2010-08-24
Heihe 41	2010-05-09	2010-05-23	2010-06-22	2010-08-22
	2010-05-09	2010-05-25	2010-06-23	2010-08-22
	2010-05-09	2010-05-23	2010-06-23	2010-08-25
	2010-05-09	2010-05-23	2010-06-23	2010-08-25
	2010-05-09	2010-05-26	2010-06-23	2010-08-25
	2010-05-09	2010-05-25	2010-06-23	2010-08-25
	2010-05-09	2010-05-23	2010-06-23	2010-08-22
	2010-05-09	2010-05-25	2010-06-23	2010-08-23
	2010-05-09	2010-05-24	2010-06-23	2010-08-23
	2010-05-09	2010-05-23	2010-06-22	2010-08-23
	2010-05-09	2010-05-23	2010-06-23	2010-08-23
	2010-05-09	2010-05-23	2010-06-23	2010-08-25
	2010-05-09	2010-05-25	2010-06-23	2010-08-24
	2010-05-09	2010-05-23	2010-06-23	2010-08-24
	2010-05-09	2010-05-23	2010-06-22	2010-08-23
	2010-05-09	2010-05-24	2010-06-22	2010-08-23
	2010-05-09	2010-05-25	2010-06-22	2010-08-23
	2010-05-09	2010-05-23	2010-06-22	2010-08-23
	2010-05-09	2010-05-23	2010-06-22	2010-08-23
	2010-05-09	2010-05-25	2010-06-22	2010-08-23
	2010-05-09	2010-05-24	2010-06-22	2010-08-23
	2010-05-09	2010-05-24	2010-06-22	2010-08-23
	2010-05-09	2010-05-23	2010-06-20	2010-08-24
	2010-05-09	2010-05-25	2010-06-22	2010-08-24
	2010-05-09	2010-05-23	2010-06-23	2010-08-23
	2010-05-09	2010-05-25	2010-06-22	2010-08-23
	2010-05-09	2010-05-23	2010-06-22	2010-08-23
	2010-05-09	2010-05-25	2010-06-23	2010-08-24
	2010-05-09	2010-05-23	2010-06-23	2010-08-23
	2010-05-09	2010-05-23	2010-06-22	2010-08-23
Heihe 44	2010-05-09	2010-05-23	2010-06-21	2010-08-23
	2010-05-09	2010-05-25	2010-06-21	2010-08-23
	2010-05-09	2010-05-23	2010-06-21	2010-08-23
	2010-05-09	2010-05-23	2010-06-21	2010-08-23
	2010-05-09	2010-05-23	2010-06-21	2010-08-23
	2010-05-09	2010-05-24	2010-06-21	2010-08-23
	2010-05-09	2010-05-25	2010-06-21	2010-08-23
	2010-05-09	2010-05-24	2010-06-21	2010-08-24
	2010-05-09	2010-05-23	2010-06-21	2010-08-24
	2010-05-09	2010-05-24	2010-06-21	2010-08-23
	2010-05-09	2010-05-24	2010-06-21	2010-08-24
	2010-05-09	2010-05-24	2010-06-21	2010-08-23
	2010-05-09	2010-05-25	2010-06-21	2010-08-23
	2010-05-09	2010-05-24	2010-06-21	2010-08-23
	2010-05-09	2010-05-24	2010-06-21	2010-08-24
	2010-05-09	2010-05-23	2010-06-23	2010-08-23
	2010-05-09	2010-05-24	2010-06-22	2010-08-23
	2010-05-09	2010-05-23	2010-06-22	2010-08-23
	2010-05-09	2010-05-24	2010-06-21	2010-08-24
	2010-05-09	2010-05-23	2010-06-21	2010-08-23
	2010-05-09	2010-05-25	2010-06-21	2010-08-24
	2010-05-09	2010-05-25	2010-06-21	2010-08-23
	2010-05-09	2010-05-24	2010-06-21	2010-08-23
	2010-05-09	2010-05-23	2010-06-21	2010-08-23
	2010-05-09	2010-05-24	2010-06-21	2010-08-23
	2010-05-09	2010-05-23	2010-06-21	2010-08-23
	2010-05-09	2010-05-23	2010-06-21	2010-08-23
	2010-05-09	2010-05-24	2010-06-21	2010-08-23
	2010-05-09	2010-05-24	2010-06-21	2010-08-23
	2010-05-09	2010-05-23	2010-06-21	2010-08-23
Heihe 49	2010-05-09	2010-05-23	2010-06-19	2010-08-20
	2010-05-09	2010-05-24	2010-06-19	2010-08-20
	2010-05-09	2010-05-24	2010-06-19	2010-08-20
	2010-05-09	2010-05-24	2010-06-18	2010-08-20
	2010-05-09	2010-05-24	2010-06-18	2010-08-20
	2010-05-09	2010-05-23	2010-06-18	2010-08-20
	2010-05-09	2010-05-25	2010-06-20	2010-08-19
	2010-05-09	2010-05-24	2010-06-20	2010-08-19
	2010-05-09	2010-05-23	2010-06-20	2010-08-19
	2010-05-09	2010-05-24	2010-06-20	2010-08-21
	2010-05-09	2010-05-23	2010-06-20	2010-08-21
	2010-05-09	2010-05-23	2010-06-20	2010-08-21
	2010-05-09	2010-05-23	2010-06-20	2010-08-20
	2010-05-09	2010-05-23	2010-06-20	2010-08-20
	2010-05-09	2010-05-24	2010-06-20	2010-08-20
	2010-05-09	2010-05-24	2010-06-19	2010-08-20
	2010-05-09	2010-05-24	2010-06-19	2010-08-20
	2010-05-09	2010-05-23	2010-06-19	2010-08-20
	2010-05-09	2010-05-24	2010-06-19	2010-08-20
	2010-05-09	2010-05-24	2010-06-19	2010-08-21
	2010-05-09	2010-05-23	2010-06-19	2010-08-20
	2010-05-09	2010-05-25	2010-06-20	2010-08-20
	2010-05-09	2010-05-24	2010-06-20	2010-08-20
	2010-05-09	2010-05-23	2010-06-20	2010-08-20
	2010-05-09	2010-05-24	2010-06-20	2010-08-21
	2010-05-09	2010-05-23	2010-06-20	2010-08-21
	2010-05-09	2010-05-23	2010-06-20	2010-08-20
	2010-05-09	2010-05-24	2010-06-20	2010-08-20
	2010-05-09	2010-05-24	2010-06-20	2010-08-21
	2010-05-09	2010-05-23	2010-06-20	2010-08-20
MN0201	2010-05-09	2010-05-23	2010-07-07	2010-09-21
	2010-05-09	2010-05-22	2010-07-07	2010-09-21
	2010-05-09	2010-05-22	2010-07-06	2010-09-20
	2010-05-09	2010-05-22	2010-07-10	2010-09-20
	2010-05-09	2010-05-24	2010-07-12	2010-09-20
	2010-05-09	2010-05-23	2010-07-12	2010-09-20
	2010-05-09	2010-05-23	2010-07-09	2010-09-20
	2010-05-09	2010-05-22	2010-07-10	2010-09-20
	2010-05-09	2010-05-23	2010-07-09	2010-09-21
	2010-05-09	2010-05-22	2010-07-10	2010-09-21
	2010-05-09	2010-05-23	2010-07-09	2010-09-21
	2010-05-09	2010-05-22	2010-07-08	2010-09-20
	2010-05-09	2010-05-23	2010-07-10	2010-09-20
	2010-05-09	2010-05-24	2010-07-12	2010-09-20
	2010-05-09	2010-05-25	2010-07-11	2010-09-20
	2010-05-09	2010-05-22	2010-07-08	2010-09-20
	2010-05-09	2010-05-22	2010-07-06	2010-09-20
	2010-05-09	2010-05-22	2010-07-12	2010-09-21
	2010-05-09	2010-05-23	2010-07-12	2010-09-21
	2010-05-09	2010-05-23	2010-07-12	2010-09-20
	2010-05-09	2010-05-23	2010-07-09	2010-09-20
	2010-05-09	2010-05-23	2010-07-09	2010-09-20
	2010-05-09	2010-05-22	2010-07-12	2010-09-20
	2010-05-09	2010-05-23	2010-07-10	2010-09-19
	2010-05-09	2010-05-23	2010-07-09	2010-09-19
	2010-05-09	2010-05-23	2010-07-06	2010-09-20
	2010-05-09	2010-05-23	2010-07-09	2010-09-21
	2010-05-09	2010-05-23	2010-07-10	2010-09-20
	2010-05-09	2010-05-23	2010-07-10	2010-09-20
	2010-05-09	2010-05-23	2010-07-11	2010-09-20
Traill	2010-05-09	2010-05-23	2010-06-23	2010-09-13
	2010-05-09	2010-05-23	2010-06-23	2010-09-13
	2010-05-09	2010-05-24	2010-06-23	2010-09-14
	2010-05-09	2010-05-23	2010-06-21	2010-09-13
	2010-05-09	2010-05-23	2010-06-23	2010-09-13
	2010-05-09	2010-05-24	2010-06-23	2010-09-14
	2010-05-09	2010-05-24	2010-06-23	2010-09-15
	2010-05-09	2010-05-23	2010-06-23	2010-09-13
	2010-05-09	2010-05-26	2010-06-23	2010-09-13
	2010-05-09	2010-05-25	2010-06-23	2010-09-13
	2010-05-09	2010-05-23	2010-06-22	2010-09-13
	2010-05-09	2010-05-23	2010-06-23	2010-09-13
	2010-05-09	2010-05-23	2010-06-22	2010-09-13
	2010-05-09	2010-05-22	2010-06-22	2010-09-14
	2010-05-09	2010-05-23	2010-06-22	2010-09-14
	2010-05-09	2010-05-24	2010-06-21	2010-09-14
	2010-05-09	2010-05-23	2010-06-21	2010-09-14
	2010-05-09	2010-05-23	2010-06-21	2010-09-14
	2010-05-09	2010-05-23	2010-06-23	2010-09-14
	2010-05-09	2010-05-25	2010-06-23	2010-09-14
	2010-05-09	2010-05-23	2010-06-23	2010-09-15
	2010-05-09	2010-05-24	2010-06-23	2010-09-15
	2010-05-09	2010-05-26	2010-06-23	2010-09-14
	2010-05-09	2010-05-23	2010-06-23	2010-09-14
	2010-05-09	2010-05-23	2010-06-23	2010-09-15
	2010-05-09	2010-05-24	2010-06-22	2010-09-13
	2010-05-09	2010-05-24	2010-06-23	2010-09-13
	2010-05-09	NA	NA	NA
	2010-05-09	NA	NA	NA
	2010-05-09	NA	NA	NA
MN0901	2010-05-09	2010-05-23	2010-07-12	2010-09-26
	2010-05-09	2010-05-24	2010-07-10	2010-09-26
	2010-05-09	2010-05-23	2010-07-12	2010-09-26
	2010-05-09	2010-05-22	2010-07-11	2010-09-25
	2010-05-09	2010-05-23	2010-07-09	2010-09-26
	2010-05-09	2010-05-23	2010-07-09	2010-09-25
	2010-05-09	2010-05-26	2010-07-09	2010-09-26
	2010-05-09	2010-05-25	2010-07-09	2010-09-26
	2010-05-09	2010-05-25	2010-07-14	2010-09-26
	2010-05-09	2010-05-23	2010-07-08	2010-09-25
	2010-05-09	2010-05-23	2010-07-14	2010-09-25
	2010-05-09	2010-05-23	2010-07-09	2010-09-25
	2010-05-09	2010-05-23	2010-07-14	2010-09-26
	2010-05-09	2010-05-23	2010-07-12	2010-09-26
	2010-05-09	2010-05-22	2010-07-10	2010-09-26
	2010-05-09	2010-05-24	2010-07-14	2010-09-25
	2010-05-09	2010-05-23	2010-07-13	2010-09-25
	2010-05-09	2010-05-23	2010-07-13	2010-09-25
	2010-05-09	2010-05-23	2010-07-14	2010-09-25
	2010-05-09	2010-05-26	2010-07-09	2010-09-25
	2010-05-09	2010-05-23	2010-07-09	2010-09-26
	2010-05-09	2010-05-23	2010-07-09	2010-09-25
	2010-05-09	2010-05-24	2010-07-15	2010-09-25
	2010-05-09	2010-05-25	2010-07-13	2010-09-25
	2010-05-09	2010-05-23	2010-07-08	2010-09-25
	2010-05-09	2010-05-24	2010-07-14	2010-09-25
	2010-05-09	2010-05-24	2010-07-13	2010-09-26
	2010-05-09	2010-05-26	2010-07-14	2010-09-26
	2010-05-09	2010-05-23	2010-07-10	2010-09-26
	2010-05-09	2010-05-23	2010-07-11	2010-09-26
Heihe 43	2010-05-09	2010-05-24	2010-06-25	2010-09-12
	2010-05-09	2010-05-23	2010-06-23	2010-09-12
	2010-05-09	2010-05-23	2010-06-25	2010-09-12
	2010-05-09	2010-05-26	2010-06-23	2010-09-12
	2010-05-09	2010-05-24	2010-06-23	2010-09-12
	2010-05-09	2010-05-24	2010-06-23	2010-09-12
	2010-05-09	2010-05-23	2010-06-23	2010-09-12
	2010-05-09	2010-05-23	2010-06-23	2010-09-13
	2010-05-09	2010-05-23	2010-06-23	2010-09-13
	2010-05-09	2010-05-23	2010-06-23	2010-09-14
	2010-05-09	2010-05-23	2010-06-23	2010-09-12
	2010-05-09	2010-05-24	2010-06-23	2010-09-12
	2010-05-09	2010-05-24	2010-06-23	2010-09-12
	2010-05-09	2010-05-24	2010-06-23	2010-09-12
	2010-05-09	2010-05-24	2010-06-24	2010-09-12
	2010-05-09	2010-05-25	2010-06-24	2010-09-12
	2010-05-09	2010-05-23	2010-06-23	2010-09-12
	2010-05-09	2010-05-23	2010-06-23	2010-09-12
	2010-05-09	2010-05-26	2010-06-23	2010-09-12
	2010-05-09	2010-05-24	2010-06-23	2010-09-12
	2010-05-09	2010-05-23	2010-06-23	2010-09-12
	2010-05-09	2010-05-24	2010-06-23	2010-09-12
	2010-05-09	2010-05-23	2010-06-23	2010-09-11
	2010-05-09	2010-05-23	2010-06-23	2010-09-13
	2010-05-09	2010-05-25	2010-06-23	2010-09-13
	2010-05-09	2010-05-25	2010-06-23	2010-09-12
	2010-05-09	2010-05-24	2010-06-23	2010-09-12
	2010-05-09	2010-05-24	2010-06-23	2010-09-12
	2010-05-09	2010-05-25	2010-06-23	2010-09-12
	2010-05-09	2010-05-24	2010-06-24	2010-09-12
Heihe 33	2010-05-09	2010-05-24	2010-06-19	2010-08-30
	2010-05-09	2010-05-25	2010-06-19	2010-08-30
	2010-05-09	2010-05-23	2010-06-19	2010-08-30
	2010-05-09	2010-05-23	2010-06-20	2010-08-29
	2010-05-09	2010-05-23	2010-06-21	2010-08-29
	2010-05-09	2010-05-26	2010-06-19	2010-08-29
	2010-05-09	2010-05-25	2010-06-20	2010-08-30
	2010-05-09	2010-05-23	2010-06-19	2010-08-30
	2010-05-09	2010-05-23	2010-06-19	2010-08-30
	2010-05-09	2010-05-24	2010-06-19	2010-08-30
	2010-05-09	2010-05-23	2010-06-20	2010-08-30
	2010-05-09	2010-05-26	2010-06-19	2010-08-30
	2010-05-09	2010-05-24	2010-06-19	2010-08-30
	2010-05-09	2010-05-25	2010-06-20	2010-08-30
	2010-05-09	2010-05-23	2010-06-19	2010-08-30
	2010-05-09	2010-05-23	2010-06-19	2010-08-30
	2010-05-09	2010-05-25	2010-06-20	2010-08-29
	2010-05-09	2010-05-23	2010-06-19	2010-08-29
	2010-05-09	2010-05-23	2010-06-20	2010-08-29
	2010-05-09	2010-05-24	2010-06-20	2010-08-30
	2010-05-09	2010-05-26	2010-06-19	2010-08-30
	2010-05-09	2010-05-23	2010-06-20	2010-08-30
	2010-05-09	2010-05-23	2010-06-19	2010-08-30
	2010-05-09	2010-05-24	2010-06-20	2010-08-29
	2010-05-09	2010-05-24	2010-06-19	2010-08-30
	2010-05-09	2010-05-25	2010-06-19	2010-08-30
	2010-05-09	2010-05-23	2010-06-20	2010-08-30
	2010-05-09	2010-05-24	2010-06-20	2010-08-30
	2010-05-09	2010-05-23	2010-06-20	2010-08-30
	2010-05-09	2010-05-23	2010-06-19	2010-08-30
Heihe 37	2010-05-09	2010-05-23	2010-06-19	2010-09-04
	2010-05-09	2010-05-23	2010-06-19	2010-09-04
	2010-05-09	2010-05-24	2010-06-19	2010-09-03
	2010-05-09	2010-05-23	2010-06-20	2010-09-04
	2010-05-09	2010-05-25	2010-06-20	2010-09-04
	2010-05-09	2010-05-23	2010-06-19	2010-09-04
	2010-05-09	2010-05-23	2010-06-20	2010-09-04
	2010-05-09	2010-05-23	2010-06-20	2010-09-04
	2010-05-09	2010-05-23	2010-06-20	2010-09-03
	2010-05-09	2010-05-24	2010-06-20	2010-09-03
	2010-05-09	2010-05-24	2010-06-20	2010-09-04
	2010-05-09	2010-05-23	2010-06-20	2010-09-04
	2010-05-09	2010-05-23	2010-06-20	2010-09-03
	2010-05-09	2010-05-24	2010-06-20	2010-09-03
	2010-05-09	2010-05-23	2010-06-20	2010-09-03
	2010-05-09	2010-05-24	2010-06-20	2010-09-03
	2010-05-09	2010-05-24	2010-06-20	2010-09-04
	2010-05-09	2010-05-24	2010-06-19	2010-09-04
	2010-05-09	2010-05-24	2010-06-19	2010-09-04
	2010-05-09	2010-05-23	2010-06-20	2010-09-04
	2010-05-09	2010-05-23	2010-06-19	2010-09-04
	2010-05-09	2010-05-24	2010-06-21	2010-09-04
	2010-05-09	2010-05-24	2010-06-20	2010-09-04
	2010-05-09	2010-05-23	2010-06-20	2010-09-04
	2010-05-09	2010-05-24	2010-06-20	2010-09-03
	2010-05-09	2010-05-24	2010-06-20	2010-09-04
	2010-05-09	2010-05-23	2010-06-20	2010-09-04
	2010-05-09	2010-05-24	2010-06-20	2010-09-04
	2010-05-09	2010-05-24	2010-06-20	2010-09-04
	2010-05-09	2010-05-24	2010-06-19	2010-09-04
Heihe 39	2010-05-09	2010-05-23	2010-06-22	2010-09-06
	2010-05-09	2010-05-23	2010-06-20	2010-09-05
	2010-05-09	2010-05-24	2010-06-22	2010-09-05
	2010-05-09	2010-05-26	2010-06-22	2010-09-05
	2010-05-09	2010-05-22	2010-06-22	2010-09-06
	2010-05-09	2010-05-23	2010-06-20	2010-09-06
	2010-05-09	2010-05-26	2010-06-20	2010-09-06
	2010-05-09	2010-05-25	2010-06-20	2010-09-07
	2010-05-09	2010-05-23	2010-06-20	2010-09-06
	2010-05-09	2010-05-24	2010-06-20	2010-09-06
	2010-05-09	2010-05-23	2010-06-19	2010-09-06
	2010-05-09	2010-05-22	2010-06-20	2010-09-07
	2010-05-09	2010-05-24	2010-06-20	2010-09-06
	2010-05-09	2010-05-23	2010-06-21	2010-09-06
	2010-05-09	2010-05-26	2010-06-22	2010-09-06
	2010-05-09	2010-05-24	2010-06-22	2010-09-06
	2010-05-09	2010-05-23	2010-06-22	2010-09-05
	2010-05-09	2010-05-23	2010-06-21	2010-09-05
	2010-05-09	2010-05-23	2010-06-22	2010-09-06
	2010-05-09	2010-05-23	2010-06-22	2010-09-06
	2010-05-09	2010-05-24	2010-06-20	2010-09-06
	2010-05-09	2010-05-24	2010-06-20	2010-09-07
	2010-05-09	2010-05-24	2010-06-20	2010-09-07
	2010-05-09	NA	NA	NA
	2010-05-09	NA	NA	NA
	2010-05-09	NA	NA	NA
	2010-05-09	NA	NA	NA
	2010-05-09	NA	NA	NA
	2010-05-09	NA	NA	NA
	2010-05-09	NA	NA	NA
Heihe 50	2010-05-09	2010-05-23	2010-06-20	2010-09-06
	2010-05-09	2010-05-22	2010-06-19	2010-09-06
	2010-05-09	2010-05-24	2010-06-21	2010-09-08
	2010-05-09	2010-05-23	2010-06-20	2010-09-08
	2010-05-09	2010-05-24	2010-06-20	2010-09-06
	2010-05-09	2010-05-24	2010-06-20	2010-09-07
	2010-05-09	2010-05-24	2010-06-20	2010-09-07
	2010-05-09	2010-05-24	2010-06-20	2010-09-08
	2010-05-09	2010-05-24	2010-06-20	2010-09-06
	2010-05-09	2010-05-24	2010-06-20	2010-09-06
	2010-05-09	2010-05-24	2010-06-20	2010-09-06
	2010-05-09	2010-05-24	2010-06-20	2010-09-06
	2010-05-09	2010-05-23	2010-06-20	2010-09-06
	2010-05-09	2010-05-25	2010-06-20	2010-09-06
	2010-05-09	2010-05-23	2010-06-20	2010-09-06
	2010-05-09	2010-05-22	2010-06-20	2010-09-08
	2010-05-09	2010-05-23	2010-06-20	2010-09-08
	2010-05-09	2010-05-24	2010-06-20	2010-09-08
	2010-05-09	2010-05-23	2010-06-20	2010-09-08
	2010-05-09	2010-05-24	2010-06-20	2010-09-08
	2010-05-09	2010-05-24	2010-06-20	2010-09-07
	2010-05-09	2010-05-24	2010-06-20	2010-09-07
	2010-05-09	NA	NA	NA
	2010-05-09	NA	NA	NA
	2010-05-09	NA	NA	NA
	2010-05-09	NA	NA	NA
	2010-05-09	NA	NA	NA
	2010-05-09	NA	NA	NA
	2010-05-09	NA	NA	NA
	2010-05-09	NA	NA	NA
Heihe 36	2010-05-09	2010-05-24	2010-06-25	2010-09-16
	2010-05-09	2010-05-23	2010-06-25	2010-09-16
	2010-05-09	2010-05-22	2010-06-24	2010-09-16
	2010-05-09	2010-05-23	2010-06-25	2010-09-15
	2010-05-09	2010-05-25	2010-06-26	2010-09-15
	2010-05-09	2010-05-23	2010-06-24	2010-09-16
	2010-05-09	2010-05-23	2010-06-20	2010-09-16
	2010-05-09	2010-05-23	2010-06-20	2010-09-16
	2010-05-09	2010-05-23	2010-06-20	2010-09-16
	2010-05-09	2010-05-23	2010-06-20	2010-09-16
	2010-05-09	2010-05-24	2010-06-24	2010-09-16
	2010-05-09	2010-05-24	2010-06-24	2010-09-16
	2010-05-09	2010-05-24	2010-06-23	2010-09-15
	2010-05-09	2010-05-22	2010-06-25	2010-09-15
	2010-05-09	2010-05-23	2010-06-24	2010-09-14
	2010-05-09	2010-05-25	2010-06-24	2010-09-16
	2010-05-09	2010-05-23	2010-06-25	2010-09-16
	2010-05-09	2010-05-23	2010-06-24	2010-09-16
	2010-05-09	2010-05-23	2010-06-24	2010-09-16
	2010-05-09	2010-05-23	2010-06-24	2010-09-15
	2010-05-09	2010-05-22	2010-06-24	2010-09-16
	2010-05-09	2010-05-23	2010-06-25	2010-09-16
	2010-05-09	2010-05-23	2010-06-25	2010-09-16
	2010-05-09	2010-05-23	2010-06-25	2010-09-16
	2010-05-09	NA	NA	NA
	2010-05-09	NA	NA	NA
	2010-05-09	NA	NA	NA
	2010-05-09	NA	NA	NA
	2010-05-09	NA	NA	NA
	2010-05-09	NA	NA	NA
Heihe 48	2010-05-09	2010-05-26	2010-06-25	2010-09-13
	2010-05-09	2010-05-23	2010-06-25	2010-09-13
	2010-05-09	2010-05-24	2010-06-25	2010-09-13
	2010-05-09	2010-05-23	2010-06-25	2010-09-14
	2010-05-09	2010-05-24	2010-06-24	2010-09-14
	2010-05-09	2010-05-23	2010-06-25	2010-09-14
	2010-05-09	2010-05-24	2010-06-25	2010-09-14
	2010-05-09	2010-05-24	2010-06-25	2010-09-13
	2010-05-09	2010-05-23	2010-06-24	2010-09-13
	2010-05-09	2010-05-23	2010-06-24	2010-09-13
	2010-05-09	2010-05-24	2010-06-25	2010-09-13
	2010-05-09	2010-05-24	2010-06-25	2010-09-13
	2010-05-09	2010-05-24	2010-06-25	2010-09-13
	2010-05-09	2010-05-26	2010-06-25	2010-09-13
	2010-05-09	2010-05-26	2010-06-25	2010-09-14
	2010-05-09	2010-05-24	2010-06-24	2010-09-14
	2010-05-09	2010-05-24	2010-06-24	2010-09-13
	2010-05-09	2010-05-24	2010-06-24	2010-09-13
	2010-05-09	2010-05-23	2010-06-24	2010-09-14
	2010-05-09	2010-05-24	2010-06-24	2010-09-14
	2010-05-09	2010-05-24	2010-06-24	2010-09-14
	2010-05-09	2010-05-26	2010-06-24	2010-09-13
	2010-05-09	2010-05-24	2010-06-24	2010-09-14
	2010-05-09	2010-05-23	2010-06-26	2010-09-14
	2010-05-09	2010-05-24	2010-06-24	2010-09-14
	2010-05-09	2010-05-23	2010-06-24	2010-09-13
	2010-05-09	2010-05-24	2010-06-24	2010-09-14
	2010-05-09	2010-05-24	2010-06-24	2010-09-14
	2010-05-09	2010-05-24	2010-06-24	2010-09-13
	2010-05-09	2010-05-25	2010-06-24	2010-09-14
Heihe 38	2010-05-09	2010-05-24	2010-06-24	2010-09-16
	2010-05-09	2010-05-23	2010-06-24	2010-09-16
	2010-05-09	2010-05-23	2010-06-24	2010-09-16
	2010-05-09	2010-05-24	2010-06-24	2010-09-17
	2010-05-09	2010-05-23	2010-06-25	2010-09-17
	2010-05-09	2010-05-26	2010-06-24	2010-09-16
	2010-05-09	2010-05-26	2010-06-25	2010-09-16
	2010-05-09	2010-05-25	2010-06-25	2010-09-16
	2010-05-09	2010-05-24	2010-06-25	2010-09-16
	2010-05-09	2010-05-24	2010-06-25	2010-09-16
	2010-05-09	2010-05-23	2010-06-25	2010-09-16
	2010-05-09	2010-05-23	2010-06-23	2010-09-16
	2010-05-09	2010-05-24	2010-06-24	2010-09-16
	2010-05-09	2010-05-25	2010-06-24	2010-09-16
	2010-05-09	2010-05-25	2010-06-24	2010-09-17
	2010-05-09	2010-05-24	2010-06-24	2010-09-17
	2010-05-09	2010-05-23	2010-06-24	2010-09-18
	2010-05-09	2010-05-23	2010-06-24	2010-09-18
	2010-05-09	2010-05-25	2010-06-24	2010-09-16
	2010-05-09	2010-05-23	2010-06-25	2010-09-16
	2010-05-09	2010-05-24	2010-06-24	2010-09-16
	2010-05-09	2010-05-24	2010-06-25	2010-09-17
	2010-05-09	2010-05-25	2010-06-26	2010-09-16
	2010-05-09	2010-05-24	2010-06-24	2010-09-16
	2010-05-09	2010-05-24	2010-06-25	2010-09-16
	2010-05-09	2010-05-24	2010-06-24	2010-09-16
	2010-05-09	2010-05-24	2010-06-23	2010-09-18
	2010-05-09	2010-05-23	2010-06-23	2010-09-16
	2010-05-09	2010-05-25	2010-06-24	2010-09-16
	2010-05-09	2010-05-25	2010-06-24	2010-09-16
Heihe 46	2010-05-09	2010-05-23	2010-06-25	2010-09-10
	2010-05-09	2010-05-25	2010-06-25	2010-09-10
	2010-05-09	2010-05-25	2010-06-24	2010-09-10
	2010-05-09	2010-05-24	2010-06-25	2010-09-10
	2010-05-09	2010-05-23	2010-06-23	2010-09-12
	2010-05-09	2010-05-23	2010-06-23	2010-09-12
	2010-05-09	2010-05-24	2010-06-24	2010-09-10
	2010-05-09	2010-05-24	2010-06-25	2010-09-10
	2010-05-09	2010-05-25	2010-06-24	2010-09-10
	2010-05-09	2010-05-25	2010-06-24	2010-09-11
	2010-05-09	2010-05-23	2010-06-24	2010-09-11
	2010-05-09	2010-05-23	2010-06-24	2010-09-10
	2010-05-09	2010-05-24	2010-06-23	2010-09-10
	2010-05-09	2010-05-24	2010-06-25	2010-09-10
	2010-05-09	2010-05-25	2010-06-25	2010-09-11
	2010-05-09	2010-05-25	2010-06-25	2010-09-11
	2010-05-09	2010-05-25	2010-06-24	2010-09-11
	2010-05-09	2010-05-24	2010-06-25	2010-09-11
	2010-05-09	2010-05-25	2010-06-25	2010-09-10
	2010-05-09	2010-05-25	2010-06-24	2010-09-10
	2010-05-09	2010-05-25	2010-06-24	2010-09-10
	2010-05-09	2010-05-24	2010-06-24	2010-09-10
	2010-05-09	2010-05-23	2010-06-24	2010-09-10
	2010-05-09	2010-05-24	2010-06-24	2010-09-10
	2010-05-09	2010-05-23	2010-06-24	2010-09-10
	2010-05-09	2010-05-24	2010-06-24	2010-09-10
	2010-05-09	NA	NA	NA
	2010-05-09	NA	NA	NA
	2010-05-09	NA	NA	NA
	2010-05-09	NA	NA	NA
Heihe 51	2010-05-09	2010-05-24	2010-06-23	2010-09-06
	2010-05-09	2010-05-23	2010-06-23	2010-09-06
	2010-05-09	2010-05-23	2010-06-24	2010-09-06
	2010-05-09	2010-05-23	2010-06-23	2010-09-06
	2010-05-09	2010-05-23	2010-06-25	2010-09-06
	2010-05-09	2010-05-23	2010-06-23	2010-09-06
	2010-05-09	2010-05-23	2010-06-25	2010-09-06
	2010-05-09	2010-05-25	2010-06-25	2010-09-06
	2010-05-09	2010-05-23	2010-06-24	2010-09-06
	2010-05-09	2010-05-23	2010-06-25	2010-09-06
	2010-05-09	2010-05-23	2010-06-24	2010-09-06
	2010-05-09	2010-05-24	2010-06-24	2010-09-06
	2010-05-09	2010-05-24	2010-06-24	2010-09-06
	2010-05-09	2010-05-25	2010-06-24	2010-09-06
	2010-05-09	2010-05-24	2010-06-24	2010-09-06
	2010-05-09	2010-05-23	2010-06-23	2010-09-06
	2010-05-09	2010-05-23	2010-06-23	2010-09-06
	2010-05-09	2010-05-23	2010-06-24	2010-09-06
	2010-05-09	2010-05-23	2010-06-25	2010-09-06
	2010-05-09	2010-05-23	2010-06-24	2010-09-08
	2010-05-09	2010-05-23	2010-06-24	2010-09-07
	2010-05-09	2010-05-23	2010-06-24	2010-09-07
	2010-05-09	2010-05-25	2010-06-24	2010-09-06
	2010-05-09	2010-05-23	2010-06-24	2010-09-06
	2010-05-09	2010-05-23	2010-06-24	2010-09-06
	2010-05-09	2010-05-23	2010-06-24	2010-09-06
	2010-05-09	2010-05-24	2010-06-25	2010-09-06
	2010-05-09	2010-05-24	2010-06-24	2010-09-06
	2010-05-09	2010-05-24	2010-06-24	2010-09-06
	2010-05-09	2010-05-24	2010-06-24	2010-09-06
Beidou 19	2010-05-09	2010-05-24	2010-06-23	2010-09-13
	2010-05-09	2010-05-25	2010-06-23	2010-09-12
	2010-05-09	2010-05-24	2010-06-23	2010-09-12
	2010-05-09	2010-05-24	2010-06-23	2010-09-12
	2010-05-09	2010-05-23	2010-06-23	2010-09-12
	2010-05-09	2010-05-24	2010-06-23	2010-09-12
	2010-05-09	2010-05-24	2010-06-23	2010-09-12
	2010-05-09	2010-05-24	2010-06-23	2010-09-12
	2010-05-09	2010-05-23	2010-06-23	2010-09-12
	2010-05-09	2010-05-24	2010-06-23	2010-09-12
	2010-05-09	2010-05-24	2010-06-25	2010-09-12
	2010-05-09	2010-05-23	2010-06-24	2010-09-12
	2010-05-09	2010-05-23	2010-06-24	2010-09-12
	2010-05-09	2010-05-24	2010-06-25	2010-09-12
	2010-05-09	2010-05-24	2010-06-24	2010-09-13
	2010-05-09	2010-05-24	2010-06-23	2010-09-13
	2010-05-09	2010-05-23	2010-06-23	2010-09-13
	2010-05-09	2010-05-23	2010-06-23	2010-09-12
	2010-05-09	2010-05-23	2010-06-23	2010-09-12
	2010-05-09	2010-05-25	2010-06-23	2010-09-12
	2010-05-09	2010-05-23	2010-06-23	2010-09-12
	2010-05-09	2010-05-24	2010-06-23	2010-09-13
	2010-05-09	2010-05-24	2010-06-23	2010-09-13
	2010-05-09	2010-05-23	2010-06-23	2010-09-13
	2010-05-09	2010-05-24	2010-06-23	2010-09-12
	2010-05-09	2010-05-24	2010-06-23	2010-09-12
	2010-05-09	2010-05-23	2010-06-25	2010-09-12
	2010-05-09	2010-05-23	2010-06-25	2010-09-12
	2010-05-09	2010-05-25	2010-06-25	2010-09-12
	2010-05-09	2010-05-24	2010-06-24	2010-09-12
Jiufeng 10	2010-05-09	2010-05-24	2010-06-22	2010-09-07
	2010-05-09	2010-05-24	2010-06-22	2010-09-07
	2010-05-09	2010-05-23	2010-06-22	2010-09-07
	2010-05-09	2010-05-26	2010-06-23	2010-09-08
	2010-05-09	2010-05-24	2010-06-22	2010-09-08
	2010-05-09	2010-05-24	2010-06-23	2010-09-08
	2010-05-09	2010-05-25	2010-06-22	2010-09-08
	2010-05-09	2010-05-24	2010-06-22	2010-09-08
	2010-05-09	2010-05-25	2010-06-23	2010-09-08
	2010-05-09	2010-05-24	2010-06-24	2010-09-08
	2010-05-09	2010-05-23	2010-06-23	2010-09-06
	2010-05-09	2010-05-24	2010-06-24	2010-09-07
	2010-05-09	2010-05-24	2010-06-25	2010-09-07
	2010-05-09	2010-05-25	2010-06-24	2010-09-08
	2010-05-09	2010-05-24	2010-06-25	2010-09-08
	2010-05-09	2010-05-24	2010-06-23	2010-09-08
	2010-05-09	2010-05-24	2010-06-22	2010-09-08
	2010-05-09	2010-05-23	2010-06-22	2010-09-08
	2010-05-09	2010-05-24	2010-06-23	2010-09-08
	2010-05-09	2010-05-24	2010-06-22	2010-09-08
	2010-05-09	2010-05-25	2010-06-22	2010-09-08
	2010-05-09	2010-05-24	2010-06-23	2010-09-08
	2010-05-09	2010-05-24	2010-06-22	2010-09-06
	2010-05-09	2010-05-25	2010-06-23	2010-09-06
	2010-05-09	2010-05-23	2010-06-25	2010-09-08
	2010-05-09	2010-05-23	2010-06-24	2010-09-08
	2010-05-09	2010-05-23	2010-06-25	2010-09-08
	2010-05-09	2010-05-24	2010-06-25	2010-09-08
	2010-05-09	2010-05-24	2010-06-25	2010-09-08
	2010-05-09	2010-05-24	2010-06-25	2010-09-08
Jiufeng 7	2010-05-09	2010-05-24	2010-06-20	2010-09-09
	2010-05-09	2010-05-23	2010-06-19	2010-09-09
	2010-05-09	2010-05-24	2010-06-19	2010-09-09
	2010-05-09	2010-05-25	2010-06-20	2010-09-08
	2010-05-09	2010-05-26	2010-06-20	2010-09-08
	2010-05-09	2010-05-24	2010-06-20	2010-09-08
	2010-05-09	2010-05-23	2010-06-19	2010-09-08
	2010-05-09	2010-05-23	2010-06-19	2010-09-08
	2010-05-09	2010-05-23	2010-06-19	2010-09-08
	2010-05-09	2010-05-23	2010-06-20	2010-09-08
	2010-05-09	2010-05-24	2010-06-20	2010-09-08
	2010-05-09	2010-05-24	2010-06-20	2010-09-08
	2010-05-09	2010-05-24	2010-06-20	2010-09-09
	2010-05-09	2010-05-25	2010-06-20	2010-09-09
	2010-05-09	2010-05-23	2010-06-20	2010-09-09
	2010-05-09	2010-05-24	2010-06-20	2010-09-09
	2010-05-09	2010-05-23	2010-06-20	2010-09-09
	2010-05-09	2010-05-24	2010-06-20	2010-09-09
	2010-05-09	2010-05-26	2010-06-20	2010-09-09
	2010-05-09	2010-05-25	2010-06-20	2010-09-09
	2010-05-09	2010-05-24	2010-06-20	2010-09-08
	2010-05-09	2010-05-24	2010-06-20	2010-09-08
	2010-05-09	2010-05-23	2010-06-19	2010-09-08
	2010-05-09	2010-05-23	2010-06-20	2010-09-08
	2010-05-09	2010-05-23	2010-06-20	2010-09-09
	2010-05-09	2010-05-24	2010-06-20	2010-09-09
	2010-05-09	2010-05-25	2010-06-19	2010-09-09
	2010-05-09	2010-05-24	2010-06-19	2010-09-08
	2010-05-09	2010-05-26	2010-06-19	2010-09-08
	2010-05-09	2010-05-24	2010-06-20	2010-09-09
Jiufeng 9	2010-05-09	2010-05-23	2010-06-24	2010-09-13
	2010-05-09	2010-05-23	2010-06-25	2010-09-13
	2010-05-09	2010-05-24	2010-06-24	2010-09-12
	2010-05-09	2010-05-25	2010-06-25	2010-09-12
	2010-05-09	2010-05-25	2010-06-25	2010-09-13
	2010-05-09	2010-05-26	2010-06-24	2010-09-13
	2010-05-09	2010-05-23	2010-06-24	2010-09-13
	2010-05-09	2010-05-24	2010-06-23	2010-09-12
	2010-05-09	2010-05-25	2010-06-23	2010-09-12
	2010-05-09	2010-05-24	2010-06-25	2010-09-13
	2010-05-09	2010-05-25	2010-06-21	2010-09-13
	2010-05-09	2010-05-25	2010-06-22	2010-09-13
	2010-05-09	2010-05-25	2010-06-23	2010-09-13
	2010-05-09	2010-05-22	2010-06-24	2010-09-13
	2010-05-09	2010-05-23	2010-06-25	2010-09-13
	2010-05-09	2010-05-24	2010-06-24	2010-09-13
	2010-05-09	2010-05-25	2010-06-25	2010-09-13
	2010-05-09	2010-05-25	2010-06-25	2010-09-13
	2010-05-09	2010-05-25	2010-06-24	2010-09-12
	2010-05-09	2010-05-24	2010-06-24	2010-09-12
	2010-05-09	2010-05-25	2010-06-23	2010-09-12
	2010-05-09	2010-05-24	2010-06-23	2010-09-13
	2010-05-09	2010-05-24	2010-06-24	2010-09-13
	2010-05-09	2010-05-24	2010-06-21	2010-09-13
	2010-05-09	2010-05-24	2010-06-22	2010-09-13
	2010-05-09	NA	NA	NA
	2010-05-09	NA	NA	NA
	2010-05-09	NA	NA	NA
	2010-05-09	NA	NA	NA
	2010-05-09	NA	NA	NA
Beidou 16	2010-05-09	2010-05-23	2010-06-24	2010-09-02
	2010-05-09	2010-05-23	2010-06-24	2010-09-02
	2010-05-09	2010-05-23	2010-06-24	2010-09-03
	2010-05-09	2010-05-25	2010-06-24	2010-09-03
	2010-05-09	2010-05-25	2010-06-24	2010-09-03
	2010-05-09	2010-05-26	2010-06-24	2010-09-02
	2010-05-09	2010-05-25	2010-06-24	2010-09-02
	2010-05-09	2010-05-25	2010-06-24	2010-09-02
	2010-05-09	2010-05-26	2010-06-24	2010-09-02
	2010-05-09	2010-05-25	2010-06-24	2010-09-02
	2010-05-09	2010-05-24	2010-06-23	2010-09-02
	2010-05-09	2010-05-24	2010-06-23	2010-09-02
	2010-05-09	2010-05-24	2010-06-24	2010-09-02
	2010-05-09	2010-05-25	2010-06-25	2010-09-02
	2010-05-09	2010-05-22	2010-06-24	2010-09-02
	2010-05-09	2010-05-23	2010-06-24	2010-09-03
	2010-05-09	2010-05-24	2010-06-24	2010-09-03
	2010-05-09	2010-05-26	2010-06-24	2010-09-03
	2010-05-09	2010-05-25	2010-06-24	2010-09-02
	2010-05-09	2010-05-24	2010-06-24	2010-09-02
	2010-05-09	2010-05-25	2010-06-25	2010-09-02
	2010-05-09	2010-05-24	2010-06-25	2010-09-02
	2010-05-09	2010-05-24	2010-06-25	2010-09-02
	2010-05-09	2010-05-24	2010-06-23	2010-09-02
	2010-05-09	2010-05-24	2010-06-24	2010-09-03
	2010-05-09	2010-05-24	2010-06-23	2010-09-03
	2010-05-09	2010-05-24	2010-06-25	2010-09-02
	2010-05-09	2010-05-25	2010-06-23	2010-09-02
	2010-05-09	NA	NA	NA
	2010-05-09	NA	NA	NA
Beidou 24	2010-05-09	2010-05-25	2010-06-23	2010-08-30
	2010-05-09	2010-05-24	2010-06-22	2010-08-30
	2010-05-09	2010-05-23	2010-06-23	2010-08-31
	2010-05-09	2010-05-24	2010-06-23	2010-08-31
	2010-05-09	2010-05-23	2010-06-23	2010-08-31
	2010-05-09	2010-05-24	2010-06-22	2010-08-30
	2010-05-09	2010-05-23	2010-06-22	2010-08-30
	2010-05-09	2010-05-24	2010-06-22	2010-08-30
	2010-05-09	2010-05-23	2010-06-23	2010-08-30
	2010-05-09	2010-05-24	2010-06-23	2010-08-30
	2010-05-09	2010-05-23	2010-06-23	2010-08-30
	2010-05-09	2010-05-24	2010-06-23	2010-08-31
	2010-05-09	2010-05-23	2010-06-23	2010-08-31
	2010-05-09	2010-05-25	2010-06-22	2010-08-30
	2010-05-09	2010-05-25	2010-06-23	2010-08-30
	2010-05-09	2010-05-24	2010-06-23	2010-08-30
	2010-05-09	2010-05-26	2010-06-23	2010-08-31
	2010-05-09	2010-05-23	2010-06-22	2010-08-29
	2010-05-09	2010-05-24	2010-06-22	2010-08-29
	2010-05-09	2010-05-25	2010-06-22	2010-08-29
	2010-05-09	2010-05-24	2010-06-23	2010-08-30
	2010-05-09	2010-05-24	2010-06-22	2010-08-30
	2010-05-09	2010-05-25	2010-06-23	2010-08-30
	2010-05-09	2010-05-23	2010-06-23	2010-08-30
	2010-05-09	2010-05-23	2010-06-23	2010-08-30
	2010-05-09	NA	NA	NA
	2010-05-09	NA	NA	NA
	2010-05-09	NA	NA	NA
	2010-05-09	NA	NA	NA
	2010-05-09	NA	NA	NA
Fengshou 15	2010-05-09	2010-05-24	2010-06-26	2010-09-13
	2010-05-09	2010-05-24	2010-06-25	2010-09-13
	2010-05-09	2010-05-26	2010-06-25	2010-09-12
	2010-05-09	2010-05-24	2010-06-25	2010-09-12
	2010-05-09	2010-05-24	2010-06-25	2010-09-12
	2010-05-09	2010-05-24	2010-06-25	2010-09-12
	2010-05-09	2010-05-24	2010-06-25	2010-09-13
	2010-05-09	2010-05-24	2010-06-25	2010-09-13
	2010-05-09	2010-05-24	2010-06-25	2010-09-13
	2010-05-09	2010-05-25	2010-06-24	2010-09-13
	2010-05-09	2010-05-23	2010-06-25	2010-09-12
	2010-05-09	2010-05-26	2010-06-25	2010-09-12
	2010-05-09	2010-05-24	2010-06-25	2010-09-12
	2010-05-09	2010-05-23	2010-06-25	2010-09-13
	2010-05-09	2010-05-24	2010-06-26	2010-09-13
	2010-05-09	2010-05-24	2010-06-25	2010-09-13
	2010-05-09	2010-05-26	2010-06-25	2010-09-13
	2010-05-09	2010-05-24	2010-06-25	2010-09-13
	2010-05-09	2010-05-24	2010-06-24	2010-09-13
	2010-05-09	2010-05-24	2010-06-24	2010-09-13
	2010-05-09	2010-05-24	2010-06-25	2010-09-13
	2010-05-09	2010-05-24	2010-06-25	2010-09-13
	2010-05-09	2010-05-25	2010-06-24	2010-09-12
	2010-05-09	2010-05-23	2010-06-25	2010-09-12
	2010-05-09	2010-05-26	2010-06-25	2010-09-12
	2010-05-09	2010-05-27	2010-06-25	2010-09-13
	2010-05-09	2010-05-23	2010-06-25	2010-09-13
	2010-05-09	2010-05-23	2010-06-25	2010-09-13
	2010-05-09	NA	NA	NA
	2010-05-09	NA	NA	NA
Fengshou 24	2010-05-09	2010-05-24	2010-06-25	2010-09-12
	2010-05-09	2010-05-26	2010-06-25	2010-09-12
	2010-05-09	2010-05-26	2010-06-25	2010-09-12
	2010-05-09	2010-05-27	2010-06-24	2010-09-13
	2010-05-09	2010-05-23	2010-06-25	2010-09-13
	2010-05-09	2010-05-23	2010-06-25	2010-09-13
	2010-05-09	2010-05-23	2010-06-25	2010-09-13
	2010-05-09	2010-05-23	2010-06-24	2010-09-13
	2010-05-09	2010-05-23	2010-06-25	2010-09-13
	2010-05-09	2010-05-23	2010-06-25	2010-09-13
	2010-05-09	2010-05-26	2010-06-25	2010-09-13
	2010-05-09	2010-05-26	2010-06-25	2010-09-13
	2010-05-09	2010-05-26	2010-06-25	2010-09-13
	2010-05-09	2010-05-23	2010-06-25	2010-09-13
	2010-05-09	2010-05-26	2010-06-24	2010-09-13
	2010-05-09	2010-05-24	2010-06-25	2010-09-13
	2010-05-09	2010-05-23	2010-06-25	2010-09-12
	2010-05-09	2010-05-27	2010-06-25	2010-09-12
	2010-05-09	2010-05-23	2010-06-25	2010-09-12
	2010-05-09	2010-05-24	2010-06-25	2010-09-13
	2010-05-09	2010-05-24	2010-06-24	2010-09-13
	2010-05-09	2010-05-24	2010-06-25	2010-09-13
	2010-05-09	2010-05-25	2010-06-25	2010-09-12
	2010-05-09	2010-05-23	2010-06-25	2010-09-12
	2010-05-09	2010-05-27	2010-06-25	2010-09-12
	2010-05-09	2010-05-23	2010-06-24	2010-09-13
	2010-05-09	2010-05-27	2010-06-25	2010-09-13
	2010-05-09	2010-05-27	2010-06-25	2010-09-13
	2010-05-09	2010-05-23	2010-06-25	2010-09-13
	2010-05-09	2010-05-23	2010-06-25	2010-09-13
Fengshou 27	2010-05-09	2010-05-24	2010-07-05	2010-09-12
	2010-05-09	2010-05-24	2010-07-04	2010-09-13
	2010-05-09	2010-05-27	2010-07-04	2010-09-13
	2010-05-09	2010-05-27	2010-07-03	2010-09-13
	2010-05-09	2010-05-27	2010-07-03	2010-09-13
	2010-05-09	2010-05-26	2010-07-04	2010-09-12
	2010-05-09	2010-05-24	2010-07-05	2010-09-12
	2010-05-09	2010-05-23	2010-07-04	2010-09-12
	2010-05-09	2010-05-24	2010-07-04	2010-09-13
	2010-05-09	2010-05-26	2010-07-05	2010-09-13
	2010-05-09	2010-05-23	2010-07-05	2010-09-13
	2010-05-09	2010-05-24	2010-07-04	2010-09-13
	2010-05-09	2010-05-24	2010-07-05	2010-09-12
	2010-05-09	2010-05-23	2010-07-05	2010-09-12
	2010-05-09	2010-05-24	2010-07-05	2010-09-12
	2010-05-09	2010-05-23	2010-07-05	2010-09-12
	2010-05-09	2010-05-24	2010-07-04	2010-09-12
	2010-05-09	2010-05-26	2010-07-05	2010-09-12
	2010-05-09	2010-05-26	2010-07-04	2010-09-12
	2010-05-09	2010-05-26	2010-07-05	2010-09-13
	2010-05-09	2010-05-27	2010-07-04	2010-09-13
	2010-05-09	2010-05-24	2010-07-05	2010-09-13
	2010-05-09	2010-05-23	2010-07-04	2010-09-13
	2010-05-09	2010-05-24	2010-07-04	2010-09-13
	2010-05-09	2010-05-24	2010-07-04	2010-09-13
	2010-05-09	2010-05-26	2010-07-05	2010-09-13
	2010-05-09	2010-05-24	2010-07-05	2010-09-12
	2010-05-09	2010-05-24	2010-07-05	2010-09-12
	2010-05-09	2010-05-23	2010-07-05	2010-09-13
	2010-05-09	2010-05-24	2010-07-05	2010-09-13
Fengshou 23	2010-05-09	2010-05-23	2010-06-24	2010-09-02
	2010-05-09	2010-05-23	2010-06-24	2010-09-03
	2010-05-09	2010-05-23	2010-06-24	2010-09-04
	2010-05-09	2010-05-24	2010-06-24	2010-09-04
	2010-05-09	2010-05-24	2010-06-25	2010-09-02
	2010-05-09	2010-05-23	2010-06-23	2010-09-02
	2010-05-09	2010-05-24	2010-06-23	2010-09-02
	2010-05-09	2010-05-23	2010-06-24	2010-09-02
	2010-05-09	2010-05-24	2010-06-24	2010-09-03
	2010-05-09	2010-05-23	2010-06-25	2010-09-03
	2010-05-09	2010-05-23	2010-06-23	2010-09-03
	2010-05-09	2010-05-23	2010-06-23	2010-09-03
	2010-05-09	2010-05-24	2010-06-24	2010-09-02
	2010-05-09	2010-05-24	2010-06-24	2010-09-04
	2010-05-09	2010-05-24	2010-06-25	2010-09-04
	2010-05-09	2010-05-24	2010-06-23	2010-09-02
	2010-05-09	2010-05-24	2010-06-23	2010-09-03
	2010-05-09	2010-05-24	2010-06-25	2010-09-03
	2010-05-09	2010-05-24	2010-06-23	2010-09-02
	2010-05-09	2010-05-23	2010-06-25	2010-09-02
	2010-05-09	2010-05-24	2010-06-23	2010-09-04
	2010-05-09	2010-05-24	2010-06-24	2010-09-04
	2010-05-09	2010-05-23	2010-06-25	2010-09-02
	2010-05-09	2010-05-23	2010-06-25	2010-09-02
	2010-05-09	2010-05-23	2010-06-24	2010-09-02
	2010-05-09	2010-05-24	2010-06-24	2010-09-03
	2010-05-09	2010-05-23	2010-06-24	2010-09-03
	2010-05-09	2010-05-24	2010-06-24	2010-09-02
	2010-05-09	2010-05-22	2010-06-25	2010-09-02
	2010-05-09	2010-05-24	2010-06-24	2010-09-02
Fengshou 26	2010-05-09	2010-05-24	2010-06-23	2010-09-12
	2010-05-09	2010-05-24	2010-06-24	2010-09-13
	2010-05-09	2010-05-27	2010-06-23	2010-09-13
	2010-05-09	2010-05-24	2010-06-24	2010-09-13
	2010-05-09	2010-05-26	2010-06-25	2010-09-12
	2010-05-09	2010-05-26	2010-06-24	2010-09-12
	2010-05-09	2010-05-24	2010-06-25	2010-09-12
	2010-05-09	2010-05-24	2010-06-25	2010-09-12
	2010-05-09	2010-05-24	2010-06-25	2010-09-13
	2010-05-09	2010-05-24	2010-06-23	2010-09-12
	2010-05-09	2010-05-24	2010-06-24	2010-09-12
	2010-05-09	2010-05-26	2010-06-25	2010-09-12
	2010-05-09	2010-05-24	2010-06-24	2010-09-12
	2010-05-09	2010-05-23	2010-06-24	2010-09-13
	2010-05-09	2010-05-25	2010-06-25	2010-09-12
	2010-05-09	2010-05-23	2010-06-23	2010-09-12
	2010-05-09	2010-05-26	2010-06-23	2010-09-13
	2010-05-09	2010-05-26	2010-06-24	2010-09-13
	2010-05-09	2010-05-24	2010-06-25	2010-09-12
	2010-05-09	2010-05-24	2010-06-23	2010-09-12
	2010-05-09	2010-05-23	2010-06-23	2010-09-13
	2010-05-09	2010-05-24	2010-06-24	2010-09-12
	2010-05-09	2010-05-24	2010-06-24	2010-09-13
	2010-05-09	2010-05-24	2010-06-23	2010-09-13
	2010-05-09	2010-05-27	2010-06-25	2010-09-13
	2010-05-09	2010-05-26	2010-06-25	2010-09-12
	2010-05-09	2010-05-24	2010-06-24	2010-09-12
	2010-05-09	NA	NA	NA
	2010-05-09	NA	NA	NA
	2010-05-09	NA	NA	NA
Mengdou 11	2010-05-09	2010-05-25	2010-06-24	2010-09-04
	2010-05-09	2010-05-23	2010-06-24	2010-09-04
	2010-05-09	2010-05-23	2010-06-23	2010-09-05
	2010-05-09	2010-05-23	2010-06-23	2010-09-05
	2010-05-09	2010-05-24	2010-06-25	2010-09-04
	2010-05-09	2010-05-24	2010-06-24	2010-09-04
	2010-05-09	2010-05-24	2010-06-24	2010-09-04
	2010-05-09	2010-05-24	2010-06-23	2010-09-04
	2010-05-09	2010-05-24	2010-06-24	2010-09-05
	2010-05-09	2010-05-24	2010-06-24	2010-09-05
	2010-05-09	2010-05-24	2010-06-24	2010-09-05
	2010-05-09	2010-05-24	2010-06-24	2010-09-05
	2010-05-09	2010-05-23	2010-06-24	2010-09-04
	2010-05-09	2010-05-23	2010-06-24	2010-09-04
	2010-05-09	2010-05-24	2010-06-23	2010-09-04
	2010-05-09	2010-05-25	2010-06-23	2010-09-04
	2010-05-09	2010-05-24	2010-06-23	2010-09-04
	2010-05-09	2010-05-24	2010-06-25	2010-09-05
	2010-05-09	2010-05-24	2010-06-23	2010-09-05
	2010-05-09	2010-05-24	2010-06-24	2010-09-05
	2010-05-09	2010-05-23	2010-06-23	2010-09-04
	2010-05-09	2010-05-24	2010-06-23	2010-09-04
	2010-05-09	2010-05-25	2010-06-23	2010-09-04
	2010-05-09	2010-05-25	2010-06-24	2010-09-04
	2010-05-09	2010-05-24	2010-06-23	2010-09-04
	2010-05-09	2010-05-23	2010-06-25	2010-09-05
	2010-05-09	2010-05-23	2010-06-25	2010-09-05
	2010-05-09	2010-05-23	2010-06-25	2010-09-04
	2010-05-09	2010-05-23	2010-06-25	2010-09-04
	2010-05-09	2010-05-23	2010-06-24	2010-09-04
Mengdou 9	2010-05-09	2010-05-25	2010-06-25	2010-09-08
	2010-05-09	2010-05-25	2010-06-24	2010-09-08
	2010-05-09	2010-05-24	2010-06-23	2010-09-08
	2010-05-09	2010-05-24	2010-06-23	2010-09-08
	2010-05-09	2010-05-26	2010-06-25	2010-09-07
	2010-05-09	2010-05-24	2010-06-23	2010-09-07
	2010-05-09	2010-05-23	2010-06-23	2010-09-07
	2010-05-09	2010-05-24	2010-06-24	2010-09-08
	2010-05-09	2010-05-25	2010-06-24	2010-09-08
	2010-05-09	2010-05-25	2010-06-24	2010-09-08
	2010-05-09	2010-05-25	2010-06-24	2010-09-08
	2010-05-09	2010-05-24	2010-06-23	2010-09-08
	2010-05-09	2010-05-25	2010-06-24	2010-09-08
	2010-05-09	2010-05-24	2010-06-23	2010-09-07
	2010-05-09	2010-05-25	2010-06-24	2010-09-07
	2010-05-09	2010-05-25	2010-06-24	2010-09-08
	2010-05-09	2010-05-25	2010-06-23	2010-09-08
	2010-05-09	2010-05-24	2010-06-23	2010-09-08
	2010-05-09	2010-05-24	2010-06-23	2010-09-08
	2010-05-09	2010-05-26	2010-06-25	2010-09-08
	2010-05-09	2010-05-24	2010-06-24	2010-09-08
	2010-05-09	2010-05-23	2010-06-23	2010-09-08
	2010-05-09	2010-05-25	2010-06-24	2010-09-07
	2010-05-09	2010-05-25	2010-06-24	2010-09-07
	2010-05-09	2010-05-25	2010-06-25	2010-09-08
	2010-05-09	2010-05-25	2010-06-23	2010-09-07
	2010-05-09	2010-05-24	2010-06-23	2010-09-07
	2010-05-09	2010-05-25	2010-06-24	2010-09-08
	2010-05-09	2010-05-25	2010-06-23	2010-09-08
	2010-05-09	2010-05-24	2010-06-25	2010-09-08
Hujiao 07-2479	2010-05-09	2010-05-24	2010-06-19	2010-08-10
	2010-05-09	2010-05-24	2010-06-19	2010-08-10
	2010-05-09	2010-05-25	2010-06-19	2010-08-12
	2010-05-09	2010-05-24	2010-06-20	2010-08-10
	2010-05-09	2010-05-24	2010-06-19	2010-08-10
	2010-05-09	2010-05-24	2010-06-19	2010-08-12
	2010-05-09	2010-05-24	2010-06-19	2010-08-12
	2010-05-09	2010-05-26	2010-06-19	2010-08-12
	2010-05-09	2010-05-23	2010-06-19	2010-08-10
	2010-05-09	2010-05-24	2010-06-19	2010-08-12
	2010-05-09	2010-05-25	2010-06-19	2010-08-12
	2010-05-09	2010-05-23	2010-06-19	2010-08-10
	2010-05-09	2010-05-24	2010-06-19	2010-08-12
	2010-05-09	2010-05-24	2010-06-19	2010-08-12
	2010-05-09	2010-05-25	2010-06-19	2010-08-10
	2010-05-09	2010-05-24	2010-06-19	2010-08-10
	2010-05-09	2010-05-24	2010-06-19	2010-08-10
	2010-05-09	2010-05-24	2010-06-19	2010-08-12
	2010-05-09	2010-05-25	2010-06-19	2010-08-12
	2010-05-09	2010-05-24	2010-06-19	2010-08-12
	2010-05-09	2010-05-24	2010-06-19	2010-08-10
	2010-05-09	2010-05-24	2010-06-19	2010-08-10
	2010-05-09	2010-05-24	2010-06-19	2010-08-10
	2010-05-09	2010-05-24	2010-06-20	2010-08-12
	2010-05-09	2010-05-24	2010-06-20	2010-08-12
	2010-05-09	2010-05-24	2010-06-19	2010-08-12
	2010-05-09	2010-05-24	2010-06-19	2010-08-10
	2010-05-09	2010-05-24	2010-06-19	2010-08-12
	2010-05-09	2010-05-24	2010-06-19	2010-08-12
	2010-05-09	2010-05-24	2010-06-19	2010-08-10
Mengdou 7	2010-05-09	2010-05-25	2010-06-22	2010-08-31
	2010-05-09	2010-05-24	2010-06-22	2010-08-31
	2010-05-09	2010-05-24	2010-06-22	2010-08-30
	2010-05-09	2010-05-25	2010-06-22	2010-08-30
	2010-05-09	2010-05-24	2010-06-22	2010-08-30
	2010-05-09	2010-05-26	2010-06-22	2010-08-30
	2010-05-09	2010-05-26	2010-06-22	2010-08-31
	2010-05-09	2010-05-23	2010-06-22	2010-08-31
	2010-05-09	2010-05-24	2010-06-21	2010-08-29
	2010-05-09	2010-05-24	2010-06-21	2010-08-29
	2010-05-09	2010-05-23	2010-06-23	2010-08-30
	2010-05-09	2010-05-24	2010-06-22	2010-08-29
	2010-05-09	2010-05-25	2010-06-22	2010-08-30
	2010-05-09	2010-05-24	2010-06-22	2010-08-30
	2010-05-09	2010-05-23	2010-06-22	2010-08-30
	2010-05-09	2010-05-25	2010-06-21	2010-08-29
	2010-05-09	2010-05-24	2010-06-22	2010-08-29
	2010-05-09	2010-05-25	2010-06-22	2010-08-29
	2010-05-09	2010-05-25	2010-06-21	2010-08-30
	2010-05-09	2010-05-23	2010-06-22	2010-08-30
	2010-05-09	2010-05-23	2010-06-22	2010-08-30
	2010-05-09	2010-05-24	2010-06-22	2010-08-30
	2010-05-09	2010-05-24	2010-06-21	2010-08-31
	2010-05-09	2010-05-23	2010-06-22	2010-08-31
	2010-05-09	2010-05-24	2010-06-23	2010-08-30
	2010-05-09	2010-05-25	2010-06-22	2010-08-30
	2010-05-09	2010-05-24	2010-06-22	2010-08-30
	2010-05-09	2010-05-24	2010-06-22	2010-08-30
	2010-05-09	2010-05-24	2010-06-22	2010-08-30
	2010-05-09	2010-05-24	2010-06-22	2010-08-30
Hujiao 07-2123	2010-05-09	2010-05-25	2010-06-19	2010-08-11
	2010-05-09	2010-05-24	2010-06-18	2010-08-12
	2010-05-09	2010-05-27	2010-06-18	2010-08-11
	2010-05-09	2010-05-25	2010-06-19	2010-08-12
	2010-05-09	2010-05-27	2010-06-19	2010-08-11
	2010-05-09	2010-05-24	2010-06-19	2010-08-11
	2010-05-09	2010-05-24	2010-06-19	2010-08-11
	2010-05-09	2010-05-23	2010-06-19	2010-08-11
	2010-05-09	2010-05-25	2010-06-19	2010-08-12
	2010-05-09	2010-05-24	2010-06-19	2010-08-12
	2010-05-09	2010-05-24	2010-06-19	2010-08-12
	2010-05-09	2010-05-25	2010-06-19	2010-08-12
	2010-05-09	2010-05-23	2010-06-19	2010-08-12
	2010-05-09	2010-05-24	2010-06-19	2010-08-12
	2010-05-09	2010-05-24	2010-06-19	2010-08-11
	2010-05-09	2010-05-25	2010-06-19	2010-08-11
	2010-05-09	2010-05-23	2010-06-19	2010-08-12
	2010-05-09	2010-05-26	2010-06-19	2010-08-12
	2010-05-09	2010-05-25	2010-06-19	2010-08-12
	2010-05-09	2010-05-23	2010-06-19	2010-08-12
	2010-05-09	2010-05-26	2010-06-19	2010-08-12
	2010-05-09	2010-05-23	2010-06-19	2010-08-11
	2010-05-09	2010-05-24	2010-06-19	2010-08-11
	2010-05-09	2010-05-24	2010-06-19	2010-08-11
	2010-05-09	2010-05-24	2010-06-19	2010-08-12
	2010-05-09	2010-05-26	2010-06-19	2010-08-12
	2010-05-09	2010-05-24	2010-06-19	2010-08-12
	2010-05-09	2010-05-24	2010-06-19	2010-08-11
	2010-05-09	2010-05-24	2010-06-19	2010-08-11
	2010-05-09	2010-05-24	2010-06-19	2010-08-12
Dongnong 36	2010-05-09	2010-05-24	2010-06-23	2010-08-17
	2010-05-09	2010-05-23	2010-06-24	2010-08-17
	2010-05-09	2010-05-24	2010-06-23	2010-08-17
	2010-05-09	2010-05-24	2010-06-24	2010-08-17
	2010-05-09	2010-05-24	2010-06-25	2010-08-17
	2010-05-09	2010-05-24	2010-06-23	2010-08-17
	2010-05-09	2010-05-23	2010-06-24	2010-08-17
	2010-05-09	2010-05-24	2010-06-23	2010-08-18
	2010-05-09	2010-05-24	2010-06-23	2010-08-17
	2010-05-09	2010-05-23	2010-06-23	2010-08-18
	2010-05-09	2010-05-23	2010-06-24	2010-08-18
	2010-05-09	2010-05-24	2010-06-24	2010-08-18
	2010-05-09	2010-05-23	2010-06-23	2010-08-17
	2010-05-09	2010-05-24	2010-06-24	2010-08-17
	2010-05-09	2010-05-26	2010-06-23	2010-08-18
	2010-05-09	2010-05-25	2010-06-24	2010-08-17
	2010-05-09	2010-05-24	2010-06-23	2010-08-18
	2010-05-09	NA	NA	NA
	2010-05-09	NA	NA	NA
	2010-05-09	NA	NA	NA
	2010-05-09	NA	NA	NA
	2010-05-09	NA	NA	NA
	2010-05-09	NA	NA	NA
	2010-05-09	NA	NA	NA
	2010-05-09	NA	NA	NA
	2010-05-09	NA	NA	NA
	2010-05-09	NA	NA	NA
	2010-05-09	NA	NA	NA
	2010-05-09	NA	NA	NA
	2010-05-09	NA	NA	NA
Hefeng 37	2010-05-09	2010-05-24	2010-06-23	2010-08-31
	2010-05-09	2010-05-23	2010-06-23	2010-08-31
	2010-05-09	2010-05-23	2010-06-24	2010-08-31
	2010-05-09	2010-05-24	2010-06-24	2010-08-31
	2010-05-09	2010-05-25	2010-06-24	2010-08-30
	2010-05-09	2010-05-23	2010-06-24	2010-08-30
	2010-05-09	2010-05-25	2010-06-23	2010-08-31
	2010-05-09	2010-05-24	2010-06-24	2010-08-29
	2010-05-09	2010-05-23	2010-06-24	2010-08-30
	2010-05-09	2010-05-23	2010-06-24	2010-08-30
	2010-05-09	2010-05-24	2010-06-25	2010-08-29
	2010-05-09	2010-05-24	2010-06-24	2010-08-31
	2010-05-09	2010-05-23	2010-06-24	2010-08-30
	2010-05-09	2010-05-24	2010-06-23	2010-08-30
	2010-05-09	2010-05-23	2010-06-25	2010-08-31
	2010-05-09	2010-05-22	2010-06-23	2010-08-31
	2010-05-09	2010-05-23	2010-06-23	2010-08-29
	2010-05-09	2010-05-23	2010-06-24	2010-08-29
	2010-05-09	2010-05-24	2010-06-23	2010-08-29
	2010-05-09	2010-05-23	2010-06-23	2010-08-30
	2010-05-09	2010-05-24	2010-06-23	2010-08-30
	2010-05-09	2010-05-22	2010-06-23	2010-08-31
	2010-05-09	2010-05-23	2010-06-25	2010-08-31
	2010-05-09	NA	NA	NA
	2010-05-09	NA	NA	NA
	2010-05-09	NA	NA	NA
	2010-05-09	NA	NA	NA
	2010-05-09	NA	NA	NA
	2010-05-09	NA	NA	NA
	2010-05-09	NA	NA	NA
Huajiang 2	2010-05-09	2010-05-24	2010-07-04	2010-09-04
	2010-05-09	2010-05-25	2010-07-01	2010-09-04
	2010-05-09	2010-05-25	2010-07-04	2010-09-05
	2010-05-09	2010-05-25	2010-07-03	2010-09-05
	2010-05-09	2010-05-25	2010-07-04	2010-09-05
	2010-05-09	2010-05-24	2010-07-01	2010-09-05
	2010-05-09	2010-05-23	2010-07-04	2010-09-05
	2010-05-09	2010-05-24	2010-07-04	2010-09-05
	2010-05-09	2010-05-25	2010-07-02	2010-09-04
	2010-05-09	2010-05-24	2010-07-04	2010-09-05
	2010-05-09	2010-05-24	2010-07-04	2010-09-05
	2010-05-09	2010-05-24	2010-07-02	2010-09-04
	2010-05-09	2010-05-23	2010-07-02	2010-09-04
	2010-05-09	2010-05-24	2010-07-04	2010-09-04
	2010-05-09	2010-05-24	2010-07-02	2010-09-04
	2010-05-09	2010-05-24	2010-07-04	2010-09-05
	2010-05-09	2010-05-25	2010-07-03	2010-09-05
	2010-05-09	2010-05-25	2010-07-04	2010-09-04
	2010-05-09	2010-05-24	2010-07-03	2010-09-04
	2010-05-09	2010-05-24	2010-07-02	2010-09-04
	2010-05-09	2010-05-24	2010-07-04	2010-09-05
	2010-05-09	2010-05-23	2010-07-04	2010-09-05
	2010-05-09	2010-05-24	2010-07-03	2010-09-05
	2010-05-09	2010-05-25	2010-07-01	2010-09-05
	2010-05-09	2010-05-24	2010-07-02	2010-09-04
	2010-05-09	2010-05-24	2010-07-03	2010-09-04
	2010-05-09	2010-05-24	2010-07-02	2010-09-04
	2010-05-09	2010-05-23	2010-07-03	2010-09-04
	2010-05-09	2010-05-23	2010-07-03	2010-09-04
	2010-05-09	2010-05-24	2010-07-01	2010-09-04
Huajiang 3	2010-05-09	2010-05-23	2010-07-11	2010-09-22
	2010-05-09	2010-05-23	2010-07-12	2010-09-21
	2010-05-09	2010-05-24	2010-07-12	2010-09-21
	2010-05-09	2010-05-26	2010-07-12	2010-09-22
	2010-05-09	2010-05-25	2010-07-13	2010-09-21
	2010-05-09	2010-05-23	2010-07-12	2010-09-21
	2010-05-09	2010-05-23	2010-07-12	2010-09-21
	2010-05-09	2010-05-23	2010-07-12	2010-09-21
	2010-05-09	2010-05-25	2010-07-12	2010-09-21
	2010-05-09	2010-05-23	2010-07-12	2010-09-22
	2010-05-09	2010-05-23	2010-07-15	2010-09-21
	2010-05-09	2010-05-23	2010-07-10	2010-09-21
	2010-05-09	2010-05-23	2010-07-12	2010-09-21
	2010-05-09	2010-05-23	2010-07-12	2010-09-23
	2010-05-09	2010-05-23	2010-07-12	2010-09-21
	2010-05-09	2010-05-23	2010-07-12	2010-09-21
	2010-05-09	2010-05-23	2010-07-12	2010-09-22
	2010-05-09	2010-05-23	2010-07-13	2010-09-21
	2010-05-09	2010-05-23	2010-07-13	2010-09-21
	2010-05-09	2010-05-24	2010-07-12	2010-09-22
	2010-05-09	2010-05-23	2010-07-12	2010-09-22
	2010-05-09	2010-05-22	2010-07-12	2010-09-21
	2010-05-09	2010-05-23	2010-07-12	2010-09-22
	2010-05-09	2010-05-23	2010-07-12	2010-09-22
	2010-05-09	2010-05-23	2010-07-12	2010-09-23
	2010-05-09	2010-05-23	2010-07-12	2010-09-21
	2010-05-09	NA	NA	NA
	2010-05-09	NA	NA	NA
	2010-05-09	NA	NA	NA
	2010-05-09	NA	NA	NA
Suinong 14	2010-05-09	2010-05-24	2010-07-02	NA
	2010-05-09	2010-05-24	2010-07-02	NA
	2010-05-09	2010-05-24	2010-07-02	NA
	2010-05-09	2010-05-22	2010-07-02	NA
	2010-05-09	2010-05-22	2010-07-02	NA
	2010-05-09	2010-05-23	2010-07-03	NA
	2010-05-09	2010-05-23	2010-07-02	NA
	2010-05-09	2010-05-24	2010-07-01	NA
	2010-05-09	2010-05-24	2010-07-02	NA
	2010-05-09	2010-05-24	2010-07-01	NA
	2010-05-09	2010-05-23	2010-07-02	NA
	2010-05-09	2010-05-24	2010-07-02	NA
	2010-05-09	2010-05-24	2010-07-01	NA
	2010-05-09	2010-05-25	2010-07-02	NA
	2010-05-09	2010-05-22	2010-07-01	NA
	2010-05-09	2010-05-23	2010-07-02	NA
	2010-05-09	NA	NA	NA
	2010-05-09	NA	NA	NA
	2010-05-09	NA	NA	NA
[truncated: 791 more rows]

## Sheet: 2011ori
Soybean Variety	The sowing day	The day to emergence (VE)	The day to beginning bloom (R1)	The day to beginning maturity (R7)
Star 4/75	2011-05-09	2011-05-29	2011-07-01	2011-08-11
	2011-05-09	2011-05-29	2011-07-01	2011-08-12
	2011-05-09	2011-05-29	2011-07-01	2011-08-12
	2011-05-09	2011-05-29	2011-07-01	2011-08-12
	2011-05-09	2011-05-30	2011-07-03	2011-08-10
	2011-05-09	2011-05-29	2011-07-01	2011-08-11
	2011-05-09	2011-05-29	2011-07-02	2011-08-12
	2011-05-09	2011-05-29	2011-07-02	2011-08-10
	2011-05-09	2011-05-29	2011-07-02	2011-08-09
	2011-05-09	2011-05-30	2011-06-30	2011-08-09
	2011-05-09	2011-05-30	2011-07-03	2011-08-09
	2011-05-09	2011-05-29	2011-07-02	2011-08-11
	2011-05-09	2011-05-29	2011-06-30	2011-08-12
	2011-05-09	2011-05-30	2011-07-02	2011-08-12
	2011-05-09	2011-05-29	2011-07-02	2011-08-11
	2011-05-09	2011-05-29	2011-07-02	2011-08-10
	2011-05-09	2011-05-30	2011-07-02	2011-08-09
	2011-05-09	2011-05-29	2011-07-03	2011-08-10
	2011-05-09	2011-05-29	2011-07-02	2011-08-10
	2011-05-09	2011-05-29	2011-07-02	2011-08-10
	2011-05-09	2011-05-30	2011-07-02	2011-08-10
	2011-05-09	2011-05-30	2011-07-02	2011-08-11
	2011-05-09	2011-05-30	2011-07-02	2011-08-12
	2011-05-09	2011-05-29	2011-07-02	2011-08-12
	2011-05-09	2011-05-30	2011-07-01	2011-08-10
	2011-05-09	2011-05-29	2011-06-30	2011-08-12
	2011-05-09	2011-05-30	2011-07-02	2011-08-11
	2011-05-09	2011-05-29	2011-07-02	2011-08-10
	2011-05-09	2011-05-30	2011-06-30	2011-08-10
	2011-05-09	2011-05-29	2011-06-30	2011-08-10
R-4	2011-05-09	2011-05-30	2011-06-30	2011-08-08
	2011-05-09	2011-05-30	2011-07-03	2011-08-10
	2011-05-09	2011-05-29	2011-07-03	2011-08-10
	2011-05-09	2011-05-29	2011-07-03	2011-08-09
	2011-05-09	2011-05-30	2011-07-02	2011-08-10
	2011-05-09	2011-05-30	2011-06-30	2011-08-08
	2011-05-09	2011-05-30	2011-07-04	2011-08-09
	2011-05-09	2011-05-30	2011-06-30	2011-08-10
	2011-05-09	2011-05-29	2011-06-30	2011-08-10
	2011-05-09	2011-05-29	2011-07-02	2011-08-10
	2011-05-09	2011-05-30	2011-07-03	2011-08-10
	2011-05-09	2011-05-29	2011-06-30	2011-08-10
	2011-05-09	2011-05-29	2011-06-30	2011-08-10
	2011-05-09	2011-05-29	2011-07-02	2011-08-09
	2011-05-09	2011-05-30	2011-06-30	2011-08-09
	2011-05-09	2011-05-29	2011-06-30	2011-08-09
	2011-05-09	2011-05-29	2011-07-01	2011-08-09
	2011-05-09	2011-05-29	2011-06-30	2011-08-09
	2011-05-09	2011-05-29	2011-07-03	2011-08-09
	2011-05-09	2011-05-29	2011-07-02	2011-08-10
	2011-05-09	2011-05-29	2011-07-03	2011-08-09
	2011-05-09	2011-05-29	2011-07-03	2011-08-10
	2011-05-09	2011-05-30	2011-06-30	2011-08-10
	2011-05-09	2011-05-29	2011-07-02	2011-08-10
	2011-05-09	2011-05-29	2011-06-30	2011-08-09
	2011-05-09	NA	NA	NA
	2011-05-09	NA	NA	NA
	2011-05-09	NA	NA	NA
	2011-05-09	NA	NA	NA
	2011-05-09	NA	NA	NA
Hujiao 07-2479	2011-05-09	2011-05-30	2011-06-30	2011-08-14
	2011-05-09	2011-05-29	2011-06-30	2011-08-14
	2011-05-09	2011-05-29	2011-06-30	2011-08-14
	2011-05-09	2011-05-30	2011-07-01	2011-08-14
	2011-05-09	2011-05-30	2011-06-29	2011-08-14
	2011-05-09	2011-05-30	2011-06-29	2011-08-14
	2011-05-09	2011-05-30	2011-06-30	2011-08-14
	2011-05-09	2011-05-29	2011-06-30	2011-08-14
	2011-05-09	2011-05-30	2011-06-30	2011-08-14
	2011-05-09	2011-05-30	2011-06-30	2011-08-14
	2011-05-09	NA	NA	NA
	2011-05-09	NA	NA	NA
	2011-05-09	NA	NA	NA
	2011-05-09	NA	NA	NA
	2011-05-09	NA	NA	NA
	2011-05-09	NA	NA	NA
	2011-05-09	NA	NA	NA
	2011-05-09	NA	NA	NA
	2011-05-09	NA	NA	NA
	2011-05-09	NA	NA	NA
	2011-05-09	NA	NA	NA
	2011-05-09	NA	NA	NA
	2011-05-09	NA	NA	NA
	2011-05-09	NA	NA	NA
	2011-05-09	NA	NA	NA
	2011-05-09	NA	NA	NA
	2011-05-09	NA	NA	NA
	2011-05-09	NA	NA	NA
	2011-05-09	NA	NA	NA
	2011-05-09	NA	NA	NA
Hujiao 07-2123	2011-05-09	2011-05-30	2011-06-29	2011-08-10
	2011-05-09	2011-05-29	2011-06-30	2011-08-10
	2011-05-09	2011-05-30	2011-06-30	2011-08-12
	2011-05-09	2011-05-30	2011-06-29	2011-08-10
	2011-05-09	2011-05-29	2011-06-29	2011-08-10
	2011-05-09	2011-05-29	2011-06-29	2011-08-11
	2011-05-09	2011-05-29	2011-06-29	2011-08-10
	2011-05-09	2011-05-29	2011-06-29	2011-08-10
	2011-05-09	2011-05-29	2011-06-29	2011-08-12
	2011-05-09	2011-05-29	2011-06-29	2011-08-12
	2011-05-09	2011-05-29	2011-06-30	2011-08-12
	2011-05-09	2011-05-29	2011-06-30	2011-08-12
	2011-05-09	2011-05-29	2011-06-29	2011-08-12
	2011-05-09	2011-05-29	2011-06-29	2011-08-12
	2011-05-09	2011-05-29	2011-06-29	2011-08-12
	2011-05-09	2011-05-30	2011-06-30	2011-08-12
	2011-05-09	2011-05-29	2011-06-29	2011-08-12
	2011-05-09	2011-05-30	2011-06-29	2011-08-10
	2011-05-09	2011-05-30	2011-06-29	2011-08-09
	2011-05-09	2011-05-30	2011-06-29	2011-08-14
	2011-05-09	2011-05-30	2011-06-29	2011-08-14
	2011-05-09	NA	NA	NA
	2011-05-09	NA	NA	NA
	2011-05-09	NA	NA	NA
	2011-05-09	NA	NA	NA
	2011-05-09	NA	NA	NA
	2011-05-09	NA	NA	NA
	2011-05-09	NA	NA	NA
	2011-05-09	NA	NA	NA
	2011-05-09	NA	NA	NA
Paula	2011-05-09	2011-05-29	2011-06-28	2011-08-14
	2011-05-09	2011-05-29	2011-06-28	2011-08-16
	2011-05-09	2011-05-29	2011-06-28	2011-08-17
	2011-05-09	2011-05-29	2011-06-28	2011-08-16
	2011-05-09	2011-05-29	2011-06-28	2011-08-14
	2011-05-09	2011-05-29	2011-06-29	2011-08-13
	2011-05-09	2011-05-29	2011-06-28	2011-08-13
	2011-05-09	2011-05-30	2011-06-28	2011-08-13
	2011-05-09	2011-05-30	2011-06-28	2011-08-14
	2011-05-09	2011-05-30	2011-06-28	2011-08-14
	2011-05-09	2011-05-30	2011-06-28	2011-08-16
	2011-05-09	2011-05-30	2011-06-29	2011-08-16
	2011-05-09	2011-05-29	2011-06-29	2011-08-13
	2011-05-09	2011-05-30	2011-06-28	2011-08-16
	2011-05-09	2011-05-29	2011-06-29	2011-08-17
	2011-05-09	2011-05-29	2011-06-28	2011-08-14
	2011-05-09	2011-05-29	2011-06-28	2011-08-16
	2011-05-09	2011-05-29	2011-06-28	2011-08-17
	2011-05-09	2011-05-29	2011-06-29	2011-08-16
	2011-05-09	2011-05-29	2011-06-28	2011-08-17
	2011-05-09	2011-05-29	2011-06-29	2011-08-16
	2011-05-09	2011-05-30	2011-06-28	2011-08-14
	2011-05-09	NA	NA	NA
	2011-05-09	NA	NA	NA
	2011-05-09	NA	NA	NA
	2011-05-09	NA	NA	NA
	2011-05-09	NA	NA	NA
	2011-05-09	NA	NA	NA
	2011-05-09	NA	NA	NA
	2011-05-09	NA	NA	NA
R-3	2011-05-09	2011-05-28	2011-07-06	2011-08-13
	2011-05-09	2011-05-30	2011-07-09	2011-08-13
	2011-05-09	2011-05-30	2011-07-09	2011-08-15
	2011-05-09	2011-05-29	2011-07-09	2011-08-14
	2011-05-09	2011-05-30	2011-07-09	2011-08-14
	2011-05-09	2011-05-30	2011-07-09	2011-08-14
	2011-05-09	2011-05-30	2011-07-09	2011-08-14
	2011-05-09	2011-05-30	2011-07-06	2011-08-14
	2011-05-09	2011-05-30	2011-07-09	2011-08-14
	2011-05-09	2011-05-29	2011-07-09	2011-08-15
	2011-05-09	2011-05-29	2011-07-08	2011-08-15
	2011-05-09	2011-05-29	2011-07-09	2011-08-14
	2011-05-09	2011-05-30	2011-07-09	2011-08-15
	2011-05-09	2011-05-30	2011-07-09	2011-08-14
	2011-05-09	2011-05-29	2011-07-06	2011-08-13
	2011-05-09	2011-05-29	2011-07-06	2011-08-15
	2011-05-09	2011-05-30	2011-07-09	2011-08-13
	2011-05-09	2011-05-30	2011-07-06	2011-08-14
	2011-05-09	2011-05-30	2011-07-09	2011-08-15
	2011-05-09	2011-05-30	2011-07-05	2011-08-15
	2011-05-09	2011-05-30	2011-07-09	2011-08-15
	2011-05-09	NA	NA	NA
	2011-05-09	NA	NA	NA
	2011-05-09	NA	NA	NA
	2011-05-09	NA	NA	NA
	2011-05-09	NA	NA	NA
	2011-05-09	NA	NA	NA
	2011-05-09	NA	NA	NA
	2011-05-09	NA	NA	NA
	2011-05-09	NA	NA	NA
Lingbei 8	2011-05-09	2011-05-29	2011-07-08	2011-08-17
	2011-05-09	2011-05-29	2011-07-09	2011-08-17
	2011-05-09	2011-05-30	2011-07-08	2011-08-17
	2011-05-09	2011-05-30	2011-07-09	2011-08-17
	2011-05-09	2011-05-29	2011-07-08	2011-08-17
	2011-05-09	2011-05-30	2011-07-09	2011-08-16
	2011-05-09	2011-05-29	2011-07-09	2011-08-16
	2011-05-09	2011-05-29	2011-07-08	2011-08-16
	2011-05-09	2011-05-30	2011-07-09	2011-08-17
	2011-05-09	2011-05-30	2011-07-07	2011-08-16
	2011-05-09	2011-05-29	2011-07-09	2011-08-16
	2011-05-09	2011-05-29	2011-07-10	2011-08-16
	2011-05-09	2011-05-29	2011-07-09	2011-08-17
	2011-05-09	2011-05-30	2011-07-10	2011-08-16
	2011-05-09	2011-05-30	2011-07-09	2011-08-17
	2011-05-09	2011-05-30	2011-07-08	2011-08-18
	2011-05-09	2011-05-30	2011-07-09	2011-08-17
	2011-05-09	2011-05-29	2011-07-09	2011-08-17
	2011-05-09	2011-05-30	2011-07-08	2011-08-17
	2011-05-09	2011-05-29	2011-07-09	2011-08-17
	2011-05-09	2011-05-30	2011-07-08	2011-08-17
	2011-05-09	2011-05-30	2011-07-09	2011-08-16
	2011-05-09	2011-05-30	2011-07-08	2011-08-16
	2011-05-09	2011-05-29	2011-07-09	2011-08-17
	2011-05-09	2011-05-29	2011-07-09	2011-08-17
	2011-05-09	2011-05-30	2011-07-09	2011-08-17
	2011-05-09	2011-05-30	2011-07-09	2011-08-17
	2011-05-09	2011-05-30	2011-07-09	2011-08-17
	2011-05-09	2011-05-30	2011-07-09	2011-08-16
	2011-05-09	2011-05-30	2011-07-09	2011-08-16
Dongnong 41-C	2011-05-09	2011-05-30	2011-07-04	2011-08-21
	2011-05-09	2011-05-31	2011-07-04	2011-08-21
	2011-05-09	2011-05-29	2011-07-04	2011-08-20
	2011-05-09	2011-05-31	2011-07-04	2011-08-20
	2011-05-09	2011-05-30	2011-07-04	2011-08-21
	2011-05-09	2011-05-31	2011-07-04	2011-08-21
	2011-05-09	2011-05-31	2011-07-04	2011-08-20
	2011-05-09	2011-05-30	2011-07-03	2011-08-20
	2011-05-09	2011-05-31	2011-07-04	2011-08-20
	2011-05-09	2011-05-31	2011-07-05	2011-08-20
	2011-05-09	2011-05-31	2011-07-04	2011-08-21
	2011-05-09	2011-05-30	2011-07-02	2011-08-21
	2011-05-09	2011-05-31	2011-07-02	2011-08-20
	2011-05-09	2011-05-30	2011-07-02	2011-08-20
	2011-05-09	2011-05-31	2011-07-04	2011-08-20
	2011-05-09	2011-05-30	2011-07-04	2011-08-21
	2011-05-09	2011-05-31	2011-07-02	2011-08-20
	2011-05-09	2011-05-30	2011-07-04	2011-08-20
	2011-05-09	2011-05-31	2011-07-02	2011-08-20
	2011-05-09	2011-05-31	2011-07-04	2011-08-20
	2011-05-09	2011-05-31	2011-07-02	2011-08-21
	2011-05-09	2011-05-31	2011-07-03	2011-08-21
	2011-05-09	2011-05-31	2011-07-04	2011-08-20
	2011-05-09	2011-05-31	2011-07-04	2011-08-20
	2011-05-09	2011-05-31	2011-07-04	2011-08-21
	2011-05-09	2011-05-30	2011-07-04	2011-08-20
	2011-05-09	2011-05-31	2011-07-04	2011-08-21
	2011-05-09	2011-05-31	2011-07-04	2011-08-21
	2011-05-09	2011-05-31	2011-07-04	2011-08-21
	2011-05-09	2011-05-31	2011-07-04	2011-08-20
Dongnong 41	2011-05-09	2011-05-30	2011-07-03	2011-08-16
	2011-05-09	2011-05-30	2011-07-03	2011-08-16
	2011-05-09	2011-05-30	2011-07-03	2011-08-17
	2011-05-09	2011-05-30	2011-07-03	2011-08-16
	2011-05-09	2011-05-30	2011-07-03	2011-08-16
	2011-05-09	2011-05-30	2011-07-03	2011-08-16
	2011-05-09	2011-05-30	2011-07-04	2011-08-16
	2011-05-09	2011-05-30	2011-07-04	2011-08-16
	2011-05-09	2011-05-30	2011-07-04	2011-08-17
	2011-05-09	2011-05-30	2011-07-04	2011-08-16
	2011-05-09	2011-05-30	2011-07-04	2011-08-16
	2011-05-09	2011-05-31	2011-07-04	2011-08-16
	2011-05-09	2011-05-31	2011-07-04	2011-08-17
	2011-05-09	2011-05-31	2011-07-04	2011-08-17
	2011-05-09	2011-05-31	2011-07-04	2011-08-16
	2011-05-09	2011-05-31	2011-07-04	2011-08-16
	2011-05-09	2011-05-30	2011-07-04	2011-08-16
	2011-05-09	2011-05-30	2011-07-03	2011-08-16
	2011-05-09	2011-05-31	2011-07-03	2011-08-16
	2011-05-09	2011-05-31	2011-07-03	2011-08-16
	2011-05-09	2011-05-30	2011-07-04	2011-08-16
	2011-05-09	2011-05-30	2011-07-04	2011-08-17
	2011-05-09	2011-05-30	2011-07-04	2011-08-16
	2011-05-09	2011-05-30	2011-07-04	2011-08-16
	2011-05-09	2011-05-30	2011-07-04	2011-08-17
	2011-05-09	2011-05-30	2011-07-04	2011-08-15
	2011-05-09	2011-05-31	2011-07-04	2011-08-16
	2011-05-09	2011-05-31	2011-07-04	2011-08-16
	2011-05-09	2011-05-30	2011-07-04	2011-08-16
	2011-05-09	2011-05-30	2011-07-04	2011-08-16
Dongnong 36	2011-05-09	2011-05-29	2011-07-06	2011-08-14
	2011-05-09	2011-05-29	2011-07-07	2011-08-14
	2011-05-09	2011-05-29	2011-07-07	2011-08-13
	2011-05-09	2011-05-29	2011-07-05	2011-08-14
	2011-05-09	2011-05-29	2011-07-06	2011-08-14
	2011-05-09	2011-05-29	2011-07-07	2011-08-14
	2011-05-09	2011-05-29	2011-07-05	2011-08-15
	2011-05-09	2011-05-29	2011-07-06	2011-08-15
	2011-05-09	2011-05-29	2011-07-05	2011-08-13
	2011-05-09	2011-05-29	2011-07-07	2011-08-15
	2011-05-09	2011-05-29	2011-07-05	2011-08-15
	2011-05-09	2011-05-29	2011-07-06	2011-08-15
	2011-05-09	2011-05-29	2011-07-04	2011-08-14
	2011-05-09	2011-05-29	2011-07-07	2011-08-14
	2011-05-09	2011-05-29	2011-07-06	2011-08-14
	2011-05-09	2011-05-29	2011-07-06	2011-08-15
	2011-05-09	2011-05-29	2011-07-07	2011-08-14
	2011-05-09	2011-05-29	2011-07-06	2011-08-13
	2011-05-09	2011-05-29	2011-07-07	2011-08-15
	2011-05-09	2011-05-29	2011-07-06	2011-08-15
	2011-05-09	2011-05-29	2011-07-07	2011-08-15
	2011-05-09	2011-05-29	2011-07-07	2011-08-14
	2011-05-09	2011-05-29	2011-07-05	2011-08-14
	2011-05-09	2011-05-29	2011-07-06	2011-08-14
	2011-05-09	2011-05-29	2011-07-07	2011-08-15
	2011-05-09	2011-05-29	2011-07-07	2011-08-15
	2011-05-09	2011-05-29	2011-07-07	2011-08-15
	2011-05-09	2011-05-29	2011-07-06	2011-08-15
	2011-05-09	2011-05-29	2011-07-07	2011-08-14
	2011-05-09	2011-05-29	2011-07-06	2011-08-14
Heihe 49	2011-05-09	2011-05-30	2011-06-30	2011-08-14
	2011-05-09	2011-05-31	2011-06-30	2011-08-14
	2011-05-09	2011-05-30	2011-06-29	2011-08-13
	2011-05-09	2011-05-30	2011-06-30	2011-08-14
	2011-05-09	2011-05-30	2011-07-02	2011-08-14
	2011-05-09	2011-05-30	2011-07-02	2011-08-14
	2011-05-09	2011-05-31	2011-07-02	2011-08-14
	2011-05-09	2011-05-31	2011-07-02	2011-08-16
	2011-05-09	2011-05-31	2011-06-30	2011-08-14
	2011-05-09	2011-05-31	2011-07-02	2011-08-14
	2011-05-09	2011-05-30	2011-07-03	2011-08-15
	2011-05-09	2011-05-30	2011-06-30	2011-08-13
	2011-05-09	2011-05-30	2011-07-01	2011-08-14
	2011-05-09	2011-05-30	2011-07-02	2011-08-14
	2011-05-09	2011-05-30	2011-07-02	2011-08-15
	2011-05-09	2011-05-30	2011-07-02	2011-08-14
	2011-05-09	2011-05-31	2011-07-02	2011-08-14
	2011-05-09	NA	NA	NA
	2011-05-09	NA	NA	NA
	2011-05-09	NA	NA	NA
	2011-05-09	NA	NA	NA
	2011-05-09	NA	NA	NA
	2011-05-09	NA	NA	NA
	2011-05-09	NA	NA	NA
	2011-05-09	NA	NA	NA
	2011-05-09	NA	NA	NA
	2011-05-09	NA	NA	NA
	2011-05-09	NA	NA	NA
	2011-05-09	NA	NA	NA
	2011-05-09	NA	NA	NA
OAC Vision	2011-05-09	2011-05-30	2011-06-29	2011-08-25
	2011-05-09	2011-05-30	2011-06-29	2011-08-25
	2011-05-09	2011-05-30	2011-06-29	2011-08-25
	2011-05-09	2011-05-30	2011-06-29	2011-08-25
	2011-05-09	2011-05-30	2011-06-29	2011-08-25
	2011-05-09	2011-05-30	2011-06-30	2011-08-26
	2011-05-09	2011-05-29	2011-06-30	2011-08-25
	2011-05-09	2011-05-30	2011-06-29	2011-08-25
	2011-05-09	2011-05-29	2011-06-30	2011-08-25
	2011-05-09	2011-05-29	2011-06-30	2011-08-26
	2011-05-09	2011-05-29	2011-06-30	2011-08-26
	2011-05-09	2011-05-29	2011-06-30	2011-08-26
	2011-05-09	2011-05-30	2011-06-30	2011-08-25
	2011-05-09	2011-05-29	2011-06-30	2011-08-25
	2011-05-09	2011-05-30	2011-06-30	2011-08-25
	2011-05-09	2011-05-29	2011-06-29	2011-08-25
	2011-05-09	2011-05-30	2011-06-30	2011-08-25
	2011-05-09	2011-05-29	2011-06-30	2011-08-26
	2011-05-09	2011-05-30	2011-06-29	2011-08-25
	2011-05-09	2011-05-29	2011-06-29	2011-08-26
	2011-05-09	2011-05-30	2011-06-30	2011-08-25
	2011-05-09	2011-05-29	2011-06-30	2011-08-26
	2011-05-09	2011-05-29	2011-06-29	2011-08-26
	2011-05-09	2011-05-30	2011-06-29	2011-08-26
	2011-05-09	NA	NA	NA
	2011-05-09	NA	NA	NA
	2011-05-09	NA	NA	NA
	2011-05-09	NA	NA	NA
	2011-05-09	NA	NA	NA
	2011-05-09	NA	NA	NA
Canatto	2011-05-09	2011-06-02	2011-06-29	2011-09-02
	2011-05-09	2011-06-03	2011-06-30	2011-09-03
	2011-05-09	2011-06-03	2011-06-29	2011-09-02
	2011-05-09	2011-06-02	2011-06-30	2011-09-03
	2011-05-09	NA	NA	NA
	2011-05-09	NA	NA	NA
	2011-05-09	NA	NA	NA
	2011-05-09	NA	NA	NA
	2011-05-09	NA	NA	NA
	2011-05-09	NA	NA	NA
	2011-05-09	NA	NA	NA
	2011-05-09	NA	NA	NA
	2011-05-09	NA	NA	NA
	2011-05-09	NA	NA	NA
	2011-05-09	NA	NA	NA
	2011-05-09	NA	NA	NA
	2011-05-09	NA	NA	NA
	2011-05-09	NA	NA	NA
	2011-05-09	NA	NA	NA
	2011-05-09	NA	NA	NA
	2011-05-09	NA	NA	NA
	2011-05-09	NA	NA	NA
	2011-05-09	NA	NA	NA
	2011-05-09	NA	NA	NA
	2011-05-09	NA	NA	NA
	2011-05-09	NA	NA	NA
	2011-05-09	NA	NA	NA
	2011-05-09	NA	NA	NA
	2011-05-09	NA	NA	NA
	2011-05-09	NA	NA	NA
Maple Ridge	2011-05-09	2011-05-31	2011-07-06	2011-09-04
	2011-05-09	2011-05-30	2011-07-07	2011-09-04
	2011-05-09	2011-05-31	2011-07-06	2011-09-04
	2011-05-09	2011-05-31	2011-07-06	2011-09-04
	2011-05-09	2011-05-31	2011-07-07	2011-09-04
	2011-05-09	2011-05-31	2011-07-07	2011-09-05
	2011-05-09	2011-05-30	2011-07-07	2011-09-04
	2011-05-09	2011-05-31	2011-07-06	2011-09-04
	2011-05-09	2011-05-31	2011-07-07	2011-09-05
	2011-05-09	2011-05-31	2011-07-07	2011-09-04
	2011-05-09	2011-05-31	2011-07-06	2011-09-04
	2011-05-09	2011-05-30	2011-07-07	2011-09-05
	2011-05-09	2011-05-31	2011-07-06	2011-09-04
	2011-05-09	2011-05-31	2011-07-07	2011-09-04
	2011-05-09	2011-05-31	2011-07-07	2011-09-05
	2011-05-09	2011-05-31	2011-07-07	2011-09-04
	2011-05-09	2011-05-31	2011-07-07	2011-09-04
	2011-05-09	2011-05-31	2011-07-07	2011-09-05
	2011-05-09	2011-05-31	2011-07-06	2011-09-05
	2011-05-09	2011-05-31	2011-07-07	2011-09-05
	2011-05-09	2011-06-01	2011-07-06	2011-09-04
	2011-05-09	2011-05-31	2011-07-06	2011-09-04
	2011-05-09	2011-05-31	2011-07-07	2011-09-04
	2011-05-09	2011-06-01	2011-07-07	2011-09-05
	2011-05-09	2011-05-31	2011-07-07	2011-09-04
	2011-05-09	2011-05-31	2011-07-07	2011-09-04
	2011-05-09	2011-06-01	2011-07-08	2011-09-05
	2011-05-09	2011-05-31	2011-07-07	2011-09-04
	2011-05-09	2011-05-31	2011-07-06	2011-09-04
	2011-05-09	2011-05-31	2011-07-06	2011-09-04
MN0201	2011-05-09	2011-05-29	2011-07-08	2011-09-05
	2011-05-09	2011-05-30	2011-07-07	2011-09-07
	2011-05-09	2011-05-29	2011-07-08	2011-09-07
	2011-05-09	2011-05-29	2011-07-09	2011-09-06
	2011-05-09	2011-05-30	2011-07-08	2011-09-06
	2011-05-09	2011-05-29	2011-07-09	2011-09-06
	2011-05-09	2011-05-29	2011-07-06	2011-09-06
	2011-05-09	2011-05-29	2011-07-08	2011-09-06
	2011-05-09	2011-05-30	2011-07-09	2011-09-06
	2011-05-09	2011-05-30	2011-07-05	2011-09-06
	2011-05-09	2011-05-29	2011-07-09	2011-09-06
	2011-05-09	2011-05-30	2011-07-09	2011-09-06
	2011-05-09	2011-05-30	2011-07-09	2011-09-06
	2011-05-09	2011-05-30	2011-07-08	2011-09-06
	2011-05-09	2011-05-29	2011-07-05	2011-09-06
	2011-05-09	2011-05-29	2011-07-09	2011-09-06
	2011-05-09	2011-05-29	2011-07-08	2011-09-06
	2011-05-09	2011-05-30	2011-07-08	2011-09-06
	2011-05-09	2011-05-30	2011-07-08	2011-09-05
	2011-05-09	2011-05-29	2011-07-08	2011-09-05
	2011-05-09	2011-05-29	2011-07-08	2011-09-05
	2011-05-09	2011-05-29	2011-07-08	2011-09-05
	2011-05-09	2011-05-29	2011-07-09	2011-09-06
	2011-05-09	2011-05-29	2011-07-06	2011-09-05
	2011-05-09	2011-05-30	2011-07-09	2011-09-06
	2011-05-09	2011-05-29	2011-07-08	2011-09-05
	2011-05-09	2011-05-29	2011-07-08	2011-09-05
	2011-05-09	2011-05-30	2011-07-09	2011-09-05
	2011-05-09	2011-05-29	2011-07-09	2011-09-06
	2011-05-09	2011-05-29	2011-07-06	2011-09-06
Traill	2011-05-09	2011-05-30	2011-07-04	2011-09-05
	2011-05-09	2011-05-29	2011-07-03	2011-09-05
	2011-05-09	2011-05-30	2011-07-03	2011-09-05
	2011-05-09	2011-05-29	2011-07-01	2011-09-05
	2011-05-09	2011-05-30	2011-07-03	2011-09-05
	2011-05-09	2011-05-29	2011-07-01	2011-09-06
	2011-05-09	2011-05-30	2011-06-30	2011-09-06
	2011-05-09	2011-05-29	2011-07-03	2011-09-06
	2011-05-09	2011-05-29	2011-07-02	2011-09-06
	2011-05-09	2011-05-30	2011-07-03	2011-09-06
	2011-05-09	2011-05-30	2011-07-02	2011-09-05
	2011-05-09	2011-05-29	2011-07-03	2011-09-06
	2011-05-09	2011-05-29	2011-07-03	2011-09-06
	2011-05-09	2011-05-29	2011-07-03	2011-09-06
	2011-05-09	2011-05-29	2011-07-03	2011-09-05
	2011-05-09	2011-05-29	2011-07-01	2011-09-06
	2011-05-09	2011-05-29	2011-07-01	2011-09-05
	2011-05-09	2011-05-30	2011-07-01	2011-09-05
	2011-05-09	2011-05-30	2011-07-02	2011-09-06
	2011-05-09	2011-05-29	2011-06-30	2011-09-05
	2011-05-09	2011-05-30	2011-06-30	2011-09-06
	2011-05-09	2011-05-29	2011-07-01	2011-09-05
	2011-05-09	2011-05-30	2011-06-30	2011-09-06
	2011-05-09	2011-05-29	2011-06-30	2011-09-05
	2011-05-09	2011-05-30	2011-07-03	2011-09-05
	2011-05-09	2011-05-29	2011-07-02	2011-09-05
	2011-05-09	2011-05-29	2011-07-01	2011-09-06
	2011-05-09	2011-05-29	2011-07-01	2011-09-05
	2011-05-09	2011-05-29	2011-07-02	2011-09-06
	2011-05-09	2011-05-29	2011-07-02	2011-09-06
MN0901	2011-05-09	2011-05-30	2011-07-07	2011-09-22
	2011-05-09	2011-05-29	2011-07-07	2011-09-22
	2011-05-09	2011-05-30	2011-07-08	2011-09-21
	2011-05-09	2011-05-29	2011-07-08	2011-09-22
	2011-05-09	2011-05-30	2011-07-08	2011-09-22
	2011-05-09	2011-05-29	2011-07-08	2011-09-22
	2011-05-09	2011-05-30	2011-07-08	2011-09-22
	2011-05-09	2011-05-29	2011-07-04	2011-09-22
	2011-05-09	2011-05-29	2011-07-07	2011-09-22
	2011-05-09	2011-05-30	2011-07-08	2011-09-22
	2011-05-09	2011-05-30	2011-07-08	2011-09-22
	2011-05-09	2011-05-30	2011-07-09	2011-09-22
	2011-05-09	2011-05-30	2011-07-07	2011-09-22
	2011-05-09	2011-05-29	2011-07-07	2011-09-22
	2011-05-09	2011-05-29	2011-07-07	2011-09-22
	2011-05-09	2011-05-29	2011-07-08	2011-09-22
	2011-05-09	2011-05-29	2011-07-09	2011-09-22
	2011-05-09	2011-05-30	2011-07-07	2011-09-22
	2011-05-09	2011-05-29	2011-07-07	2011-09-22
	2011-05-09	2011-05-30	2011-07-09	2011-09-21
	2011-05-09	2011-05-29	2011-07-08	2011-09-21
	2011-05-09	2011-05-30	2011-07-07	2011-09-22
	2011-05-09	2011-05-29	2011-07-07	2011-09-22
	2011-05-09	2011-05-29	2011-07-06	2011-09-22
	2011-05-09	2011-05-30	2011-07-07	2011-09-22
	2011-05-09	2011-05-30	2011-07-07	2011-09-22
	2011-05-09	2011-05-30	2011-07-07	2011-09-22
	2011-05-09	2011-05-29	2011-07-09	2011-09-22
	2011-05-09	2011-05-30	2011-07-04	2011-09-22
	2011-05-09	2011-05-30	2011-07-07	2011-09-22
R-2	2011-05-09	2011-05-30	2011-07-02	2011-08-20
	2011-05-09	2011-05-30	2011-07-02	2011-08-20
	2011-05-09	2011-05-30	2011-07-02	2011-08-21
	2011-05-09	2011-05-30	2011-07-02	2011-08-22
	2011-05-09	2011-05-30	2011-07-02	2011-08-22
	2011-05-09	2011-05-30	2011-07-02	2011-08-22
	2011-05-09	2011-05-30	2011-07-02	2011-08-22
	2011-05-09	2011-05-30	2011-07-02	2011-08-22
	2011-05-09	2011-05-30	2011-06-30	2011-08-22
	2011-05-09	2011-05-29	2011-07-02	2011-08-22
	2011-05-09	2011-05-29	2011-07-02	2011-08-22
	2011-05-09	2011-05-29	2011-07-02	2011-08-22
	2011-05-09	2011-05-29	2011-07-02	2011-08-22
	2011-05-09	2011-05-30	2011-06-29	2011-08-22
	2011-05-09	2011-05-29	2011-07-02	2011-08-22
	2011-05-09	2011-05-30	2011-07-02	2011-08-21
	2011-05-09	2011-05-30	2011-07-02	2011-08-22
	2011-05-09	2011-05-29	2011-06-29	2011-08-22
	2011-05-09	2011-05-30	2011-07-02	2011-08-22
	2011-05-09	2011-05-30	2011-07-02	2011-08-22
	2011-05-09	2011-05-30	2011-07-02	2011-08-22
	2011-05-09	2011-05-29	2011-07-02	2011-08-22
	2011-05-09	2011-05-30	2011-07-02	2011-08-22
	2011-05-09	2011-05-29	2011-07-02	2011-08-22
	2011-05-09	2011-05-30	2011-07-02	2011-08-22
	2011-05-09	2011-05-29	2011-07-02	2011-08-22
	2011-05-09	2011-05-30	2011-06-29	2011-08-22
	2011-05-09	2011-05-29	2011-06-29	2011-08-22
	2011-05-09	2011-05-30	2011-07-02	2011-08-22
	2011-05-09	2011-05-29	2011-06-29	2011-08-22
Heihe 14	2011-05-09	2011-05-29	2011-07-06	2011-08-20
	2011-05-09	2011-05-31	2011-07-07	2011-08-20
	2011-05-09	2011-05-30	2011-07-06	2011-08-19
	2011-05-09	2011-05-29	2011-07-04	2011-08-20
	2011-05-09	2011-05-30	2011-07-05	2011-08-20
	2011-05-09	2011-05-29	2011-07-02	2011-08-20
	2011-05-09	2011-05-31	2011-07-02	2011-08-19
	2011-05-09	2011-05-30	2011-07-05	2011-08-19
	2011-05-09	2011-05-31	2011-07-07	2011-08-20
	2011-05-09	2011-05-29	2011-07-02	2011-08-20
	2011-05-09	2011-05-29	2011-07-03	2011-08-20
	2011-05-09	2011-05-29	2011-07-04	2011-08-20
	2011-05-09	2011-05-30	2011-07-01	2011-08-21
	2011-05-09	2011-05-31	2011-07-04	2011-08-21
	2011-05-09	2011-05-30	2011-07-02	2011-08-21
	2011-05-09	2011-05-30	2011-07-01	2011-08-20
	2011-05-09	2011-05-29	2011-07-04	2011-08-20
	2011-05-09	2011-05-31	2011-07-06	2011-08-20
	2011-05-09	2011-05-30	2011-07-06	2011-08-20
	2011-05-09	2011-05-29	2011-07-03	2011-08-21
	2011-05-09	2011-05-30	2011-07-03	2011-08-20
	2011-05-09	2011-05-29	2011-07-02	2011-08-20
	2011-05-09	2011-05-29	2011-07-06	2011-08-21
	2011-05-09	2011-05-30	2011-07-03	2011-08-20
	2011-05-09	2011-05-30	2011-07-03	2011-08-20
	2011-05-09	2011-05-31	2011-07-04	2011-08-20
	2011-05-09	2011-05-29	2011-07-03	2011-08-21
	2011-05-09	2011-05-29	2011-07-04	2011-08-21
	2011-05-09	2011-05-30	2011-07-02	2011-08-20
	2011-05-09	2011-05-29	2011-07-02	2011-08-20
Bista	2011-05-09	2011-05-30	2011-07-02	2011-08-20
	2011-05-09	2011-05-30	2011-07-04	2011-08-20
	2011-05-09	2011-05-31	2011-07-02	2011-08-20
	2011-05-09	2011-05-29	2011-07-05	2011-08-20
	2011-05-09	2011-05-30	2011-07-02	2011-08-20
	2011-05-09	2011-05-30	2011-07-02	2011-08-20
	2011-05-09	2011-05-30	2011-07-04	2011-08-20
	2011-05-09	2011-05-29	2011-07-02	2011-08-21
	2011-05-09	2011-05-29	2011-07-02	2011-08-21
	2011-05-09	2011-05-30	2011-07-02	2011-08-20
	2011-05-09	2011-05-29	2011-07-02	2011-08-20
	2011-05-09	2011-05-31	2011-07-02	2011-08-20
	2011-05-09	2011-05-30	2011-07-02	2011-08-20
	2011-05-09	2011-05-30	2011-07-04	2011-08-20
	2011-05-09	2011-05-30	2011-07-04	2011-08-20
	2011-05-09	2011-05-30	2011-07-02	2011-08-20
	2011-05-09	2011-05-29	2011-07-02	2011-08-20
	2011-05-09	2011-05-29	2011-06-30	2011-08-20
	2011-05-09	2011-05-30	2011-07-04	2011-08-20
	2011-05-09	2011-05-29	2011-07-02	2011-08-21
	2011-05-09	2011-05-29	2011-07-05	2011-08-20
	2011-05-09	2011-05-29	2011-07-02	2011-08-20
	2011-05-09	2011-05-30	2011-07-02	2011-08-21
	2011-05-09	2011-05-29	2011-07-02	2011-08-21
	2011-05-09	2011-05-30	2011-07-05	2011-08-20
	2011-05-09	2011-05-30	2011-07-02	2011-08-21
	2011-05-09	2011-05-30	2011-07-02	2011-08-21
	2011-05-09	2011-05-30	2011-07-02	2011-08-21
	2011-05-09	2011-05-29	2011-07-05	2011-08-20
	2011-05-09	2011-05-29	2011-07-02	2011-08-21
Heihe 44	2011-05-09	2011-05-30	2011-07-03	2011-08-20
	2011-05-09	2011-05-30	2011-06-30	2011-08-20
	2011-05-09	2011-05-29	2011-06-30	2011-08-20
	2011-05-09	2011-05-30	2011-06-30	2011-08-20
	2011-05-09	2011-05-30	2011-06-30	2011-08-20
	2011-05-09	2011-05-30	2011-06-30	2011-08-20
	2011-05-09	2011-05-29	2011-07-02	2011-08-20
	2011-05-09	2011-05-30	2011-06-30	2011-08-20
	2011-05-09	2011-05-29	2011-07-02	2011-08-20
	2011-05-09	2011-05-29	2011-07-02	2011-08-20
	2011-05-09	2011-05-29	2011-06-30	2011-08-20
	2011-05-09	2011-05-29	2011-07-05	2011-08-20
	2011-05-09	2011-05-29	2011-07-02	2011-08-20
	2011-05-09	2011-05-29	2011-07-02	2011-08-20
	2011-05-09	2011-05-30	2011-07-05	2011-08-20
	2011-05-09	2011-05-30	2011-07-02	2011-08-20
	2011-05-09	2011-05-30	2011-06-30	2011-08-20
	2011-05-09	2011-05-30	2011-06-30	2011-08-20
	2011-05-09	2011-05-30	2011-07-04	2011-08-21
	2011-05-09	2011-05-30	2011-07-02	2011-08-21
	2011-05-09	2011-05-30	2011-07-02	2011-08-21
	2011-05-09	2011-05-29	2011-07-04	2011-08-20
	2011-05-09	2011-05-29	2011-07-02	2011-08-21
	2011-05-09	2011-05-30	2011-07-04	2011-08-20
	2011-05-09	2011-05-30	2011-06-30	2011-08-20
	2011-05-09	2011-05-29	2011-07-02	2011-08-20
	2011-05-09	2011-05-30	2011-07-02	2011-08-20
	2011-05-09	2011-05-30	2011-07-02	2011-08-21
	2011-05-09	2011-05-29	2011-07-02	2011-08-20
	2011-05-09	2011-05-30	2011-07-02	2011-08-21
Heihe 41	2011-05-09	2011-05-29	2011-07-01	2011-08-24
	2011-05-09	2011-05-30	2011-06-30	2011-08-24
	2011-05-09	2011-05-30	2011-07-04	2011-08-24
	2011-05-09	2011-05-29	2011-07-05	2011-08-24
	2011-05-09	2011-05-30	2011-07-02	2011-08-24
	2011-05-09	2011-05-29	2011-06-30	2011-08-24
	2011-05-09	2011-05-29	2011-07-01	2011-08-24
	2011-05-09	2011-05-29	2011-07-02	2011-08-24
	2011-05-09	2011-05-30	2011-07-03	2011-08-24
	2011-05-09	2011-05-29	2011-06-30	2011-08-24
	2011-05-09	2011-05-30	2011-06-30	2011-08-23
	2011-05-09	2011-05-29	2011-07-02	2011-08-24
	2011-05-09	2011-05-30	2011-07-04	2011-08-24
	2011-05-09	2011-05-29	2011-07-06	2011-08-24
	2011-05-09	2011-05-30	2011-07-02	2011-08-24
	2011-05-09	2011-05-29	2011-07-02	2011-08-24
	2011-05-09	2011-05-30	2011-07-04	2011-08-24
	2011-05-09	2011-05-31	2011-07-04	2011-08-24
	2011-05-09	2011-05-30	2011-07-03	2011-08-24
	2011-05-09	2011-05-29	2011-07-04	2011-08-24
	2011-05-09	2011-05-30	2011-07-03	2011-08-24
	2011-05-09	2011-05-31	2011-07-04	2011-08-24
	2011-05-09	2011-05-31	2011-07-03	2011-08-24
	2011-05-09	2011-05-30	2011-07-05	2011-08-24
	2011-05-09	2011-05-30	2011-07-04	2011-08-24
	2011-05-09	2011-05-29	2011-07-06	2011-08-24
	2011-05-09	2011-05-30	2011-07-03	2011-08-24
	2011-05-09	2011-05-31	2011-07-05	2011-08-24
	2011-05-09	2011-05-31	2011-07-04	2011-08-24
	2011-05-09	2011-05-30	2011-07-03	2011-08-24
Heihe 35	2011-05-09	2011-05-29	2011-07-01	2011-08-20
	2011-05-09	2011-05-31	2011-06-30	2011-08-20
	2011-05-09	2011-05-29	2011-07-02	2011-08-20
	2011-05-09	2011-05-30	2011-07-02	2011-08-22
	2011-05-09	2011-05-30	2011-07-01	2011-08-22
	2011-05-09	2011-05-30	2011-06-30	2011-08-21
	2011-05-09	2011-05-30	2011-07-01	2011-08-21
	2011-05-09	2011-05-30	2011-07-01	2011-08-21
	2011-05-09	2011-05-31	2011-07-01	2011-08-20
	2011-05-09	2011-05-30	2011-06-30	2011-08-21
	2011-05-09	2011-05-31	2011-06-30	2011-08-21
	2011-05-09	2011-05-31	2011-07-01	2011-08-22
	2011-05-09	2011-05-30	2011-07-02	2011-08-20
	2011-05-09	2011-05-31	2011-07-01	2011-08-20
	2011-05-09	2011-05-30	2011-07-01	2011-08-20
	2011-05-09	2011-05-30	2011-07-02	2011-08-20
	2011-05-09	2011-05-31	2011-07-01	2011-08-20
	2011-05-09	2011-05-30	2011-07-01	2011-08-20
	2011-05-09	2011-05-30	2011-07-02	2011-08-20
	2011-05-09	2011-05-30	2011-07-01	2011-08-20
	2011-05-09	2011-05-30	2011-07-02	2011-08-20
	2011-05-09	2011-05-30	2011-06-30	2011-08-20
	2011-05-09	2011-05-29	2011-07-02	2011-08-20
	2011-05-09	2011-05-29	2011-07-01	2011-08-21
	2011-05-09	2011-05-29	2011-07-01	2011-08-20
	2011-05-09	2011-05-29	2011-07-02	2011-08-21
	2011-05-09	2011-05-29	2011-07-01	2011-08-20
	2011-05-09	2011-05-29	2011-07-02	2011-08-21
	2011-05-09	2011-05-30	2011-07-01	2011-08-21
	2011-05-09	2011-05-29	2011-07-02	2011-08-21
Kennong 8	2011-05-09	2011-05-29	2011-07-03	2011-08-22
	2011-05-09	2011-05-30	2011-06-30	2011-08-21
	2011-05-09	2011-05-30	2011-06-30	2011-08-23
	2011-05-09	2011-05-30	2011-06-30	2011-08-21
	2011-05-09	2011-05-29	2011-07-02	2011-08-21
	2011-05-09	2011-05-29	2011-07-03	2011-08-21
	2011-05-09	2011-05-30	2011-06-30	2011-08-21
	2011-05-09	2011-05-30	2011-06-30	2011-08-21
	2011-05-09	2011-05-31	2011-06-30	2011-08-23
	2011-05-09	2011-05-30	2011-06-30	2011-08-23
	2011-05-09	2011-05-30	2011-06-30	2011-08-21
	2011-05-09	2011-05-29	2011-06-30	2011-08-21
	2011-05-09	2011-05-30	2011-07-03	2011-08-21
	2011-05-09	2011-05-29	2011-07-02	2011-08-21
	2011-05-09	2011-05-30	2011-07-03	2011-08-21
	2011-05-09	2011-05-30	2011-07-03	2011-08-23
	2011-05-09	2011-05-30	2011-07-03	2011-08-21
	2011-05-09	2011-05-31	2011-06-30	2011-08-21
	2011-05-09	2011-05-30	2011-06-30	2011-08-21
	2011-05-09	2011-05-31	2011-07-03	2011-08-21
	2011-05-09	2011-05-30	2011-06-30	2011-08-23
	2011-05-09	2011-05-31	2011-06-30	2011-08-21
	2011-05-09	2011-05-31	2011-06-30	2011-08-23
	2011-05-09	2011-05-30	2011-07-03	2011-08-21
	2011-05-09	2011-05-29	2011-07-02	2011-08-21
	2011-05-09	2011-05-29	2011-07-03	2011-08-21
	2011-05-09	2011-05-29	2011-06-30	2011-08-21
	2011-05-09	2011-05-29	2011-07-03	2011-08-21
	2011-05-09	2011-05-30	2011-06-30	2011-08-21
	2011-05-09	2011-05-30	2011-06-30	2011-08-21
Ha 6223-4	2011-05-09	2011-05-29	2011-06-30	2011-08-21
	2011-05-09	2011-05-29	2011-07-01	2011-08-22
	2011-05-09	2011-05-28	2011-07-02	2011-08-22
	2011-05-09	2011-05-28	2011-07-01	2011-08-22
	2011-05-09	2011-05-29	2011-07-01	2011-08-22
	2011-05-09	2011-05-30	2011-07-02	2011-08-22
	2011-05-09	2011-05-30	2011-07-01	2011-08-21
	2011-05-09	2011-05-29	2011-07-01	2011-08-21
	2011-05-09	2011-05-30	2011-07-02	2011-08-21
	2011-05-09	2011-05-29	2011-07-03	2011-08-21
	2011-05-09	2011-05-30	2011-06-30	2011-08-21
	2011-05-09	2011-05-30	2011-06-29	2011-08-21
	2011-05-09	2011-05-28	2011-07-02	2011-08-21
	2011-05-09	2011-05-28	2011-07-02	2011-08-21
	2011-05-09	2011-05-30	2011-07-02	2011-08-21
	2011-05-09	2011-05-30	2011-07-02	2011-08-21
	2011-05-09	2011-05-28	2011-07-01	2011-08-21
	2011-05-09	2011-05-29	2011-07-02	2011-08-21
	2011-05-09	2011-05-28	2011-07-02	2011-08-21
	2011-05-09	2011-05-29	2011-06-29	2011-08-21
	2011-05-09	2011-05-28	2011-07-01	2011-08-21
	2011-05-09	2011-05-29	2011-07-02	2011-08-21
	2011-05-09	2011-05-28	2011-07-01	2011-08-21
	2011-05-09	2011-05-28	2011-07-02	2011-08-21
	2011-05-09	2011-05-29	2011-07-01	2011-08-21
	2011-05-09	2011-05-29	2011-06-30	2011-08-22
	2011-05-09	2011-05-28	2011-06-30	2011-08-21
	2011-05-09	2011-05-28	2011-07-01	2011-08-22
	2011-05-09	2011-05-29	2011-06-29	2011-08-21
	2011-05-09	2011-05-30	2011-07-02	2011-08-21
Heihe 20	2011-05-09	2011-05-28	2011-06-30	2011-08-24
	2011-05-09	2011-05-28	2011-06-30	2011-08-23
	2011-05-09	2011-05-28	2011-06-30	2011-08-24
	2011-05-09	2011-05-30	2011-06-30	2011-08-24
	2011-05-09	2011-05-30	2011-06-30	2011-08-24
	2011-05-09	2011-05-28	2011-06-30	2011-08-24
	2011-05-09	2011-05-29	2011-06-30	2011-08-24
	2011-05-09	2011-05-28	2011-06-30	2011-08-24
	2011-05-09	2011-05-30	2011-06-30	2011-08-24
	2011-05-09	2011-05-29	2011-06-30	2011-08-24
	2011-05-09	2011-05-30	2011-07-01	2011-08-24
	2011-05-09	2011-05-28	2011-07-01	2011-08-24
	2011-05-09	2011-05-28	2011-06-30	2011-08-24
	2011-05-09	2011-05-28	2011-07-01	2011-08-24
	2011-05-09	2011-05-28	2011-07-03	2011-08-24
	2011-05-09	2011-05-30	2011-06-30	2011-08-24
	2011-05-09	2011-05-30	2011-06-30	2011-08-23
	2011-05-09	2011-05-29	2011-07-01	2011-08-24
	2011-05-09	2011-05-30	2011-07-01	2011-08-24
	2011-05-09	2011-05-28	2011-06-30	2011-08-24
	2011-05-09	2011-05-30	2011-06-30	2011-08-24
	2011-05-09	2011-05-30	2011-06-30	2011-08-24
	2011-05-09	2011-05-30	2011-06-30	2011-08-24
	2011-05-09	2011-05-30	2011-06-30	2011-08-24
	2011-05-09	2011-05-28	2011-06-30	2011-08-24
	2011-05-09	2011-05-28	2011-06-30	2011-08-24
	2011-05-09	2011-05-30	2011-06-30	2011-08-24
	2011-05-09	2011-05-31	2011-06-30	2011-08-24
	2011-05-09	2011-05-31	2011-07-01	2011-08-24
	2011-05-09	2011-05-28	2011-06-30	2011-08-24
Heihe 28	2011-05-09	2011-05-30	2011-07-03	2011-08-24
	2011-05-09	2011-05-30	2011-07-04	2011-08-23
	2011-05-09	2011-05-30	2011-07-03	2011-08-23
	2011-05-09	2011-05-29	2011-07-04	2011-08-22
	2011-05-09	2011-05-30	2011-07-03	2011-08-23
	2011-05-09	2011-05-29	2011-06-30	2011-08-23
	2011-05-09	2011-05-30	2011-07-03	2011-08-22
	2011-05-09	2011-05-30	2011-07-03	2011-08-23
	2011-05-09	2011-05-30	2011-07-03	2011-08-22
	2011-05-09	2011-05-30	2011-07-03	2011-08-23
	2011-05-09	2011-05-29	2011-07-03	2011-08-22
	2011-05-09	2011-05-29	2011-07-03	2011-08-22
	2011-05-09	2011-05-29	2011-07-03	2011-08-22
	2011-05-09	2011-05-29	2011-07-04	2011-08-23
	2011-05-09	2011-05-29	2011-07-03	2011-08-23
	2011-05-09	2011-05-29	2011-07-05	2011-08-23
	2011-05-09	2011-05-29	2011-07-03	2011-08-24
	2011-05-09	2011-05-29	2011-06-30	2011-08-23
	2011-05-09	2011-05-30	2011-07-03	2011-08-24
	2011-05-09	2011-05-29	2011-06-30	2011-08-23
	2011-05-09	2011-05-30	2011-07-03	2011-08-24
	2011-05-09	2011-05-29	2011-07-02	2011-08-23
	2011-05-09	2011-05-29	2011-07-05	2011-08-24
	2011-05-09	2011-05-29	2011-07-03	2011-08-23
	2011-05-09	2011-05-30	2011-07-02	2011-08-24
	2011-05-09	2011-05-30	2011-07-04	2011-08-23
	2011-05-09	2011-05-29	2011-07-03	2011-08-23
	2011-05-09	2011-05-30	2011-07-03	2011-08-22
	2011-05-09	2011-05-29	2011-07-03	2011-08-23
	2011-05-09	2011-05-29	2011-06-30	2011-08-23
Heihe 12	2011-05-09	2011-05-30	2011-07-04	2011-08-22
	2011-05-09	2011-05-30	2011-07-05	2011-08-22
	2011-05-09	2011-05-29	2011-07-04	2011-08-20
	2011-05-09	2011-05-30	2011-07-04	2011-08-22
	2011-05-09	2011-05-31	2011-07-04	2011-08-25
	2011-05-09	2011-05-29	2011-07-05	2011-08-23
	2011-05-09	2011-05-30	2011-07-03	2011-08-23
	2011-05-09	2011-05-30	2011-07-04	2011-08-25
	2011-05-09	2011-05-29	2011-07-04	2011-08-25
	2011-05-09	2011-05-29	2011-07-03	2011-08-23
	2011-05-09	2011-05-29	2011-07-05	2011-08-23
	2011-05-09	2011-05-30	2011-07-03	2011-08-24
	2011-05-09	2011-05-30	2011-07-04	2011-08-25
	2011-05-09	2011-05-30	2011-07-03	2011-08-25
	2011-05-09	2011-05-29	2011-07-03	2011-08-25
	2011-05-09	2011-05-29	2011-07-04	2011-08-20
	2011-05-09	2011-05-29	2011-07-03	2011-08-22
	2011-05-09	2011-05-29	2011-07-03	2011-08-22
	2011-05-09	2011-05-30	2011-07-03	2011-08-22
	2011-05-09	2011-05-29	2011-07-04	2011-08-23
	2011-05-09	2011-05-30	2011-07-04	2011-08-23
	2011-05-09	2011-05-29	2011-07-05	2011-08-25
	2011-05-09	2011-05-30	2011-07-04	2011-08-23
	2011-05-09	2011-05-29	2011-07-05	2011-08-23
	2011-05-09	2011-05-29	2011-07-04	2011-08-23
	2011-05-09	2011-05-29	2011-07-03	2011-08-25
	2011-05-09	2011-05-30	2011-07-04	2011-08-25
	2011-05-09	2011-05-29	2011-07-05	2011-08-25
	2011-05-09	2011-05-30	2011-07-05	2011-08-25
	2011-05-09	2011-05-30	2011-07-04	2011-08-25
Heihe 8	2011-05-09	2011-05-29	2011-07-03	2011-08-28
	2011-05-09	2011-05-30	2011-07-04	2011-08-28
	2011-05-09	2011-05-29	2011-07-03	2011-08-28
	2011-05-09	2011-05-29	2011-07-03	2011-08-28
	2011-05-09	2011-05-29	2011-07-02	2011-08-28
	2011-05-09	2011-05-29	2011-07-02	2011-08-28
	2011-05-09	2011-05-30	2011-07-03	2011-08-28
	2011-05-09	2011-05-29	2011-07-03	2011-08-28
	2011-05-09	2011-05-29	2011-07-03	2011-08-28
	2011-05-09	2011-05-29	2011-06-30	2011-08-28
	2011-05-09	2011-05-29	2011-07-03	2011-08-28
	2011-05-09	2011-05-30	2011-07-02	2011-08-28
	2011-05-09	2011-05-28	2011-07-03	2011-08-28
	2011-05-09	2011-05-29	2011-07-03	2011-08-28
	2011-05-09	2011-05-30	2011-07-03	2011-08-28
	2011-05-09	2011-05-29	2011-07-04	2011-08-29
	2011-05-09	2011-05-29	2011-07-03	2011-08-28
	2011-05-09	2011-05-29	2011-07-04	2011-08-28
	2011-05-09	2011-05-29	2011-07-02	2011-08-28
	2011-05-09	2011-05-30	2011-07-04	2011-08-28
	2011-05-09	2011-05-30	2011-07-03	2011-08-28
	2011-05-09	2011-05-29	2011-07-03	2011-08-27
	2011-05-09	2011-05-29	2011-06-30	2011-08-28
	2011-05-09	2011-05-28	2011-07-04	2011-08-27
	2011-05-09	2011-05-30	2011-07-03	2011-08-28
	2011-05-09	2011-05-30	2011-07-04	2011-08-29
	2011-05-09	2011-05-28	2011-07-03	2011-08-28
	2011-05-09	2011-05-30	2011-07-04	2011-08-28
	2011-05-09	2011-05-29	2011-07-04	2011-08-28
	2011-05-09	2011-05-29	2011-07-04	2011-08-28
Dongnong 40	2011-05-09	2011-05-30	2011-07-08	2011-09-05
	2011-05-09	2011-05-29	2011-07-08	2011-09-04
	2011-05-09	2011-05-28	2011-07-07	2011-09-04
	2011-05-09	2011-05-30	2011-07-08	2011-09-05
	2011-05-09	2011-05-29	2011-07-05	2011-09-04
	2011-05-09	2011-05-28	2011-07-07	2011-09-05
	2011-05-09	2011-05-30	2011-07-08	2011-09-05
	2011-05-09	2011-05-30	2011-07-08	2011-09-05
	2011-05-09	2011-05-29	2011-07-08	2011-09-04
	2011-05-09	2011-05-29	2011-07-08	2011-09-04
	2011-05-09	2011-05-30	2011-07-08	2011-09-05
	2011-05-09	2011-05-30	2011-07-09	2011-09-04
	2011-05-09	2011-05-31	2011-07-08	2011-09-04
	2011-05-09	2011-05-29	2011-07-06	2011-09-05
	2011-05-09	2011-05-29	2011-07-08	2011-09-05
	2011-05-09	2011-05-30	2011-07-09	2011-09-05
	2011-05-09	2011-05-29	2011-07-08	2011-09-05
	2011-05-09	2011-05-30	2011-07-05	2011-09-05
	2011-05-09	2011-05-29	2011-07-05	2011-09-04
	2011-05-09	2011-05-29	2011-07-06	2011-09-05
	2011-05-09	2011-05-30	2011-07-08	2011-09-05
	2011-05-09	2011-05-30	2011-07-09	2011-09-05
	2011-05-09	2011-05-29	2011-07-09	2011-09-05
	2011-05-09	2011-05-29	2011-07-06	2011-09-05
	2011-05-09	2011-05-30	2011-07-09	2011-09-05
	2011-05-09	2011-05-30	2011-07-09	2011-09-04
	2011-05-09	2011-05-29	2011-07-08	2011-09-04
	2011-05-09	2011-05-30	2011-07-08	2011-09-05
	2011-05-09	2011-05-30	2011-07-09	2011-09-04
	2011-05-09	2011-05-29	2011-07-06	2011-09-05
Mengdou 7	2011-05-09	2011-05-29	2011-07-03	2011-08-26
	2011-05-09	2011-05-28	2011-07-04	2011-08-26
	2011-05-09	2011-05-29	2011-07-04	2011-08-26
	2011-05-09	2011-05-28	2011-07-04	2011-08-26
	2011-05-09	2011-05-28	2011-07-06	2011-08-26
	2011-05-09	2011-05-30	2011-07-04	2011-08-26
	2011-05-09	2011-05-29	2011-07-04	2011-08-26
	2011-05-09	2011-05-30	2011-07-04	2011-08-26
	2011-05-09	2011-05-28	2011-07-04	2011-08-26
	2011-05-09	2011-05-28	2011-07-04	2011-08-26
	2011-05-09	2011-05-29	2011-07-05	2011-08-26
	2011-05-09	2011-05-30	2011-07-06	2011-08-26
	2011-05-09	2011-05-30	2011-07-06	2011-08-26
	2011-05-09	2011-05-30	2011-07-03	2011-08-26
	2011-05-09	2011-05-30	2011-07-02	2011-08-26
	2011-05-09	2011-05-30	2011-07-03	2011-08-26
	2011-05-09	2011-05-31	2011-07-05	2011-08-26
	2011-05-09	2011-05-31	2011-07-02	2011-08-26
	2011-05-09	2011-05-30	2011-07-02	2011-08-26
	2011-05-09	2011-05-30	2011-07-02	2011-08-26
	2011-05-09	2011-05-30	2011-07-05	2011-08-26
	2011-05-09	2011-05-31	2011-07-06	2011-08-26
	2011-05-09	2011-05-31	2011-07-06	2011-08-26
	2011-05-09	2011-05-30	2011-07-04	2011-08-26
	2011-05-09	2011-05-30	2011-07-05	2011-08-26
	2011-05-09	2011-05-30	2011-07-04	2011-08-26
	2011-05-09	2011-05-29	2011-07-05	2011-08-26
	2011-05-09	2011-05-29	2011-07-04	2011-08-26
	2011-05-09	2011-05-29	2011-07-02	2011-08-26
	2011-05-09	2011-05-29	2011-07-04	2011-08-26
Heihe 33	2011-05-09	2011-05-28	2011-07-03	2011-08-28
	2011-05-09	2011-05-29	2011-07-02	2011-08-27
	2011-05-09	2011-05-30	2011-07-04	2011-08-27
	2011-05-09	2011-05-29	2011-07-02	2011-08-27
	2011-05-09	2011-05-29	2011-07-04	2011-08-27
	2011-05-09	2011-05-29	2011-07-04	2011-08-27
	2011-05-09	2011-05-30	2011-07-04	2011-08-27
	2011-05-09	2011-05-29	2011-07-03	2011-08-27
	2011-05-09	2011-05-31	2011-07-02	2011-08-27
	2011-05-09	2011-05-30	2011-07-04	2011-08-27
	2011-05-09	2011-05-31	2011-07-05	2011-08-27
	2011-05-09	2011-05-29	2011-07-04	2011-08-27
	2011-05-09	2011-05-29	2011-07-07	2011-08-27
	2011-05-09	2011-05-29	2011-07-02	2011-08-27
	2011-05-09	2011-05-31	2011-07-06	2011-08-27
	2011-05-09	2011-05-30	2011-07-04	2011-08-27
	2011-05-09	2011-05-30	2011-07-06	2011-08-27
	2011-05-09	2011-05-30	2011-07-06	2011-08-27
	2011-05-09	2011-05-30	2011-07-03	2011-08-27
	2011-05-09	2011-05-30	2011-07-03	2011-08-27
	2011-05-09	2011-05-28	2011-07-05	2011-08-27
	2011-05-09	2011-05-28	2011-07-03	2011-08-27
	2011-05-09	2011-05-28	2011-07-03	2011-08-27
	2011-05-09	2011-05-28	2011-07-04	2011-08-27
	2011-05-09	2011-05-28	2011-07-04	2011-08-27
	2011-05-09	2011-05-31	2011-07-06	2011-08-27
	2011-05-09	2011-05-30	2011-07-04	2011-08-27
	2011-05-09	2011-05-29	2011-07-04	2011-08-27
	2011-05-09	2011-05-30	2011-07-04	2011-08-27
	2011-05-09	2011-05-31	2011-07-04	2011-08-27
Beifeng 1	2011-05-09	2011-05-30	2011-07-02	2011-08-28
	2011-05-09	2011-05-30	2011-07-02	2011-08-28
	2011-05-09	2011-05-30	2011-07-03	2011-08-28
	2011-05-09	2011-05-30	2011-07-02	2011-08-28
	2011-05-09	2011-05-30	2011-07-02	2011-08-28
	2011-05-09	2011-05-28	2011-07-02	2011-08-28
	2011-05-09	2011-05-30	2011-07-02	2011-08-28
	2011-05-09	2011-05-30	2011-07-02	2011-08-28
	2011-05-09	2011-05-28	2011-07-03	2011-08-28
	2011-05-09	2011-05-30	2011-07-04	2011-08-28
	2011-05-09	2011-05-30	2011-07-02	2011-08-28
	2011-05-09	2011-05-29	2011-07-02	2011-08-28
	2011-05-09	2011-05-29	2011-07-04	2011-08-28
	2011-05-09	2011-05-29	2011-07-02	2011-08-28
	2011-05-09	2011-05-30	2011-07-02	2011-08-28
	2011-05-09	2011-05-30	2011-07-03	2011-08-28
	2011-05-09	2011-05-30	2011-07-02	2011-08-28
	2011-05-09	2011-05-29	2011-07-03	2011-08-28
	2011-05-09	2011-05-29	2011-07-05	2011-08-28
	2011-05-09	2011-05-30	2011-07-04	2011-08-28
	2011-05-09	2011-05-30	2011-07-02	2011-08-28
	2011-05-09	2011-05-28	2011-07-02	2011-08-28
	2011-05-09	2011-05-30	2011-07-02	2011-08-28
	2011-05-09	2011-05-30	2011-07-03	2011-08-28
	2011-05-09	2011-05-30	2011-07-04	2011-08-28
	2011-05-09	2011-05-30	2011-07-03	2011-08-28
	2011-05-09	2011-05-29	2011-07-04	2011-08-28
	2011-05-09	2011-05-30	2011-07-03	2011-08-28
	2011-05-09	2011-05-29	2011-07-02	2011-08-28
	2011-05-09	2011-05-29	2011-07-02	2011-08-28
Beidou 24	2011-05-09	2011-05-30	2011-07-07	2011-09-05
	2011-05-09	2011-05-30	2011-07-07	2011-09-05
	2011-05-09	2011-05-31	2011-07-07	2011-09-06
	2011-05-09	2011-05-28	2011-07-05	2011-09-06
	2011-05-09	2011-05-30	2011-07-07	2011-09-06
	2011-05-09	2011-05-30	2011-07-07	2011-09-06
	2011-05-09	2011-05-30	2011-07-07	2011-09-06
	2011-05-09	2011-05-30	2011-07-07	2011-09-05
	2011-05-09	2011-05-30	2011-07-06	2011-09-05
	2011-05-09	2011-05-30	2011-07-05	2011-09-06
	2011-05-09	2011-05-30	2011-07-05	2011-09-06
	2011-05-09	2011-05-30	2011-07-05	2011-09-06
	2011-05-09	2011-05-29	2011-07-05	2011-09-06
	2011-05-09	2011-05-29	2011-07-04	2011-09-06
	2011-05-09	2011-05-29	2011-07-07	2011-09-06
	2011-05-09	2011-05-30	2011-07-04	2011-09-06
	2011-05-09	2011-05-30	2011-07-04	2011-09-06
	2011-05-09	2011-05-31	2011-07-04	2011-09-06
	2011-05-09	2011-05-30	2011-07-08	2011-09-06
	2011-05-09	2011-05-30	2011-07-07	2011-09-06
	2011-05-09	2011-05-30	2011-07-04	2011-09-05
	2011-05-09	2011-05-29	2011-07-04	2011-09-06
	2011-05-09	2011-05-29	2011-07-04	2011-09-06
	2011-05-09	2011-05-30	2011-07-07	2011-09-06
	2011-05-09	2011-05-31	2011-07-06	2011-09-06
	2011-05-09	2011-05-31	2011-07-04	2011-09-06
	2011-05-09	2011-05-30	2011-07-07	2011-09-06
	2011-05-09	2011-05-29	2011-07-04	2011-09-05
	2011-05-09	2011-05-29	2011-07-04	2011-09-05
	2011-05-09	2011-05-29	2011-07-01	2011-09-05
Beidou 37	2011-05-09	2011-05-30	2011-07-08	2011-09-17
	2011-05-09	2011-05-30	2011-07-08	2011-09-17
	2011-05-09	2011-05-31	2011-07-08	2011-09-17
	2011-05-09	2011-05-28	2011-07-07	2011-09-17
	2011-05-09	2011-05-30	2011-07-07	2011-09-17
	2011-05-09	2011-05-30	2011-07-07	2011-09-17
	2011-05-09	2011-05-30	2011-07-08	2011-09-17
	2011-05-09	2011-05-30	2011-07-08	2011-09-17
	2011-05-09	2011-05-30	2011-07-08	2011-09-16
	2011-05-09	2011-05-30	2011-07-08	2011-09-16
	2011-05-09	2011-05-30	2011-07-08	2011-09-16
	2011-05-09	2011-05-30	2011-07-08	2011-09-17
	2011-05-09	2011-05-29	2011-07-08	2011-09-16
	2011-05-09	2011-05-29	2011-07-09	2011-09-17
	2011-05-09	2011-05-29	2011-07-08	2011-09-17
	2011-05-09	2011-05-30	2011-07-08	2011-09-17
	2011-05-09	2011-05-31	2011-07-08	2011-09-17
	2011-05-09	2011-05-31	2011-07-09	2011-09-17
	2011-05-09	2011-05-29	2011-07-09	2011-09-17
	2011-05-09	2011-05-30	2011-07-08	2011-09-17
	2011-05-09	2011-05-29	2011-07-07	2011-09-17
	2011-05-09	2011-05-30	2011-07-08	2011-09-17
	2011-05-09	2011-05-29	2011-07-07	2011-09-17
	2011-05-09	2011-05-30	2011-07-07	2011-09-17
	2011-05-09	2011-05-31	2011-07-07	2011-09-18
	2011-05-09	2011-05-30	2011-07-07	2011-09-17
	2011-05-09	2011-05-30	2011-07-08	2011-09-17
	2011-05-09	2011-05-30	2011-07-08	2011-09-18
	2011-05-09	2011-05-30	2011-07-08	2011-09-17
	2011-05-09	2011-05-29	2011-07-08	2011-09-17
Heihe 7	2011-05-09	2011-05-30	2011-07-04	2011-09-04
	2011-05-09	2011-05-30	2011-07-03	2011-09-04
	2011-05-09	2011-05-29	2011-07-02	2011-09-04
	2011-05-09	2011-05-30	2011-07-04	2011-09-03
	2011-05-09	2011-05-30	2011-07-03	2011-09-03
	2011-05-09	2011-05-29	2011-07-04	2011-09-04
	2011-05-09	2011-05-30	2011-07-04	2011-09-04
	2011-05-09	2011-05-30	2011-07-04	2011-09-04
	2011-05-09	2011-05-30	2011-07-04	2011-09-04
	2011-05-09	2011-05-30	2011-07-05	2011-09-04
	2011-05-09	2011-05-29	2011-07-03	2011-09-04
	2011-05-09	2011-05-31	2011-07-05	2011-09-04
	2011-05-09	2011-05-30	2011-07-05	2011-09-04
	2011-05-09	2011-05-29	2011-07-04	2011-09-04
	2011-05-09	2011-05-29	2011-07-05	2011-09-04
	2011-05-09	2011-05-30	2011-07-04	2011-09-04
	2011-05-09	2011-05-31	2011-07-05	2011-09-04
	2011-05-09	2011-05-31	2011-07-05	2011-09-04
	2011-05-09	2011-05-29	2011-07-05	2011-09-04
	2011-05-09	2011-05-30	2011-07-04	2011-09-04
	2011-05-09	2011-05-29	2011-07-05	2011-09-04
	2011-05-09	2011-05-30	2011-07-04	2011-09-03
	2011-05-09	2011-05-29	2011-07-07	2011-09-04
	2011-05-09	2011-05-30	2011-07-05	2011-09-03
	2011-05-09	2011-05-31	2011-07-02	2011-09-03
	2011-05-09	2011-05-30	2011-07-02	2011-09-04
	2011-05-09	2011-05-30	2011-07-05	2011-09-04
	2011-05-09	2011-05-30	2011-07-05	2011-09-04
	2011-05-09	2011-05-30	2011-07-04	2011-09-04
	2011-05-09	2011-05-29	2011-07-05	2011-09-04
Heihe 11	2011-05-09	2011-05-30	2011-07-02	2011-08-24
	2011-05-09	2011-05-31	2011-07-01	2011-08-24
	2011-05-09	2011-05-29	2011-07-01	2011-08-24
	2011-05-09	2011-05-30	2011-07-02	2011-08-24
	2011-05-09	2011-05-30	2011-07-01	2011-08-24
	2011-05-09	2011-05-30	2011-07-03	2011-08-24
	2011-05-09	2011-05-30	2011-07-01	2011-08-24
	2011-05-09	2011-05-29	2011-07-01	2011-08-24
	2011-05-09	2011-05-30	2011-07-01	2011-08-23
	2011-05-09	2011-05-29	2011-07-02	2011-08-23
	2011-05-09	2011-05-29	2011-07-01	2011-08-22
	2011-05-09	2011-06-01	2011-07-01	2011-08-22
	2011-05-09	2011-05-31	2011-07-02	2011-08-22
	2011-05-09	2011-05-30	2011-07-01	2011-08-22
	2011-05-09	2011-06-01	2011-06-30	2011-08-22
	2011-05-09	2011-05-30	2011-07-01	2011-08-23
	2011-05-09	2011-05-30	2011-07-02	2011-08-23
	2011-05-09	2011-05-30	2011-07-01	2011-08-23
	2011-05-09	2011-05-29	2011-07-02	2011-08-23
	2011-05-09	2011-05-29	2011-07-02	2011-08-23
	2011-05-09	2011-05-30	2011-07-02	2011-08-23
	2011-05-09	2011-05-30	2011-07-01	2011-08-23
	2011-05-09	2011-05-29	2011-07-01	2011-08-23
	2011-05-09	2011-06-01	2011-07-01	2011-08-23
	2011-05-09	2011-05-31	2011-07-02	2011-08-23
	2011-05-09	2011-05-30	2011-07-02	2011-08-23
	2011-05-09	2011-06-01	2011-07-02	2011-08-23
	2011-05-09	2011-05-30	2011-07-02	2011-08-23
	2011-05-09	2011-05-30	2011-07-02	2011-08-23
	2011-05-09	2011-05-30	2011-07-01	2011-08-23
Hefeng 37	2011-05-09	2011-05-29	2011-07-01	2011-09-01
	2011-05-09	2011-05-29	2011-07-02	2011-09-01
	2011-05-09	2011-05-30	2011-07-02	2011-09-01
	2011-05-09	2011-05-30	2011-07-02	2011-09-01
	2011-05-09	2011-05-30	2011-07-03	2011-09-01
	2011-05-09	2011-05-30	2011-07-02	2011-08-31
	2011-05-09	2011-05-31	2011-07-02	2011-09-01
	2011-05-09	2011-05-30	2011-07-04	2011-08-31
	2011-05-09	2011-05-31	2011-07-02	2011-09-01
	2011-05-09	2011-05-31	2011-07-02	2011-09-01
	2011-05-09	2011-05-31	2011-07-02	2011-09-01
	2011-05-09	2011-05-31	2011-07-02	2011-09-01
	2011-05-09	2011-05-31	2011-07-04	2011-09-01
	2011-05-09	2011-05-30	2011-07-04	2011-08-31
	2011-05-09	2011-05-29	2011-07-02	2011-08-31
	2011-05-09	2011-05-30	2011-07-02	2011-09-01
	2011-05-09	2011-05-30	2011-07-03	2011-09-01
	2011-05-09	2011-05-29	2011-07-04	2011-09-01
	2011-05-09	2011-05-30	2011-07-02	2011-09-01
	2011-05-09	2011-05-30	2011-07-04	2011-09-01
	2011-05-09	2011-05-30	2011-06-30	2011-09-01
	2011-05-09	2011-05-30	2011-07-02	2011-08-31
	2011-05-09	2011-05-29	2011-06-30	2011-08-31
	2011-05-09	2011-05-29	2011-07-02	2011-08-31
	2011-05-09	2011-05-29	2011-07-02	2011-08-31
	2011-05-09	2011-05-30	2011-07-02	2011-09-01
	2011-05-09	2011-05-31	2011-07-02	2011-09-02
	2011-05-09	2011-05-30	2011-07-03	2011-09-03
	2011-05-09	2011-05-30	2011-07-05	2011-09-01
	2011-05-09	2011-05-30	2011-07-02	2011-09-01
Beidou 16	2011-05-09	2011-05-31	2011-07-03	2011-08-31
	2011-05-09	2011-05-31	2011-07-04	2011-08-31
	2011-05-09	2011-06-01	2011-07-04	2011-08-31
	2011-05-09	2011-05-31	2011-07-06	2011-08-31
	2011-05-09	2011-06-01	2011-07-05	2011-08-31
	2011-05-09	2011-05-30	2011-07-03	2011-08-31
	2011-05-09	2011-05-29	2011-07-02	2011-08-31
	2011-05-09	2011-05-29	2011-07-05	2011-08-31
	2011-05-09	2011-05-29	2011-07-05	2011-08-31
	2011-05-09	2011-05-31	2011-07-05	2011-08-31
	2011-05-09	2011-05-31	2011-07-05	2011-08-31
	2011-05-09	2011-05-30	2011-07-03	2011-08-31
	2011-05-09	2011-05-30	2011-07-04	2011-08-31
	2011-05-09	2011-05-29	2011-07-02	2011-08-31
	2011-05-09	2011-05-31	2011-07-03	2011-08-31
	2011-05-09	2011-05-29	2011-07-05	2011-08-31
	2011-05-09	2011-05-29	2011-07-02	2011-08-31
	2011-05-09	2011-05-30	2011-07-05	2011-08-31
	2011-05-09	2011-05-31	2011-07-02	2011-08-30
	2011-05-09	2011-05-30	2011-07-02	2011-08-30
	2011-05-09	2011-05-30	2011-07-05	2011-08-29
	2011-05-09	2011-05-30	2011-07-02	2011-08-30
	2011-05-09	2011-05-30	2011-07-05	2011-08-30
	2011-05-09	2011-05-29	2011-07-05	2011-08-30
	2011-05-09	2011-06-01	2011-07-05	2011-08-30
	2011-05-09	2011-06-01	2011-07-05	2011-08-30
	2011-05-09	2011-05-31	2011-07-05	2011-08-30
	2011-05-09	2011-05-31	2011-07-02	2011-08-30
	2011-05-09	2011-05-29	2011-07-02	2011-08-30
	2011-05-09	2011-05-29	2011-07-05	2011-08-30
Bei 02-7495	2011-05-09	2011-05-31	2011-07-04	2011-08-30
	2011-05-09	2011-05-31	2011-07-02	2011-08-30
	2011-05-09	2011-05-30	2011-07-05	2011-08-30
	2011-05-09	2011-05-29	2011-07-04	2011-08-30
	2011-05-09	2011-05-31	2011-07-03	2011-08-31
	2011-05-09	2011-05-31	2011-07-06	2011-08-30
	2011-05-09	2011-05-31	2011-07-03	2011-08-30
	2011-05-09	2011-05-31	2011-07-04	2011-08-31
	2011-05-09	2011-05-30	2011-07-05	2011-08-31
	2011-05-09	2011-05-29	2011-07-04	2011-08-31
	2011-05-09	2011-05-29	2011-07-04	2011-08-31
	2011-05-09	2011-05-31	2011-07-04	2011-08-31
	2011-05-09	2011-05-29	2011-07-04	2011-08-31
	2011-05-09	2011-05-30	2011-07-04	2011-08-31
	2011-05-09	2011-05-31	2011-07-05	2011-08-30
	2011-05-09	2011-05-31	2011-07-06	2011-08-29
	2011-05-09	2011-05-30	2011-07-07	2011-08-30
	2011-05-09	2011-05-30	2011-07-06	2011-08-30
	2011-05-09	2011-05-30	2011-07-06	2011-08-30
	2011-05-09	2011-05-31	2011-07-06	2011-08-30
	2011-05-09	2011-05-30	2011-07-03	2011-08-30
	2011-05-09	2011-05-30	2011-07-03	2011-08-30
	2011-05-09	2011-05-30	2011-07-04	2011-08-30
	2011-05-09	2011-05-31	2011-07-05	2011-08-30
	2011-05-09	2011-05-29	2011-07-05	2011-08-30
	2011-05-09	2011-05-30	2011-07-05	2011-08-30
	2011-05-09	2011-05-29	2011-07-05	2011-08-30
	2011-05-09	2011-05-29	2011-07-04	2011-08-30
	2011-05-09	2011-05-31	2011-07-03	2011-08-30
	2011-05-09	2011-05-31	2011-07-06	2011-08-30
Fengshou 23	2011-05-09	2011-06-01	2011-07-05	2011-08-31
	2011-05-09	2011-06-01	2011-07-03	2011-08-31
	2011-05-09	2011-06-01	2011-07-04	2011-08-31
	2011-05-09	2011-06-02	2011-07-05	2011-08-31
	2011-05-09	2011-06-01	2011-07-05	2011-08-31
	2011-05-09	2011-06-02	2011-07-04	2011-08-31
	2011-05-09	2011-06-01	2011-07-05	2011-08-31
	2011-05-09	2011-06-01	2011-07-05	2011-08-31
	2011-05-09	2011-06-01	2011-07-05	2011-08-31
	2011-05-09	2011-05-31	2011-07-05	2011-08-31
	2011-05-09	2011-06-01	2011-07-05	2011-08-31
	2011-05-09	2011-05-31	2011-07-05	2011-08-31
	2011-05-09	2011-06-01	2011-07-06	2011-09-01
	2011-05-09	2011-06-01	2011-07-06	2011-08-31
	2011-05-09	2011-06-01	2011-07-05	2011-09-01
	2011-05-09	2011-06-01	2011-07-06	2011-09-01
	2011-05-09	2011-06-01	2011-07-04	2011-09-01
	2011-05-09	2011-06-01	2011-07-05	2011-09-01
	2011-05-09	2011-06-01	2011-07-05	2011-09-01
	2011-05-09	2011-06-01	2011-07-05	2011-09-01
	2011-05-09	2011-06-01	2011-07-05	2011-09-01
	2011-05-09	2011-06-01	2011-07-05	2011-09-01
	2011-05-09	2011-06-01	2011-07-05	2011-09-01
	2011-05-09	2011-05-31	2011-07-06	2011-08-31
	2011-05-09	2011-06-01	2011-07-03	2011-08-31
	2011-05-09	2011-06-01	2011-07-05	2011-08-31
	2011-05-09	2011-06-01	2011-07-06	2011-08-31
	2011-05-09	2011-06-02	2011-07-05	2011-08-31
	2011-05-09	2011-06-01	2011-07-05	2011-08-31
	2011-05-09	2011-06-01	2011-07-05	2011-08-31
Heihe 3	2011-05-09	2011-06-01	2011-07-02	2011-09-06
	2011-05-09	2011-06-01	2011-07-03	2011-09-06
	2011-05-09	2011-05-30	2011-07-02	2011-09-06
	2011-05-09	2011-06-01	2011-07-03	2011-09-06
	2011-05-09	2011-06-01	2011-07-02	2011-09-06
	2011-05-09	2011-06-01	2011-07-03	2011-09-06
	2011-05-09	2011-05-30	2011-07-06	2011-09-06
	2011-05-09	2011-05-30	2011-07-05	2011-09-06
	2011-05-09	2011-06-01	2011-07-04	2011-09-06
	2011-05-09	2011-06-01	2011-07-03	2011-09-06
	2011-05-09	2011-05-31	2011-07-06	2011-09-06
	2011-05-09	2011-05-31	2011-07-03	2011-09-06
	2011-05-09	2011-06-01	2011-07-06	2011-09-06
	2011-05-09	2011-05-31	2011-07-03	2011-09-06
	2011-05-09	2011-05-31	2011-07-06	2011-09-06
	2011-05-09	2011-05-30	2011-07-02	2011-09-06
	2011-05-09	2011-06-02	2011-07-03	2011-09-06
	2011-05-09	2011-06-01	2011-07-04	2011-09-06
	2011-05-09	2011-05-30	2011-07-02	2011-09-06
	2011-05-09	2011-06-01	2011-07-02	2011-09-06
	2011-05-09	2011-06-01	2011-07-03	2011-09-06
	2011-05-09	2011-06-01	2011-07-03	2011-09-06
	2011-05-09	2011-06-01	2011-07-07	2011-09-06
	2011-05-09	2011-05-30	2011-07-03	2011-09-06
	2011-05-09	2011-05-30	2011-07-03	2011-09-06
	2011-05-09	2011-05-31	2011-07-03	2011-09-06
	2011-05-09	2011-05-31	2011-07-07	2011-09-06
	2011-05-09	2011-05-31	2011-07-03	2011-09-06
	2011-05-09	2011-05-31	2011-07-07	2011-09-06
	2011-05-09	2011-05-30	2011-07-04	2011-09-06
Heihe 37	2011-05-09	2011-05-31	2011-07-02	2011-09-01
	2011-05-09	2011-05-31	2011-07-04	2011-09-01
	2011-05-09	2011-05-31	2011-07-02	2011-09-01
	2011-05-09	2011-05-31	2011-07-04	2011-09-01
	2011-05-09	2011-05-31	2011-07-05	2011-09-01
	2011-05-09	2011-05-31	2011-07-02	2011-09-01
	2011-05-09	2011-05-31	2011-07-04	2011-09-02
	2011-05-09	2011-05-30	2011-07-03	2011-09-01
	2011-05-09	2011-05-31	2011-07-06	2011-09-01
	2011-05-09	2011-05-31	2011-07-02	2011-09-01
	2011-05-09	2011-05-30	2011-07-03	2011-09-01
	2011-05-09	2011-05-30	2011-07-03	2011-09-01
	2011-05-09	2011-05-30	2011-07-04	2011-09-01
	2011-05-09	2011-05-31	2011-07-03	2011-09-01
	2011-05-09	2011-05-31	2011-07-03	2011-09-01
	2011-05-09	2011-05-31	2011-07-02	2011-09-01
	2011-05-09	2011-05-31	2011-07-02	2011-09-01
	2011-05-09	2011-05-31	2011-07-02	2011-09-01
	2011-05-09	2011-05-31	2011-07-02	2011-09-01
	2011-05-09	2011-05-31	2011-07-02	2011-09-01
	2011-05-09	2011-05-30	2011-07-03	2011-09-01
	2011-05-09	2011-05-30	2011-07-03	2011-09-01
	2011-05-09	2011-05-30	2011-07-04	2011-09-01
	2011-05-09	2011-05-31	2011-07-05	2011-09-01
	2011-05-09	2011-05-31	2011-07-04	2011-09-02
	2011-05-09	2011-05-30	2011-07-05	2011-09-01
	2011-05-09	2011-05-30	2011-07-06	2011-09-02
	2011-05-09	2011-05-30	2011-07-03	2011-09-02
	2011-05-09	2011-05-30	2011-07-03	2011-09-02
	2011-05-09	2011-05-30	2011-07-03	2011-09-02
Huajiang 2	2011-05-09	2011-05-30	2011-06-30	2011-09-03
	2011-05-09	2011-05-30	2011-07-01	2011-09-03
	2011-05-09	2011-05-30	2011-07-01	2011-09-03
	2011-05-09	2011-05-31	2011-07-02	2011-09-03
	2011-05-09	2011-05-30	2011-07-01	2011-09-03
	2011-05-09	2011-05-30	2011-07-02	2011-09-03
	2011-05-09	2011-05-30	2011-07-02	2011-09-03
	2011-05-09	2011-05-30	2011-07-02	2011-09-03
	2011-05-09	2011-05-31	2011-07-01	2011-09-03
	2011-05-09	2011-05-31	2011-07-02	2011-09-03
	2011-05-09	2011-05-30	2011-07-03	2011-09-03
	2011-05-09	2011-05-30	2011-07-02	2011-09-03
	2011-05-09	2011-05-30	2011-06-30	2011-09-03
	2011-05-09	2011-05-31	2011-07-03	2011-09-03
	2011-05-09	2011-05-31	2011-07-02	2011-09-03
	2011-05-09	2011-05-30	2011-07-02	2011-09-03
	2011-05-09	2011-05-30	2011-07-02	2011-09-03
	2011-05-09	2011-05-30	2011-07-02	2011-09-03
	2011-05-09	2011-05-31	2011-07-02	2011-09-03
	2011-05-09	2011-05-30	2011-07-02	2011-09-03
	2011-05-09	2011-05-30	2011-07-02	2011-09-03
	2011-05-09	2011-05-30	2011-07-01	2011-09-03
	2011-05-09	2011-06-01	2011-07-02	2011-09-03
	2011-05-09	2011-05-30	2011-06-30	2011-09-03
	2011-05-09	2011-05-30	2011-07-02	2011-09-03
	2011-05-09	2011-05-30	2011-07-02	2011-09-03
	2011-05-09	2011-05-31	2011-06-30	2011-09-03
	2011-05-09	2011-05-31	2011-06-30	2011-09-03
	2011-05-09	2011-05-31	2011-07-02	2011-09-03
	2011-05-09	2011-05-31	2011-07-02	2011-09-03
Mengdou 11	2011-05-09	2011-05-30	2011-07-05	2011-09-05
	2011-05-09	2011-05-31	2011-07-05	2011-09-05
	2011-05-09	2011-05-30	2011-07-05	2011-09-05
	2011-05-09	2011-05-30	2011-07-06	2011-09-05
	2011-05-09	2011-05-31	2011-07-05	2011-09-05
	2011-05-09	2011-05-31	2011-07-05	2011-09-05
	2011-05-09	2011-05-31	2011-07-06	2011-09-05
	2011-05-09	2011-05-31	2011-07-05	2011-09-05
	2011-05-09	2011-05-31	2011-07-04	2011-09-05
	2011-05-09	2011-05-30	2011-07-06	2011-09-05
	2011-05-09	2011-05-30	2011-07-05	2011-09-05
	2011-05-09	2011-05-31	2011-07-05	2011-09-05
	2011-05-09	2011-05-30	2011-07-06	2011-09-05
	2011-05-09	2011-05-30	2011-07-06	2011-09-05
	2011-05-09	2011-05-30	2011-07-06	2011-09-05
	2011-05-09	2011-05-30	2011-07-06	2011-09-05
	2011-05-09	2011-05-30	2011-07-05	2011-09-05
	2011-05-09	2011-05-30	2011-07-05	2011-09-05
	2011-05-09	2011-05-30	2011-07-05	2011-09-05
	2011-05-09	2011-05-30	2011-07-05	2011-09-05
	2011-05-09	2011-05-31	2011-07-05	2011-09-05
	2011-05-09	2011-05-30	2011-07-05	2011-09-05
	2011-05-09	2011-05-30	2011-07-05	2011-09-04
	2011-05-09	2011-05-30	2011-07-05	2011-09-04
	2011-05-09	2011-05-31	2011-07-04	2011-09-04
	2011-05-09	2011-05-31	2011-07-06	2011-09-05
	2011-05-09	2011-05-30	2011-07-05	2011-09-05
	2011-05-09	2011-05-31	2011-07-05	2011-09-04
	2011-05-09	2011-05-30	2011-07-05	2011-09-04
	2011-05-09	2011-05-30	2011-07-05	2011-09-04
Huajiang 3	2011-05-09	2011-05-30	2011-07-06	2011-09-08
	2011-05-09	2011-05-30	2011-07-04	2011-09-08
	2011-05-09	2011-05-31	2011-07-05	2011-09-08
	2011-05-09	2011-05-30	2011-07-06	2011-09-08
	2011-05-09	2011-05-30	2011-07-06	2011-09-08
	2011-05-09	2011-05-30	2011-07-06	2011-09-08
	2011-05-09	2011-05-31	2011-07-06	2011-09-08
	2011-05-09	2011-05-30	2011-07-04	2011-09-09
	2011-05-09	2011-05-30	2011-07-03	2011-09-09
	2011-05-09	2011-05-31	2011-07-05	2011-09-09
	2011-05-09	2011-05-31	2011-07-05	2011-09-09
	2011-05-09	2011-05-31	2011-07-05	2011-09-09
	2011-05-09	2011-05-31	2011-07-06	2011-09-09
	2011-05-09	2011-05-31	2011-07-06	2011-09-09
	2011-05-09	2011-05-31	2011-07-06	2011-09-09
	2011-05-09	2011-05-31	2011-07-03	2011-09-09
	2011-05-09	2011-05-30	2011-07-03	2011-09-09
	2011-05-09	2011-05-30	2011-07-04	2011-09-09
	2011-05-09	2011-05-31	2011-07-04	2011-09-08
	2011-05-09	2011-05-30	2011-07-04	2011-09-09
	2011-05-09	2011-05-30	2011-07-06	2011-09-09
	2011-05-09	2011-05-30	2011-07-03	2011-09-09
	2011-05-09	2011-05-30	2011-07-06	2011-09-09
	2011-05-09	2011-05-30	2011-07-04	2011-09-09
	2011-05-09	2011-05-30	2011-07-05	2011-09-09
	2011-05-09	2011-05-31	2011-07-06	2011-09-09
	2011-05-09	2011-05-31	2011-07-03	2011-09-09
	2011-05-09	2011-05-31	2011-07-06	2011-09-09
	2011-05-09	2011-05-30	2011-07-04	2011-09-09
	2011-05-09	2011-05-30	2011-07-06	2011-09-09
Heihe 39	2011-05-09	2011-05-31	2011-07-05	2011-09-05
	2011-05-09	2011-05-30	2011-07-05	2011-09-03
	2011-05-09	2011-05-31	2011-07-02	2011-09-03
	2011-05-09	2011-05-31	2011-07-03	2011-09-03
	2011-05-09	2011-05-30	2011-07-03	2011-09-03
	2011-05-09	2011-05-30	2011-07-03	2011-09-03
	2011-05-09	2011-05-31	2011-07-05	2011-09-03
	2011-05-09	2011-05-30	2011-07-03	2011-09-03
	2011-05-09	2011-05-29	2011-07-03	2011-09-03
	2011-05-09	2011-05-30	2011-07-03	2011-09-03
	2011-05-09	2011-05-30	2011-07-02	2011-09-03
	2011-05-09	2011-05-30	2011-07-03	2011-09-03
	2011-05-09	2011-05-30	2011-07-03	2011-09-03
	2011-05-09	2011-05-30	2011-07-02	2011-09-04
	2011-05-09	2011-05-30	2011-07-03	2011-09-04
	2011-05-09	2011-05-31	2011-07-05	2011-09-04
	2011-05-09	2011-05-31	2011-07-03	2011-09-04
	2011-05-09	2011-05-30	2011-07-03	2011-09-04
	2011-05-09	2011-05-31	2011-07-03	2011-09-04
	2011-05-09	2011-05-31	2011-07-03	2011-09-04
	2011-05-09	2011-05-30	2011-07-05	2011-09-04
	2011-05-09	2011-05-30	2011-07-03	2011-09-04
	2011-05-09	2011-05-30	2011-07-05	2011-09-04
	2011-05-09	2011-05-29	2011-07-06	2011-09-03
	2011-05-09	2011-05-30	2011-07-05	2011-09-03
	2011-05-09	2011-05-31	2011-07-06	2011-09-03
	2011-05-09	2011-05-31	2011-07-03	2011-09-04
	2011-05-09	2011-05-31	2011-07-03	2011-09-04
	2011-05-09	2011-05-30	2011-07-06	2011-09-04
	2011-05-09	2011-05-30	2011-07-03	2011-09-04
Heihe 51	2011-05-09	2011-05-31	2011-07-04	2011-09-05
	2011-05-09	2011-05-30	2011-07-04	2011-09-05
	2011-05-09	2011-05-30	2011-07-04	2011-09-05
	2011-05-09	2011-05-31	2011-07-05	2011-09-05
	2011-05-09	2011-05-31	2011-07-05	2011-09-05
	2011-05-09	2011-05-30	2011-07-05	2011-09-05
	2011-05-09	2011-05-30	2011-07-06	2011-09-05
	2011-05-09	2011-05-31	2011-07-05	2011-09-05
	2011-05-09	2011-05-30	2011-07-05	2011-09-05
	2011-05-09	2011-05-30	2011-07-05	2011-09-05
	2011-05-09	2011-05-29	2011-07-05	2011-09-05
	2011-05-09	2011-05-30	2011-07-04	2011-09-05
	2011-05-09	2011-05-30	2011-07-05	2011-09-05
	2011-05-09	2011-05-29	2011-07-04	2011-09-05
	2011-05-09	2011-05-30	2011-07-04	2011-09-05
	2011-05-09	2011-05-30	2011-07-05	2011-09-05
	2011-05-09	2011-05-30	2011-07-04	2011-09-06
	2011-05-09	2011-05-30	2011-07-03	2011-09-06
	2011-05-09	2011-05-31	2011-07-03	2011-09-06
	2011-05-09	2011-05-31	2011-07-04	2011-09-06
	2011-05-09	2011-05-30	2011-07-03	2011-09-06
	2011-05-09	2011-05-30	2011-07-05	2011-09-06
	2011-05-09	2011-05-31	2011-07-04	2011-09-06
	2011-05-09	2011-05-30	2011-07-04	2011-09-05
	2011-05-09	2011-05-31	2011-07-06	2011-09-06
	2011-05-09	2011-05-31	2011-07-04	2011-09-05
	2011-05-09	2011-05-30	2011-07-04	2011-09-05
	2011-05-09	2011-05-30	2011-07-04	2011-09-06
	2011-05-09	2011-05-30	2011-07-05	2011-09-06
	2011-05-09	2011-05-31	2011-07-03	2011-09-06
Mengdou 9	2011-05-09	2011-05-30	2011-07-06	2011-09-02
	2011-05-09	2011-05-30	2011-07-06	2011-09-02
	2011-05-09	2011-05-29	2011-07-06	2011-09-01
	2011-05-09	2011-05-29	2011-07-06	2011-09-02
	2011-05-09	2011-05-29	2011-07-06	2011-09-02
	2011-05-09	2011-05-29	2011-07-04	2011-09-02
	2011-05-09	2011-05-29	2011-07-06	2011-09-02
	2011-05-09	2011-05-29	2011-07-07	2011-09-02
	2011-05-09	2011-05-29	2011-07-06	2011-09-02
	2011-05-09	2011-05-29	2011-07-05	2011-09-02
	2011-05-09	2011-05-29	2011-07-06	2011-09-02
	2011-05-09	2011-05-29	2011-07-06	2011-09-02
	2011-05-09	2011-05-29	2011-07-06	2011-09-02
	2011-05-09	2011-05-29	2011-07-04	2011-09-02
	2011-05-09	2011-05-30	2011-07-06	2011-09-02
	2011-05-09	2011-05-29	2011-07-05	2011-09-02
	2011-05-09	2011-05-29	2011-07-06	2011-09-02
	2011-05-09	2011-05-30	2011-07-07	2011-09-01
	2011-05-09	2011-05-29	2011-07-06	2011-09-02
	2011-05-09	2011-05-29	2011-07-06	2011-09-01
	2011-05-09	2011-05-29	2011-07-05	2011-09-01
	2011-05-09	2011-05-29	2011-07-06	2011-09-01
	2011-05-09	2011-05-30	2011-07-06	2011-09-01
	2011-05-09	2011-05-29	2011-07-07	2011-09-01
	2011-05-09	2011-05-29	2011-07-05	2011-09-01
	2011-05-09	2011-05-29	2011-07-05	2011-09-01
	2011-05-09	2011-05-29	2011-07-06	2011-09-01
	2011-05-09	2011-05-29	2011-07-04	2011-09-01
	2011-05-09	2011-05-29	2011-07-04	2011-09-01
	2011-05-09	2011-05-29	2011-07-06	2011-09-01
Heihe 50	2011-05-09	2011-05-30	2011-07-08	2011-09-04
	2011-05-09	2011-05-29	2011-07-09	2011-09-03
	2011-05-09	2011-05-30	2011-07-09	2011-09-03
	2011-05-09	2011-05-30	2011-07-07	2011-09-03
	2011-05-09	2011-05-29	2011-07-06	2011-09-03
	2011-05-09	2011-05-29	2011-07-06	2011-09-03
	2011-05-09	2011-05-28	2011-07-06	2011-09-03
	2011-05-09	2011-05-28	2011-07-10	2011-09-03
	2011-05-09	2011-05-28	2011-07-09	2011-09-03
	2011-05-09	2011-05-28	2011-07-09	2011-09-03
	2011-05-09	2011-05-28	2011-07-09	2011-09-03
	2011-05-09	2011-05-28	2011-07-09	2011-09-03
	2011-05-09	2011-05-28	2011-07-09	2011-09-03
	2011-05-09	2011-05-28	2011-07-10	2011-09-03
	2011-05-09	2011-05-28	2011-07-10	2011-09-03
	2011-05-09	2011-05-28	2011-07-10	2011-09-03
	2011-05-09	2011-05-28	2011-07-09	2011-09-03
	2011-05-09	2011-05-28	2011-07-09	2011-09-03
	2011-05-09	2011-05-28	2011-07-08	2011-09-03
	2011-05-09	2011-05-28	2011-07-09	2011-09-03
	2011-05-09	2011-05-28	2011-07-09	2011-09-03
	2011-05-09	2011-05-28	2011-07-09	2011-09-03
	2011-05-09	2011-05-28	2011-07-09	2011-09-03
	2011-05-09	2011-05-28	2011-07-09	2011-09-03
	2011-05-09	2011-05-28	2011-07-09	2011-09-04
	2011-05-09	2011-05-28	2011-07-09	2011-09-04
	2011-05-09	2011-05-28	2011-07-09	2011-09-04
	2011-05-09	2011-05-28	2011-07-09	2011-09-03
	2011-05-09	2011-05-28	2011-07-09	2011-09-03
	2011-05-09	2011-05-28	2011-07-09	2011-09-03
Beidou 8	2011-05-09	2011-05-30	2011-07-07	2011-09-11
	2011-05-09	2011-05-29	2011-07-05	2011-09-11
	2011-05-09	2011-05-29	2011-07-05	2011-09-11
	2011-05-09	2011-05-29	2011-07-04	2011-09-11
	2011-05-09	2011-05-29	2011-07-04	2011-09-11
	2011-05-09	2011-05-29	2011-07-04	2011-09-11
	2011-05-09	2011-05-29	2011-07-05	2011-09-11
	2011-05-09	2011-05-29	2011-07-07	2011-09-11
	2011-05-09	2011-05-29	2011-07-07	2011-09-11
	2011-05-09	2011-05-29	2011-07-07	2011-09-11
	2011-05-09	2011-05-29	2011-07-06	2011-09-11
	2011-05-09	2011-05-29	2011-07-06	2011-09-11
	2011-05-09	2011-05-29	2011-07-07	2011-09-11
	2011-05-09	2011-05-29	2011-07-06	2011-09-11
	2011-05-09	2011-05-29	2011-07-06	2011-09-11
	2011-05-09	2011-05-29	2011-07-06	2011-09-11
	2011-05-09	2011-05-29	2011-07-06	2011-09-11
	2011-05-09	2011-05-30	2011-07-06	2011-09-11
	2011-05-09	2011-05-29	2011-07-07	2011-09-11
	2011-05-09	2011-05-29	2011-07-06	2011-09-11
	2011-05-09	2011-05-30	2011-07-06	2011-09-12
	2011-05-09	2011-05-29	2011-07-06	2011-09-11
	2011-05-09	2011-05-30	2011-07-05	2011-09-11
	2011-05-09	2011-05-30	2011-07-05	2011-09-12
	2011-05-09	2011-05-30	2011-07-05	2011-09-11
	2011-05-09	2011-05-30	2011-07-06	2011-09-11
	2011-05-09	2011-05-30	2011-07-06	2011-09-11
	2011-05-09	2011-05-30	2011-07-08	2011-09-11
	2011-05-09	2011-05-30	2011-07-06	2011-09-11
	2011-05-09	2011-05-30	2011-07-08	2011-09-11
Jiufeng 10	2011-05-09	2011-05-30	2011-07-05	2011-09-07
	2011-05-09	2011-05-29	2011-07-06	2011-09-07
	2011-05-09	2011-05-29	2011-07-04	2011-09-07
	2011-05-09	2011-05-29	2011-07-04	2011-09-07
	2011-05-09	2011-05-29	2011-07-03	2011-09-07
	2011-05-09	2011-05-29	2011-07-03	2011-09-07
	2011-05-09	2011-05-28	2011-07-03	2011-09-07
	2011-05-09	2011-05-29	2011-07-03	2011-09-07
	2011-05-09	2011-05-29	2011-07-06	2011-09-07
	2011-05-09	2011-05-29	2011-07-05	2011-09-07
	2011-05-09	2011-05-30	2011-07-04	2011-09-07
	2011-05-09	2011-05-28	2011-07-04	2011-09-07
	2011-05-09	2011-05-29	2011-07-04	2011-09-07
	2011-05-09	2011-05-29	2011-07-05	2011-09-08
	2011-05-09	2011-05-29	2011-07-04	2011-09-08
	2011-05-09	2011-05-29	2011-07-07	2011-09-08
	2011-05-09	2011-05-28	2011-07-04	2011-09-08
	2011-05-09	2011-05-28	2011-07-06	2011-09-07
	2011-05-09	2011-05-28	2011-07-04	2011-09-08
	2011-05-09	2011-05-28	2011-07-06	2011-09-07
	2011-05-09	2011-05-28	2011-07-07	2011-09-08
	2011-05-09	2011-05-28	2011-07-06	2011-09-08
	2011-05-09	2011-05-28	2011-07-04	2011-09-08
	2011-05-09	2011-05-28	2011-07-04	2011-09-08
	2011-05-09	2011-05-28	2011-07-03	2011-09-08
	2011-05-09	2011-05-28	2011-07-06	2011-09-08
	2011-05-09	2011-05-28	2011-07-04	2011-09-08
	2011-05-09	2011-05-28	2011-07-04	2011-09-08
	2011-05-09	2011-05-28	2011-07-06	2011-09-08
	2011-05-09	2011-05-28	2011-07-06	2011-09-08
Heihe 5	2011-05-09	2011-05-29	2011-07-06	2011-09-05
	2011-05-09	2011-05-30	2011-07-05	2011-09-05
	2011-05-09	2011-05-30	2011-07-05	2011-09-05
	2011-05-09	2011-05-30	2011-07-06	2011-09-05
	2011-05-09	2011-05-30	2011-07-04	2011-09-05
	2011-05-09	2011-05-30	2011-07-05	2011-09-05
	2011-05-09	2011-05-28	2011-07-05	2011-09-05
	2011-05-09	2011-05-30	2011-07-05	2011-09-05
	2011-05-09	2011-05-30	2011-07-06	2011-09-05
	2011-05-09	2011-05-30	2011-07-05	2011-09-05
	2011-05-09	2011-05-30	2011-07-05	2011-09-05
	2011-05-09	2011-05-28	2011-07-05	2011-09-05
	2011-05-09	2011-05-30	2011-07-05	2011-09-05
	2011-05-09	2011-05-30	2011-07-06	2011-09-05
	2011-05-09	2011-05-30	2011-07-06	2011-09-05
	2011-05-09	2011-05-30	2011-07-06	2011-09-05
	2011-05-09	2011-05-30	2011-07-05	2011-09-05
	2011-05-09	2011-05-30	2011-07-06	2011-09-05
	2011-05-09	2011-05-30	2011-07-05	2011-09-05
	2011-05-09	2011-05-30	2011-07-06	2011-09-05
	2011-05-09	2011-05-30	2011-07-05	2011-09-05
	2011-05-09	2011-05-30	2011-07-06	2011-09-06
	2011-05-09	2011-05-30	2011-07-05	2011-09-06
	2011-05-09	2011-05-30	2011-07-05	2011-09-06
	2011-05-09	2011-05-30	2011-07-05	2011-09-06
	2011-05-09	2011-05-30	2011-07-06	2011-09-05
	2011-05-09	2011-05-30	2011-07-04	2011-09-05
	2011-05-09	2011-05-30	2011-07-04	2011-09-05
	2011-05-09	2011-05-30	2011-07-04	2011-09-06
	2011-05-09	2011-05-30	2011-07-06	2011-09-06
Jiufeng 7	2011-05-09	2011-05-29	2011-07-07	2011-09-07
	2011-05-09	2011-05-30	2011-07-06	2011-09-07
	2011-05-09	2011-05-30	2011-07-06	2011-09-07
	2011-05-09	2011-05-28	2011-07-05	2011-09-07
	2011-05-09	2011-05-28	2011-07-07	2011-09-07
	2011-05-09	2011-05-28	2011-07-04	2011-09-07
	2011-05-09	2011-05-28	2011-07-04	2011-09-07
	2011-05-09	2011-05-28	2011-07-07	2011-09-07
	2011-05-09	2011-05-28	2011-07-07	2011-09-07
	2011-05-09	2011-05-28	2011-07-05	2011-09-07
	2011-05-09	2011-05-28	2011-07-05	2011-09-07
	2011-05-09	2011-05-28	2011-07-05	2011-09-07
	2011-05-09	2011-05-28	2011-07-08	2011-09-07
	2011-05-09	2011-05-28	2011-07-04	2011-09-07
	2011-05-09	2011-05-28	2011-07-07	2011-09-07
	2011-05-09	2011-05-28	2011-07-05	2011-09-07
	2011-05-09	2011-05-28	2011-07-07	2011-09-07
	2011-05-09	2011-05-29	2011-07-05	2011-09-07
	2011-05-09	2011-05-29	2011-07-07	2011-09-08
	2011-05-09	2011-05-29	2011-07-05	2011-09-08
	2011-05-09	2011-05-29	2011-07-07	2011-09-08
	2011-05-09	2011-05-29	2011-07-07	2011-09-08
	2011-05-09	2011-05-29	2011-07-08	2011-09-08
	2011-05-09	2011-05-29	2011-07-07	2011-09-08
	2011-05-09	2011-05-29	2011-07-05	2011-09-07
	2011-05-09	2011-05-29	2011-07-07	2011-09-07
	2011-05-09	2011-05-29	2011-07-07	2011-09-08
	2011-05-09	2011-05-29	2011-07-07	2011-09-07
	2011-05-09	2011-05-29	2011-07-04	2011-09-07
	2011-05-09	2011-05-29	2011-07-05	2011-09-07
Heihe 45	2011-05-09	2011-05-31	2011-07-06	2011-09-04
	2011-05-09	2011-05-30	2011-07-04	2011-09-04
	2011-05-09	2011-05-30	2011-07-04	2011-09-04
	2011-05-09	2011-05-30	2011-07-06	2011-09-04
	2011-05-09	2011-05-31	2011-07-06	2011-09-05
	2011-05-09	2011-05-31	2011-07-06	2011-09-04
	2011-05-09	2011-05-31	2011-07-06	2011-09-04
	2011-05-09	2011-05-31	2011-07-06	2011-09-05
	2011-05-09	2011-05-31	2011-07-06	2011-09-05
	2011-05-09	2011-05-31	2011-07-06	2011-09-04
	2011-05-09	2011-05-30	2011-07-06	2011-09-04
	2011-05-09	2011-05-30	2011-07-06	2011-09-04
	2011-05-09	2011-05-31	2011-07-05	2011-09-05
	2011-05-09	2011-05-30	2011-07-05	2011-09-04
	2011-05-09	2011-05-31	2011-07-05	2011-09-03
	2011-05-09	2011-05-30	2011-07-06	2011-09-04
	2011-05-09	2011-05-30	2011-07-05	2011-09-04
	2011-05-09	2011-05-30	2011-07-04	2011-09-04
	2011-05-09	2011-05-30	2011-07-03	2011-09-04
	2011-05-09	2011-05-30	2011-07-04	2011-09-04
	2011-05-09	2011-05-30	2011-07-03	2011-09-04
	2011-05-09	2011-05-30	2011-07-02	2011-09-04
	2011-05-09	2011-05-30	2011-07-02	2011-09-04
	2011-05-09	2011-05-30	2011-07-04	2011-09-03
	2011-05-09	2011-05-31	2011-07-05	2011-09-04
	2011-05-09	2011-05-31	2011-07-04	2011-09-04
	2011-05-09	2011-05-30	2011-07-04	2011-09-04
	2011-05-09	2011-05-30	2011-07-05	2011-09-04
	2011-05-09	2011-05-31	2011-07-06	2011-09-04
	2011-05-09	2011-05-30	2011-07-04	2011-09-04
Heihe 46	2011-05-09	2011-05-29	2011-07-06	2011-09-11
	2011-05-09	2011-05-30	2011-07-04	2011-09-11
	2011-05-09	2011-05-30	2011-07-05	2011-09-11
	2011-05-09	2011-05-30	2011-07-06	2011-09-11
	2011-05-09	2011-05-30	2011-07-06	2011-09-11
	2011-05-09	2011-05-30	2011-07-06	2011-09-11
	2011-05-09	2011-05-29	2011-07-06	2011-09-11
	2011-05-09	2011-05-30	2011-07-05	2011-09-11
	2011-05-09	2011-05-30	2011-07-06	2011-09-11
	2011-05-09	2011-05-30	2011-07-05	2011-09-11
	2011-05-09	2011-05-31	2011-07-06	2011-09-11
	2011-05-09	2011-05-30	2011-07-07	2011-09-11
	2011-05-09	2011-05-30	2011-07-06	2011-09-11
	2011-05-09	2011-05-30	2011-07-05	2011-09-11
	2011-05-09	2011-05-28	2011-07-06	2011-09-11
	2011-05-09	2011-05-30	2011-07-06	2011-09-11
	2011-05-09	2011-05-30	2011-07-06	2011-09-11
	2011-05-09	2011-05-30	2011-07-06	2011-09-11
	2011-05-09	2011-05-30	2011-07-06	2011-09-11
	2011-05-09	2011-05-29	2011-07-06	2011-09-11
	2011-05-09	2011-05-29	2011-07-07	2011-09-12
	2011-05-09	2011-05-30	2011-07-06	2011-09-11
	2011-05-09	2011-05-30	2011-07-07	2011-09-12
	2011-05-09	2011-05-31	2011-07-06	2011-09-12
	2011-05-09	2011-05-30	2011-07-06	2011-09-12
	2011-05-09	2011-05-30	2011-07-07	2011-09-12
	2011-05-09	2011-05-30	2011-07-06	2011-09-12
	2011-05-09	2011-05-30	2011-07-06	2011-09-12
	2011-05-09	2011-05-28	2011-07-06	2011-09-12
	2011-05-09	2011-05-30	2011-07-06	2011-09-12
Fengshou 26	2011-05-09	2011-05-30	2011-07-05	2011-09-12
	2011-05-09	2011-05-30	2011-07-04	2011-09-12
	2011-05-09	2011-05-29	2011-07-05	2011-09-13
	2011-05-09	2011-05-30	2011-07-04	2011-09-13
	2011-05-09	2011-05-28	2011-07-04	2011-09-13
	2011-05-09	2011-05-29	2011-07-05	2011-09-13
	2011-05-09	2011-05-30	2011-07-05	2011-09-13
	2011-05-09	2011-05-30	2011-07-05	2011-09-13
	2011-05-09	2011-05-30	2011-07-07	2011-09-13
	2011-05-09	2011-05-28	2011-07-06	2011-09-13
	2011-05-09	2011-05-30	2011-07-03	2011-09-13
	2011-05-09	2011-05-30	2011-07-05	2011-09-13
	2011-05-09	2011-05-29	2011-07-07	2011-09-13
	2011-05-09	2011-05-30	2011-07-05	2011-09-13
	2011-05-09	2011-05-30	2011-07-04	2011-09-13
	2011-05-09	2011-05-30	2011-07-04	2011-09-13
	2011-05-09	2011-05-30	2011-07-06	2011-09-13
	2011-05-09	2011-05-28	2011-07-04	2011-09-13
	2011-05-09	2011-05-30	2011-07-04	2011-09-13
	2011-05-09	2011-05-30	2011-07-05	2011-09-13
	2011-05-09	2011-05-30	2011-07-04	2011-09-13
	2011-05-09	2011-05-28	2011-07-04	2011-09-13
	2011-05-09	2011-05-30	2011-07-06	2011-09-13
	2011-05-09	2011-05-30	2011-07-05	2011-09-13
	2011-05-09	2011-05-30	2011-07-06	2011-09-13
	2011-05-09	2011-05-30	2011-07-05	2011-09-12
	2011-05-09	2011-05-29	2011-07-04	2011-09-13
	2011-05-09	2011-05-30	2011-07-04	2011-09-13
	2011-05-09	2011-05-30	2011-07-04	2011-09-12
	2011-05-09	2011-05-30	2011-07-03	2011-09-13
Fengshou 27	2011-05-09	2011-05-30	2011-07-06	2011-09-16
	2011-05-09	2011-05-29	2011-07-06	2011-09-17
	2011-05-09	2011-05-30	2011-07-06	2011-09-16
	2011-05-09	2011-05-30	2011-07-05	2011-09-17
	2011-05-09	2011-05-29	2011-07-06	2011-09-17
	2011-05-09	2011-05-30	2011-07-06	2011-09-17
	2011-05-09	2011-05-30	2011-07-05	2011-09-17
	2011-05-09	2011-05-29	2011-07-05	2011-09-17
	2011-05-09	2011-05-29	2011-07-05	2011-09-17
	2011-05-09	2011-05-30	2011-07-06	2011-09-17
	2011-05-09	2011-05-30	2011-07-05	2011-09-17
	2011-05-09	2011-05-29	2011-07-06	2011-09-17
	2011-05-09	2011-05-29	2011-07-05	2011-09-17
	2011-05-09	2011-05-30	2011-07-06	2011-09-17
	2011-05-09	2011-05-30	2011-07-06	2011-09-17
	2011-05-09	2011-05-30	2011-07-04	2011-09-17
	2011-05-09	2011-05-30	2011-07-06	2011-09-17
	2011-05-09	2011-05-30	2011-07-05	2011-09-17
	2011-05-09	2011-05-30	2011-07-06	2011-09-16
	2011-05-09	2011-05-30	2011-07-05	2011-09-17
	2011-05-09	2011-05-30	2011-07-05	2011-09-17
	2011-05-09	2011-05-29	2011-07-04	2011-09-16
	2011-05-09	2011-05-29	2011-07-04	2011-09-16
	2011-05-09	2011-05-29	2011-07-06	2011-09-16
	2011-05-09	2011-05-29	2011-07-06	2011-09-16
	2011-05-09	2011-05-30	2011-07-06	2011-09-16
	2011-05-09	2011-05-30	2011-07-05	2011-09-16
	2011-05-09	2011-05-30	2011-07-05	2011-09-16
	2011-05-09	2011-05-30	2011-07-06	2011-09-16
	2011-05-09	2011-05-30	2011-07-06	2011-09-16
Fengshou 24	2011-05-09	2011-05-30	2011-07-03	2011-09-05
	2011-05-09	2011-05-30	2011-07-04	2011-09-05
	2011-05-09	2011-05-30	2011-07-04	2011-09-06
	2011-05-09	2011-05-30	2011-07-07	2011-09-06
	2011-05-09	2011-05-29	2011-07-05	2011-09-06
	2011-05-09	2011-05-29	2011-07-05	2011-09-06
	2011-05-09	2011-05-28	2011-07-04	2011-09-06
	2011-05-09	2011-05-30	2011-07-06	2011-09-06
	2011-05-09	2011-05-30	2011-07-06	2011-09-06
	2011-05-09	2011-05-30	2011-07-05	2011-09-05
	2011-05-09	2011-05-28	2011-07-05	2011-09-06
	2011-05-09	2011-05-28	2011-07-05	2011-09-05
	2011-05-09	2011-05-30	2011-07-07	2011-09-05
	2011-05-09	2011-05-30	2011-07-05	2011-09-05
	2011-05-09	2011-05-30	2011-07-06	2011-09-05
	2011-05-09	2011-05-30	2011-07-06	2011-09-05
	2011-05-09	2011-05-30	2011-07-06	2011-09-05
	2011-05-09	2011-05-30	2011-07-05	2011-09-05
	2011-05-09	2011-05-30	2011-07-05	2011-09-05
	2011-05-09	2011-05-28	2011-07-05	2011-09-05
	2011-05-09	2011-05-30	2011-07-05	2011-09-05
	2011-05-09	2011-05-30	2011-07-07	2011-09-05
	2011-05-09	2011-05-30	2011-07-06	2011-09-05
	2011-05-09	2011-05-30	2011-07-07	2011-09-05
	2011-05-09	2011-05-30	2011-07-03	2011-09-05
	2011-05-09	2011-05-28	2011-07-04	2011-09-05
	2011-05-09	2011-05-28	2011-07-05	2011-09-06
	2011-05-09	2011-05-28	2011-07-06	2011-09-06
	2011-05-09	2011-05-30	2011-07-04	2011-09-06
	2011-05-09	2011-05-30	2011-07-05	2011-09-06
Heihe 43	2011-05-09	2011-05-30	2011-07-03	2011-09-07
	2011-05-09	2011-05-30	2011-07-06	2011-09-07
	2011-05-09	2011-05-30	2011-07-04	2011-09-06
	2011-05-09	2011-05-30	2011-07-05	2011-09-06
	2011-05-09	2011-05-28	2011-07-06	2011-09-06
	2011-05-09	2011-05-29	2011-07-03	2011-09-06
	2011-05-09	2011-05-28	2011-07-03	2011-09-06
	2011-05-09	2011-05-30	2011-07-03	2011-09-06
	2011-05-09	2011-05-30	2011-07-05	2011-09-06
	2011-05-09	2011-05-30	2011-07-03	2011-09-06
	2011-05-09	2011-05-30	2011-07-03	2011-09-06
	2011-05-09	2011-05-30	2011-07-06	2011-09-06
	2011-05-09	2011-05-29	2011-07-05	2011-09-06
	2011-05-09	2011-05-29	2011-07-04	2011-09-06
	2011-05-09	2011-05-29	2011-07-06	2011-09-06
	2011-05-09	2011-05-29	2011-07-07	2011-09-06
	2011-05-09	2011-05-30	2011-07-03	2011-09-06
	2011-05-09	2011-05-30	2011-07-04	2011-09-06
	2011-05-09	2011-05-30	2011-07-05	2011-09-07
	2011-05-09	2011-05-30	2011-07-06	2011-09-06
	2011-05-09	2011-05-30	2011-07-05	2011-09-07
	2011-05-09	2011-05-28	2011-07-05	2011-09-06
	2011-05-09	2011-05-28	2011-07-05	2011-09-06
	2011-05-09	2011-05-28	2011-07-05	2011-09-06
	2011-05-09	2011-05-28	2011-07-05	2011-09-06
	2011-05-09	2011-05-28	2011-07-03	2011-09-06
	2011-05-09	2011-05-30	2011-07-03	2011-09-06
	2011-05-09	2011-05-30	2011-07-04	2011-09-06
	2011-05-09	2011-05-29	2011-07-06	2011-09-06
	2011-05-09	2011-05-29	2011-07-06	2011-09-06
Fengshou 15	2011-05-09	2011-05-30	2011-07-05	2011-09-10
	2011-05-09	2011-05-30	2011-07-03	2011-09-11
	2011-05-09	2011-05-30	2011-07-03	2011-09-11
	2011-05-09	2011-05-29	2011-07-04	2011-09-11
	2011-05-09	2011-05-30	2011-07-05	2011-09-11
	2011-05-09	2011-05-30	2011-07-06	2011-09-11
	2011-05-09	2011-05-30	2011-07-06	2011-09-11
	2011-05-09	2011-05-30	2011-07-03	2011-09-11
	2011-05-09	2011-05-30	2011-07-05	2011-09-11
	2011-05-09	2011-05-30	2011-07-05	2011-09-11
	2011-05-09	2011-05-30	2011-07-05	2011-09-11
	2011-05-09	2011-05-30	2011-07-05	2011-09-11
	2011-05-09	2011-05-30	2011-07-03	2011-09-11
	2011-05-09	2011-05-30	2011-07-06	2011-09-11
	2011-05-09	2011-05-30	2011-07-04	2011-09-11
	2011-05-09	2011-05-30	2011-07-05	2011-09-11
	2011-05-09	2011-05-30	2011-07-06	2011-09-11
	2011-05-09	2011-05-30	2011-07-05	2011-09-11
	2011-05-09	2011-05-30	2011-07-05	2011-09-10
	2011-05-09	2011-05-30	2011-07-05	2011-09-10
	2011-05-09	2011-05-30	2011-07-05	2011-09-10
	2011-05-09	2011-05-30	2011-07-03	2011-09-11
	2011-05-09	2011-05-30	2011-07-05	2011-09-11
	2011-05-09	2011-05-28	2011-07-05	2011-09-11
	2011-05-09	2011-05-28	2011-07-04	2011-09-11
	2011-05-09	2011-05-28	2011-07-05	2011-09-11
	2011-05-09	2011-05-28	2011-07-05	2011-09-11
	2011-05-09	2011-05-28	2011-07-05	2011-09-11
	2011-05-09	2011-05-28	2011-07-05	2011-09-11
	2011-05-09	2011-05-29	2011-07-05	2011-09-11
Jiufeng 9	2011-05-09	2011-05-30	2011-07-04	2011-09-10
	2011-05-09	2011-05-28	2011-07-05	2011-09-10
	2011-05-09	2011-05-29	2011-07-05	2011-09-10
	2011-05-09	2011-05-30	2011-07-05	2011-09-10
	2011-05-09	2011-05-30	2011-07-06	2011-09-10
	2011-05-09	2011-05-29	2011-07-05	2011-09-10
	2011-05-09	2011-05-28	2011-07-06	2011-09-10
	2011-05-09	2011-05-29	2011-07-03	2011-09-10
	2011-05-09	2011-05-29	2011-07-05	2011-09-10
	2011-05-09	2011-05-29	2011-07-05	2011-09-10
	2011-05-09	2011-05-30	2011-07-06	2011-09-10
	2011-05-09	2011-05-30	2011-07-06	2011-09-10
	2011-05-09	2011-05-30	2011-07-05	2011-09-10
	2011-05-09	2011-05-30	2011-07-06	2011-09-10
	2011-05-09	2011-05-28	2011-07-05	2011-09-10
	2011-05-09	2011-05-28	2011-07-04	2011-09-10
	2011-05-09	2011-05-28	2011-07-05	2011-09-10
	2011-05-09	2011-05-30	2011-07-05	2011-09-10
	2011-05-09	2011-05-30	2011-07-04	2011-09-10
	2011-05-09	2011-05-30	2011-07-06	2011-09-11
	2011-05-09	2011-05-30	2011-07-06	2011-09-11
	2011-05-09	2011-05-29	2011-07-05	2011-09-11
	2011-05-09	2011-05-29	2011-07-04	2011-09-10
	2011-05-09	2011-05-30	2011-07-04	2011-09-10
	2011-05-09	2011-05-30	2011-07-04	2011-09-10
	2011-05-09	2011-05-29	2011-07-06	2011-09-10
	2011-05-09	2011-05-29	2011-07-05	2011-09-11
	2011-05-09	2011-05-30	2011-07-05	2011-09-11
	2011-05-09	2011-05-30	2011-07-06	2011-09-10
	2011-05-09	2011-05-30	2011-07-07	2011-09-10
Beidou 19	2011-05-09	2011-05-29	2011-07-07	2011-09-11
	2011-05-09	2011-05-30	2011-07-05	2011-09-11
	2011-05-09	2011-05-30	2011-07-06	2011-09-11
	2011-05-09	2011-05-30	2011-07-05	2011-09-11
	2011-05-09	2011-05-30	2011-07-06	2011-09-11
	2011-05-09	2011-05-29	2011-07-06	2011-09-11
	2011-05-09	2011-05-29	2011-07-07	2011-09-11
	2011-05-09	2011-05-29	2011-07-06	2011-09-11
	2011-05-09	2011-05-29	2011-07-07	2011-09-11
	2011-05-09	2011-05-30	2011-07-06	2011-09-11
	2011-05-09	2011-05-30	2011-07-07	2011-09-11
	2011-05-09	2011-05-30	2011-07-07	2011-09-11
	2011-05-09	2011-05-30	2011-07-07	2011-09-11
	2011-05-09	2011-05-28	2011-07-04	2011-09-11
	2011-05-09	2011-05-28	2011-07-05	2011-09-11
	2011-05-09	2011-05-28	2011-07-07	2011-09-11
	2011-05-09	2011-05-28	2011-07-05	2011-09-11
	2011-05-09	2011-05-30	2011-07-05	2011-09-11
	2011-05-09	2011-05-30	2011-07-05	2011-09-10
	2011-05-09	2011-05-28	2011-07-06	2011-09-11
	2011-05-09	2011-05-28	2011-07-05	2011-09-11
	2011-05-09	2011-05-28	2011-07-06	2011-09-10
	2011-05-09	2011-05-30	2011-07-03	2011-09-10
	2011-05-09	2011-05-30	2011-07-04	2011-09-10
	2011-05-09	2011-05-30	2011-07-04	2011-09-11
	2011-05-09	2011-05-28	2011-07-06	2011-09-11
	2011-05-09	2011-05-28	2011-07-05	2011-09-11
	2011-05-09	2011-05-28	2011-07-07	2011-09-11
	2011-05-09	2011-05-30	2011-07-06	2011-09-11
	2011-05-09	2011-05-30	2011-07-07	2011-09-11
Heihe 48	2011-05-09	2011-05-30	2011-07-07	2011-09-12
	2011-05-09	2011-05-30	2011-07-06	2011-09-12
	2011-05-09	2011-05-30	2011-07-06	2011-09-13
	2011-05-09	2011-05-30	2011-07-06	2011-09-13
	2011-05-09	2011-05-27	2011-07-06	2011-09-13
	2011-05-09	2011-05-28	2011-07-05	2011-09-13
	2011-05-09	2011-05-29	2011-07-07	2011-09-13
	2011-05-09	2011-05-28	2011-07-07	2011-09-13
	2011-05-09	2011-05-28	2011-07-07	2011-09-13
	2011-05-09	2011-05-28	2011-07-07	2011-09-13
	2011-05-09	2011-05-30	2011-07-06	2011-09-13
	2011-05-09	2011-05-30	2011-07-05	2011-09-13
	2011-05-09	2011-05-30	2011-07-07	2011-09-13
	2011-05-09	2011-05-30	2011-07-06	2011-09-12
	2011-05-09	2011-05-30	2011-07-08	2011-09-12
	2011-05-09	2011-05-28	2011-07-05	2011-09-12
	2011-05-09	2011-05-28	2011-07-06	2011-09-12
	2011-05-09	2011-05-28	2011-07-06	2011-09-13
	2011-05-09	2011-05-30	2011-07-07	2011-09-13
	2011-05-09	2011-05-30	2011-07-07	2011-09-13
	2011-05-09	2011-05-30	2011-07-05	2011-09-13
	2011-05-09	2011-05-30	2011-07-07	2011-09-13
	2011-05-09	2011-05-28	2011-07-07	2011-09-13
	2011-05-09	2011-05-28	2011-07-05	2011-09-13
	2011-05-09	2011-05-28	2011-07-06	2011-09-13
	2011-05-09	2011-05-28	2011-07-05	2011-09-13
	2011-05-09	2011-05-30	2011-07-06	2011-09-13
	2011-05-09	2011-05-30	2011-07-05	2011-09-13
	2011-05-09	2011-05-30	2011-07-05	2011-09-13
	2011-05-09	2011-05-30	2011-07-07	2011-09-13
Heihe 38	2011-05-09	2011-05-30	2011-07-05	2011-09-12
	2011-05-09	2011-05-30	2011-07-06	2011-09-12
	2011-05-09	2011-05-30	2011-07-03	2011-09-12
	2011-05-09	2011-05-28	2011-07-06	2011-09-12
	2011-05-09	2011-05-28	2011-07-07	2011-09-12
	2011-05-09	2011-05-30	2011-07-06	2011-09-12
	2011-05-09	2011-05-30	2011-07-05	2011-09-12
	2011-05-09	2011-05-29	2011-07-07	2011-09-12
	2011-05-09	2011-05-29	2011-07-05	2011-09-12
	2011-05-09	2011-05-29	2011-07-03	2011-09-12
	2011-05-09	2011-05-29	2011-07-07	2011-09-12
	2011-05-09	2011-05-30	2011-07-05	2011-09-12
	2011-05-09	2011-05-30	2011-07-06	2011-09-12
	2011-05-09	2011-05-29	2011-07-05	2011-09-12
	2011-05-09	2011-05-29	2011-07-06	2011-09-12
	2011-05-09	2011-05-28	2011-07-06	2011-09-12
	2011-05-09	2011-05-30	2011-07-06	2011-09-12
	2011-05-09	2011-05-30	2011-07-06	2011-09-12
	2011-05-09	2011-05-28	2011-07-06	2011-09-12
	2011-05-09	2011-05-29	2011-07-06	2011-09-12
	2011-05-09	2011-05-28	2011-07-05	2011-09-12
	2011-05-09	2011-05-30	2011-07-07	2011-09-13
	2011-05-09	2011-05-30	2011-07-03	2011-09-13
	2011-05-09	2011-05-30	2011-07-05	2011-09-12
	2011-05-09	2011-05-29	2011-07-05	2011-09-12
	2011-05-09	2011-05-30	2011-07-07	2011-09-13
	2011-05-09	2011-05-30	2011-07-06	2011-09-13
	2011-05-09	2011-05-29	2011-07-06	2011-09-13
	2011-05-09	2011-05-28	2011-07-05	2011-09-13
	2011-05-09	2011-05-30	2011-07-05	2011-09-13
Heihe 36	2011-05-09	2011-05-30	2011-07-03	2011-09-16
	2011-05-09	2011-05-30	2011-07-03	2011-09-16
	2011-05-09	2011-05-29	2011-07-03	2011-09-16
	2011-05-09	2011-05-28	2011-07-05	2011-09-16
	2011-05-09	2011-05-30	2011-07-03	2011-09-16
	2011-05-09	2011-05-30	2011-07-03	2011-09-16
	2011-05-09	2011-05-30	2011-07-05	2011-09-16
	2011-05-09	2011-05-30	2011-07-03	2011-09-16
	2011-05-09	2011-05-30	2011-07-03	2011-09-16
	2011-05-09	2011-05-28	2011-07-03	2011-09-16
	2011-05-09	2011-05-28	2011-07-03	2011-09-16
	2011-05-09	2011-05-28	2011-07-03	2011-09-16
	2011-05-09	2011-05-30	2011-07-03	2011-09-17
	2011-05-09	2011-05-30	2011-07-03	2011-09-17
	2011-05-09	2011-05-30	2011-07-05	2011-09-17
	2011-05-09	2011-05-30	2011-07-03	2011-09-17
	2011-05-09	2011-05-30	2011-07-04	2011-09-16
	2011-05-09	2011-05-28	2011-07-03	2011-09-16
	2011-05-09	2011-05-28	2011-07-05	2011-09-16
	2011-05-09	2011-05-29	2011-07-04	2011-09-16
	2011-05-09	2011-05-28	2011-07-03	2011-09-16
	2011-05-09	2011-05-28	2011-07-04	2011-09-16
	2011-05-09	2011-05-28	2011-07-05	2011-09-16
	2011-05-09	2011-05-28	2011-07-06	2011-09-16
	2011-05-09	2011-05-30	2011-07-05	2011-09-16
	2011-05-09	2011-05-30	2011-07-06	2011-09-16
	2011-05-09	2011-05-30	2011-07-03	2011-09-16
	2011-05-09	2011-05-30	2011-07-03	2011-09-16
	2011-05-09	2011-05-30	2011-07-03	2011-09-16
	2011-05-09	2011-05-28	2011-07-05	2011-09-16
Bei 1249	2011-05-09	2011-05-28	2011-07-04	2011-09-14
	2011-05-09	2011-05-28	2011-07-05	2011-09-15
	2011-05-09	2011-05-28	2011-07-06	2011-09-15
	2011-05-09	2011-05-28	2011-07-05	2011-09-15
	2011-05-09	2011-05-28	2011-07-07	2011-09-14
	2011-05-09	2011-05-30	2011-07-06	2011-09-14
	2011-05-09	2011-05-30	2011-07-06	2011-09-14
	2011-05-09	2011-05-30	2011-07-06	2011-09-14
	2011-05-09	2011-05-30	2011-07-04	2011-09-14
	2011-05-09	2011-05-30	2011-07-06	2011-09-14
	2011-05-09	2011-05-29	2011-07-06	2011-09-14
	2011-05-09	2011-05-30	2011-07-07	2011-09-14
	2011-05-09	2011-05-30	2011-07-07	2011-09-14
	2011-05-09	2011-05-29	2011-07-06	2011-09-14
	2011-05-09	2011-05-29	2011-07-05	2011-09-14
	2011-05-09	2011-05-29	2011-07-07	2011-09-14
	2011-05-09	2011-05-29	2011-07-06	2011-09-14
	2011-05-09	2011-05-30	2011-07-06	2011-09-14
	2011-05-09	2011-05-30	2011-07-07	2011-09-14
[truncated: 791 more rows]
